# Supplementary material
Source: ML conference proceedings conference paper supplement (https://openreview.net/forum?id=Cth1PyCwZt)

**PRF (resplD # 2)**

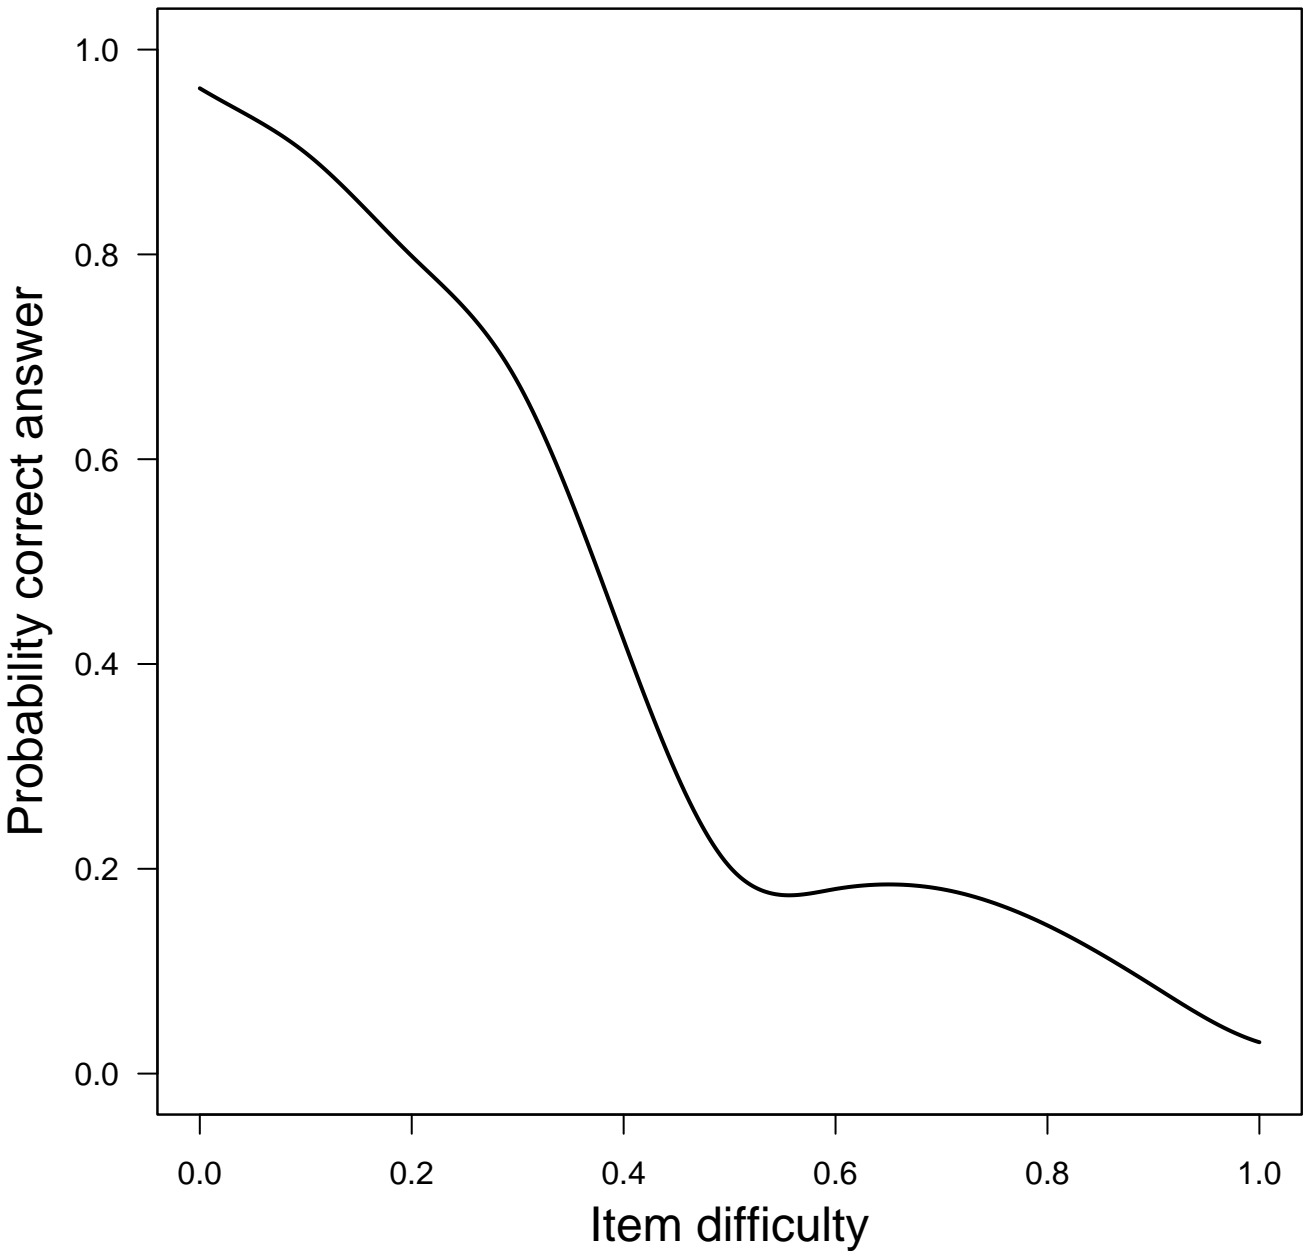

**PRF (resplD # 4)**

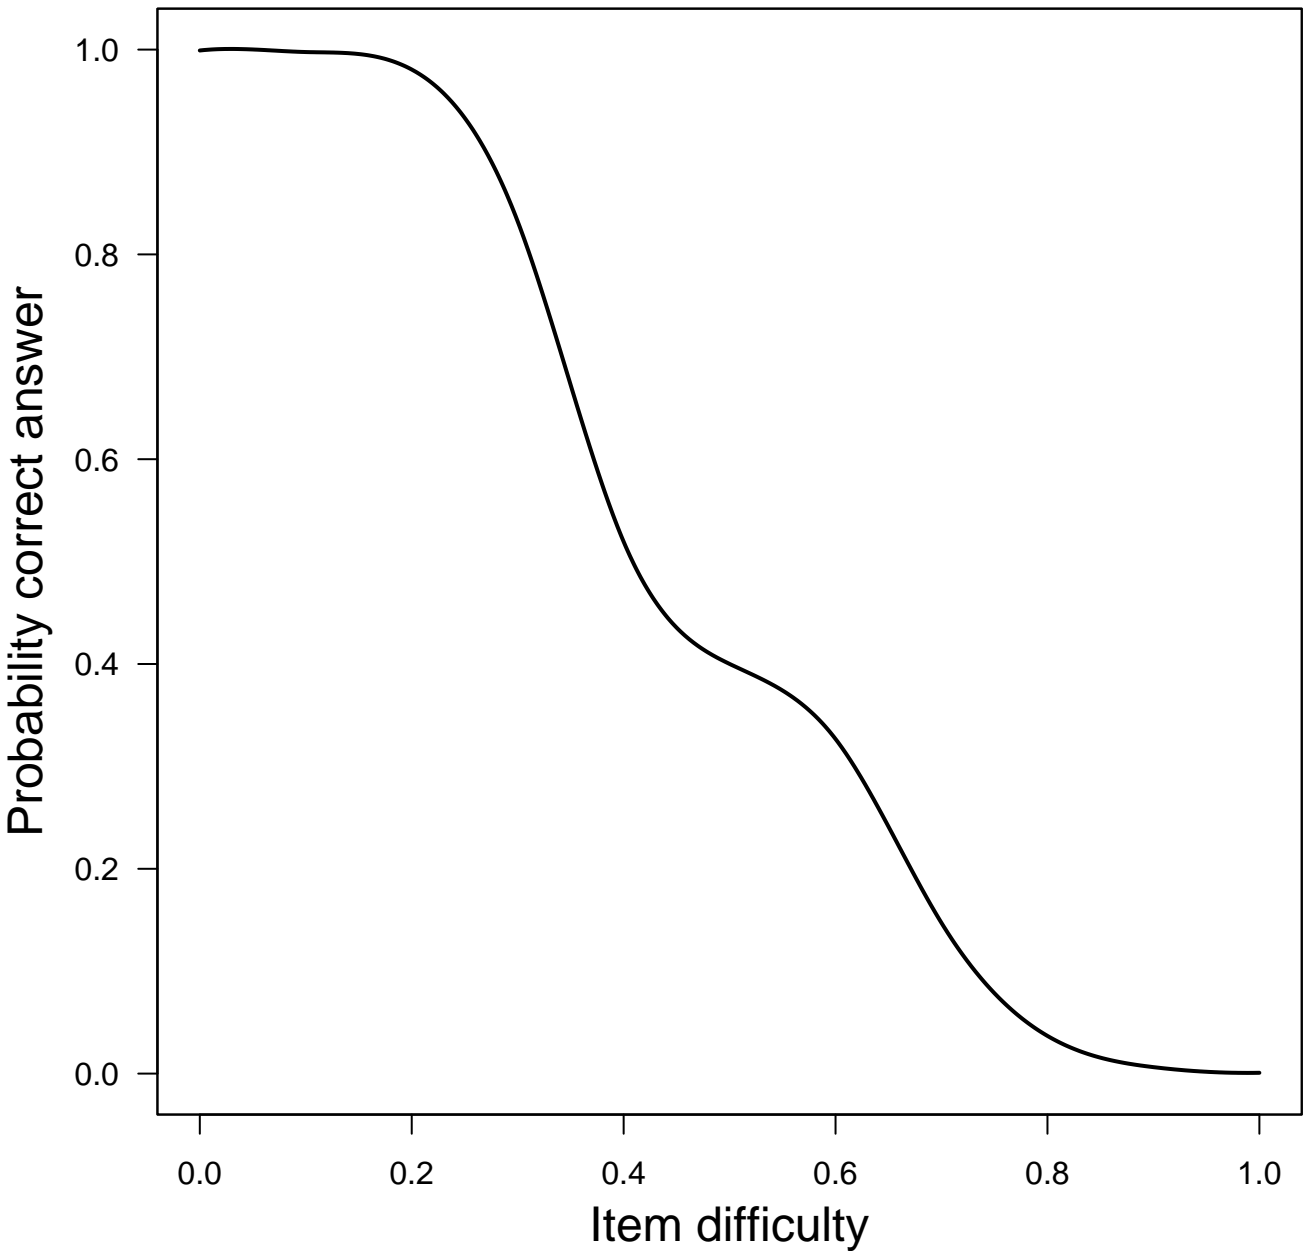

**PRF (resplD # 9)**

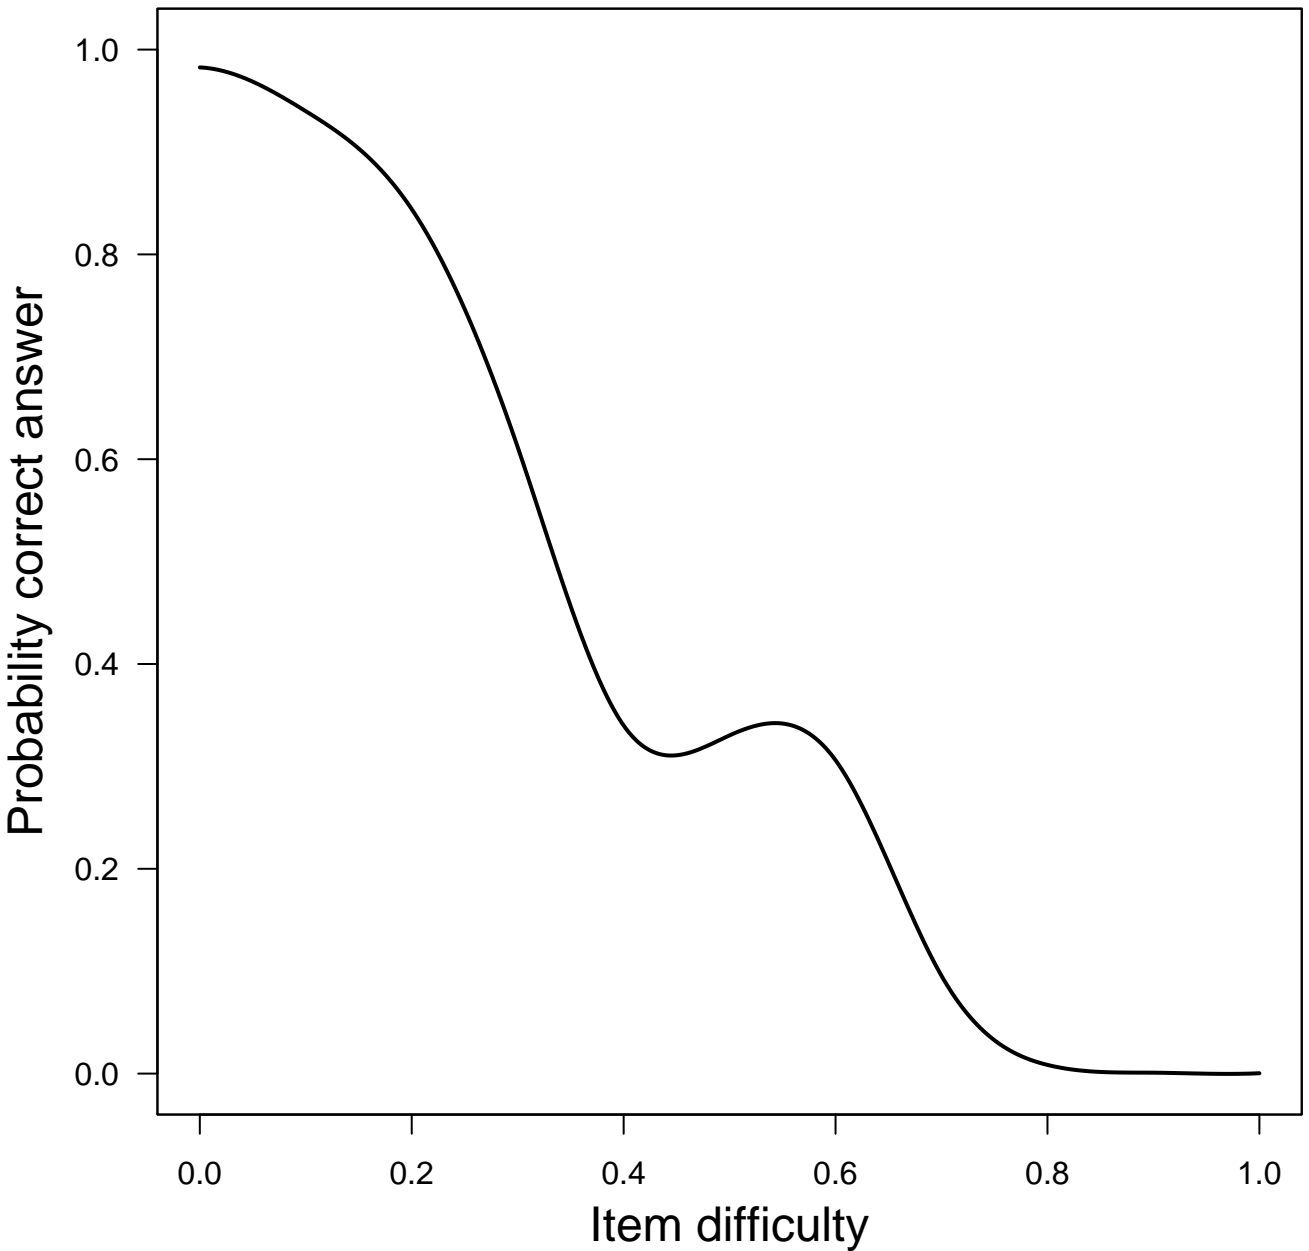

**PRF (resplD # 10)**

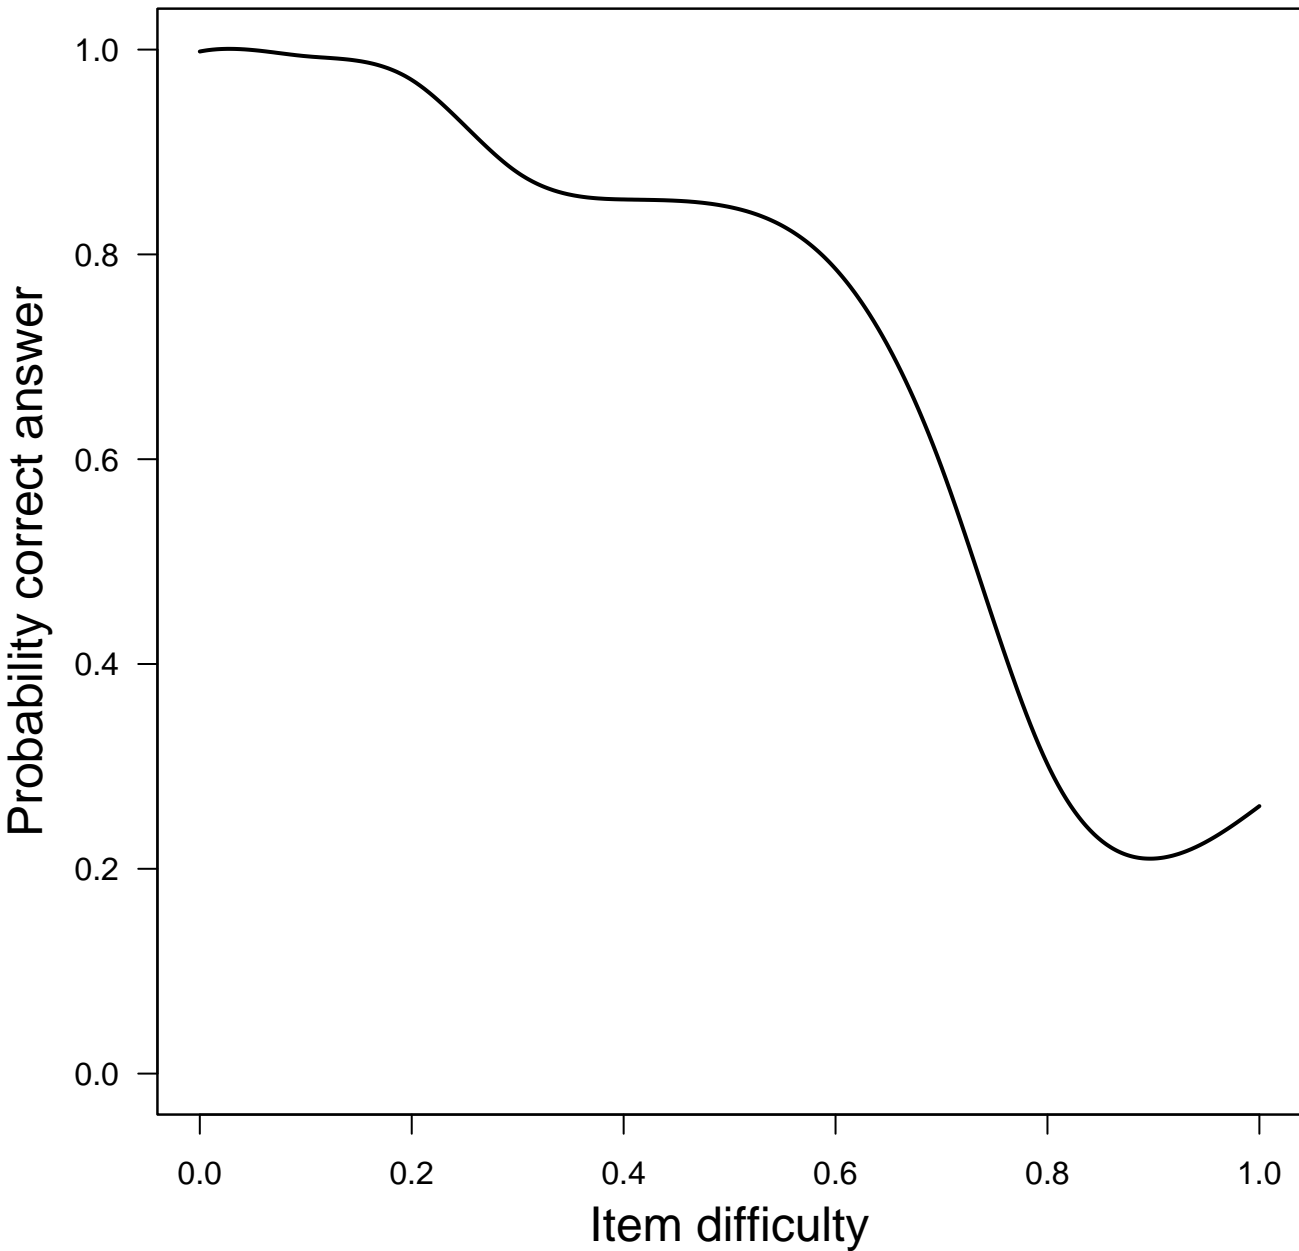

**PRF (resplD # 11)**

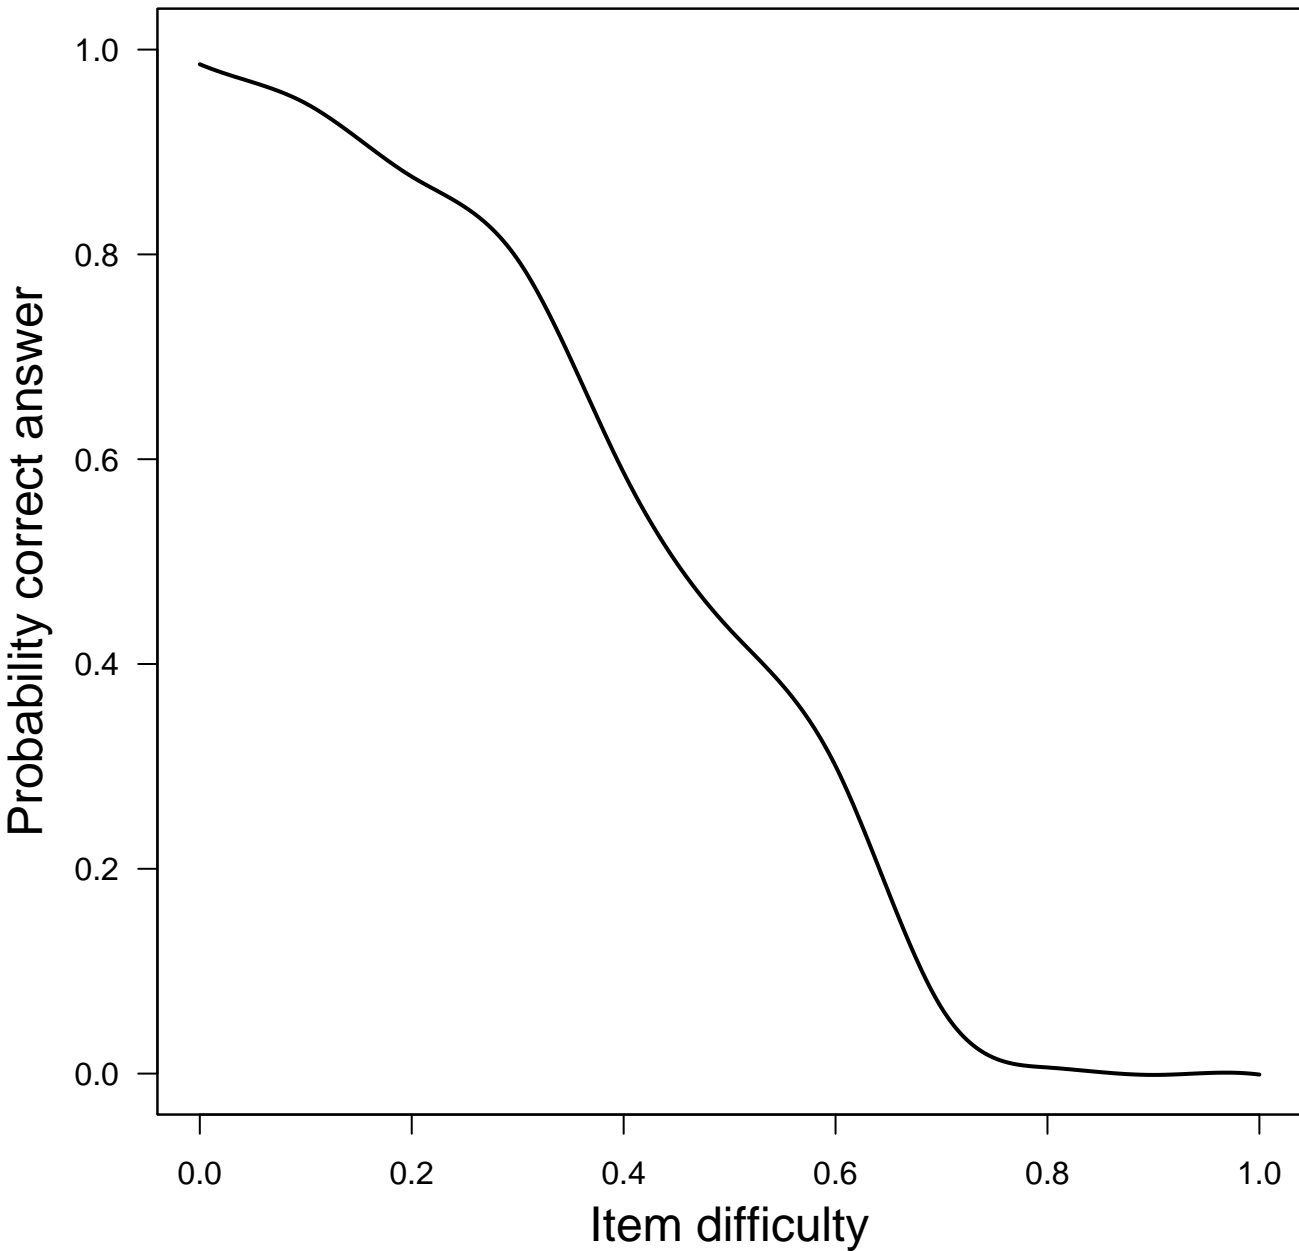

**PRF (resplD # 12)**

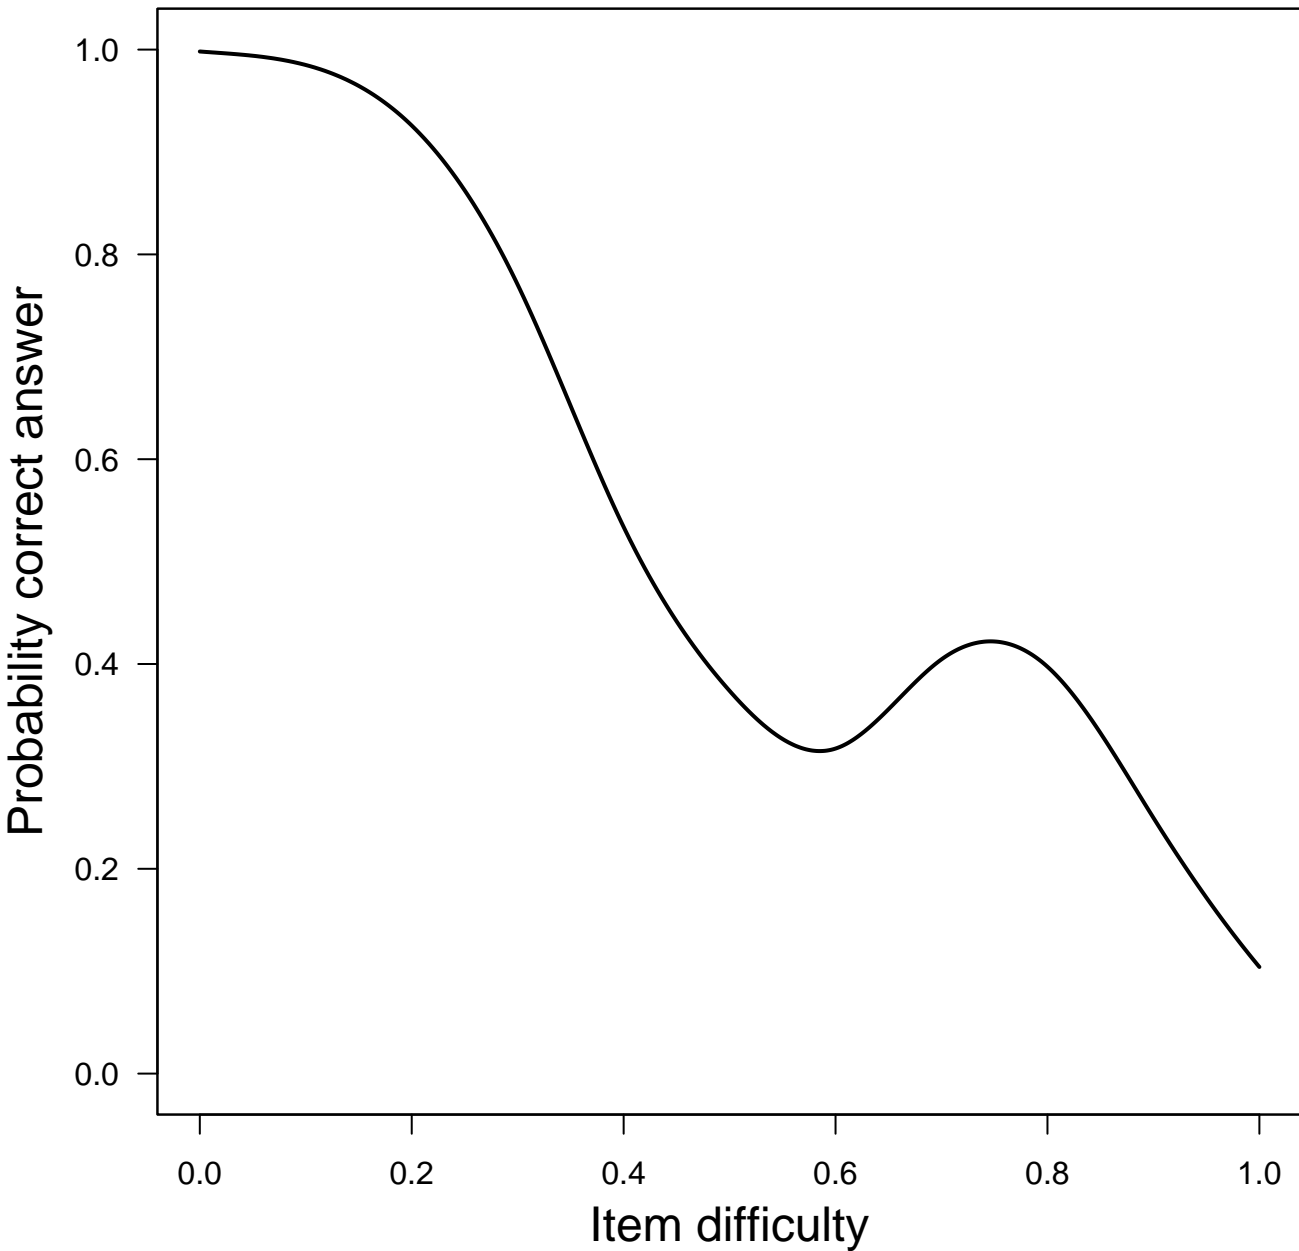

**PRF (resplD # 14)**

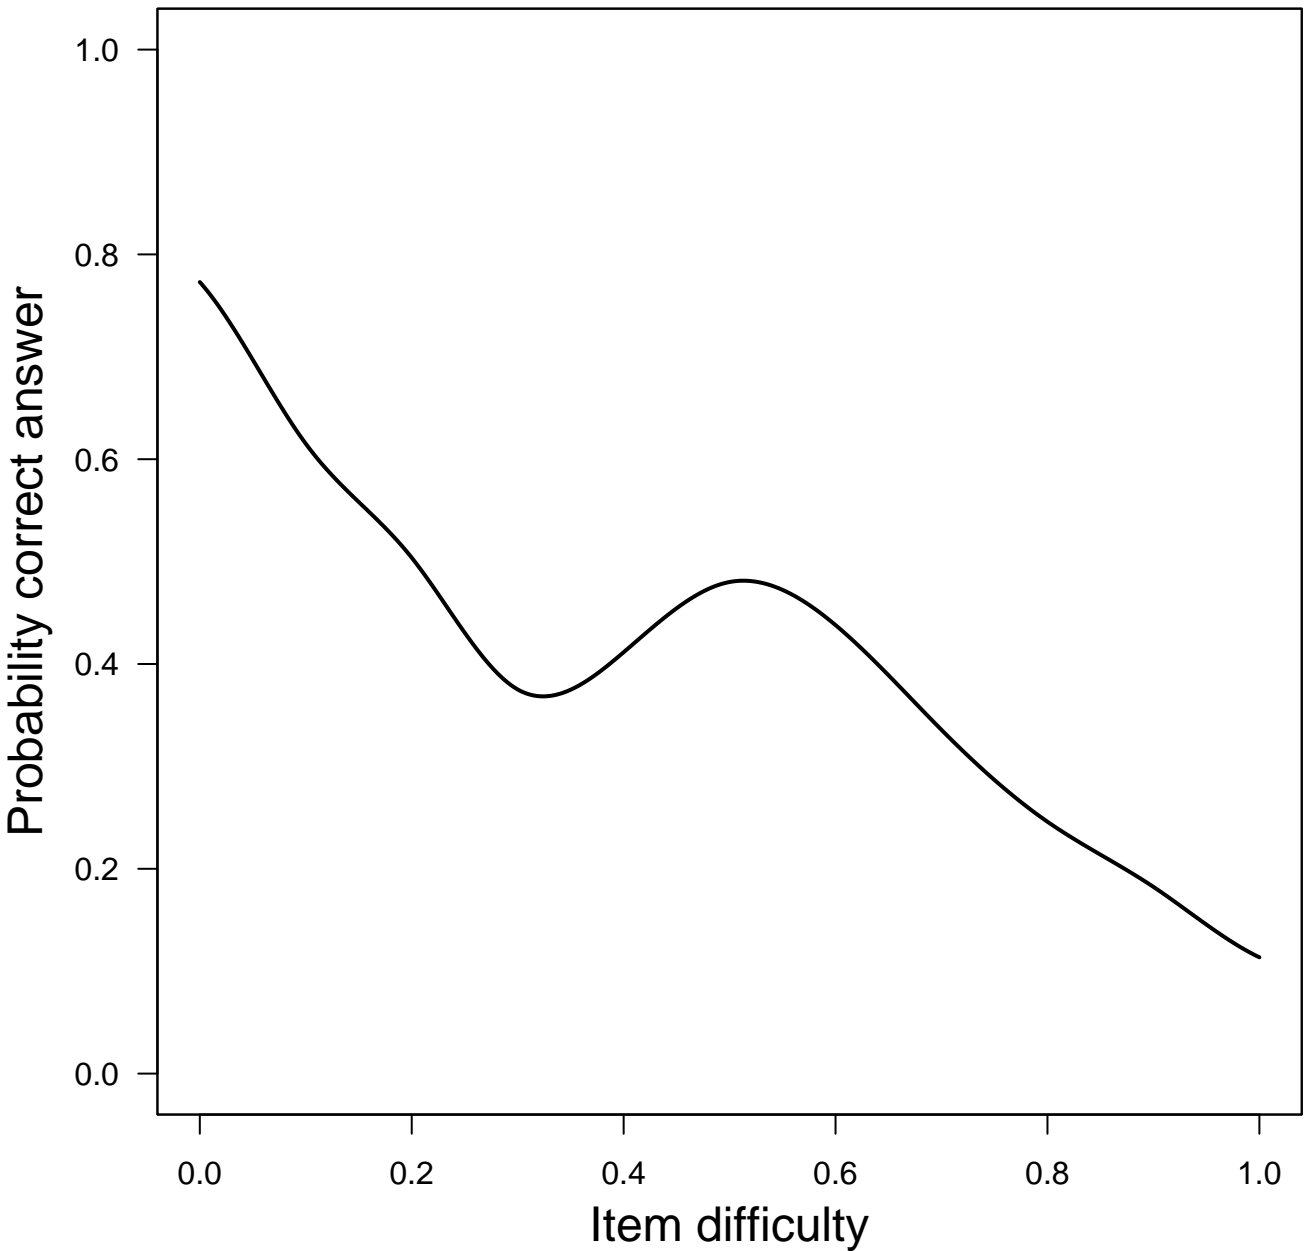

**PRF (resplD # 15)**

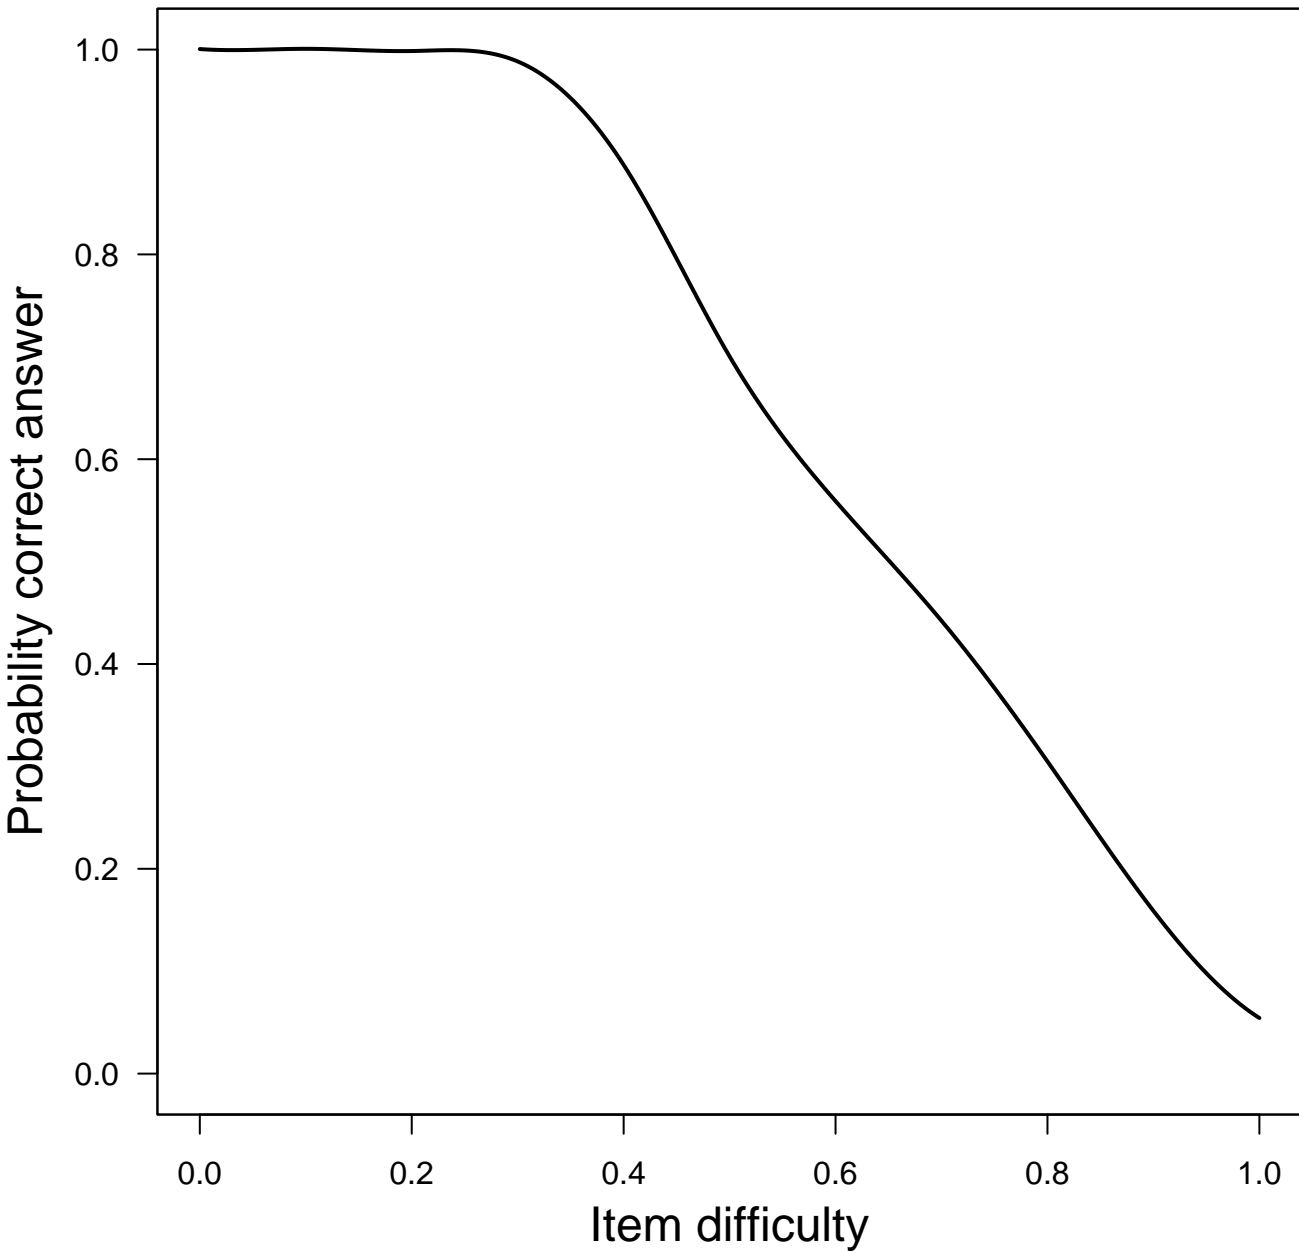



**PRF (resplD # 16)**

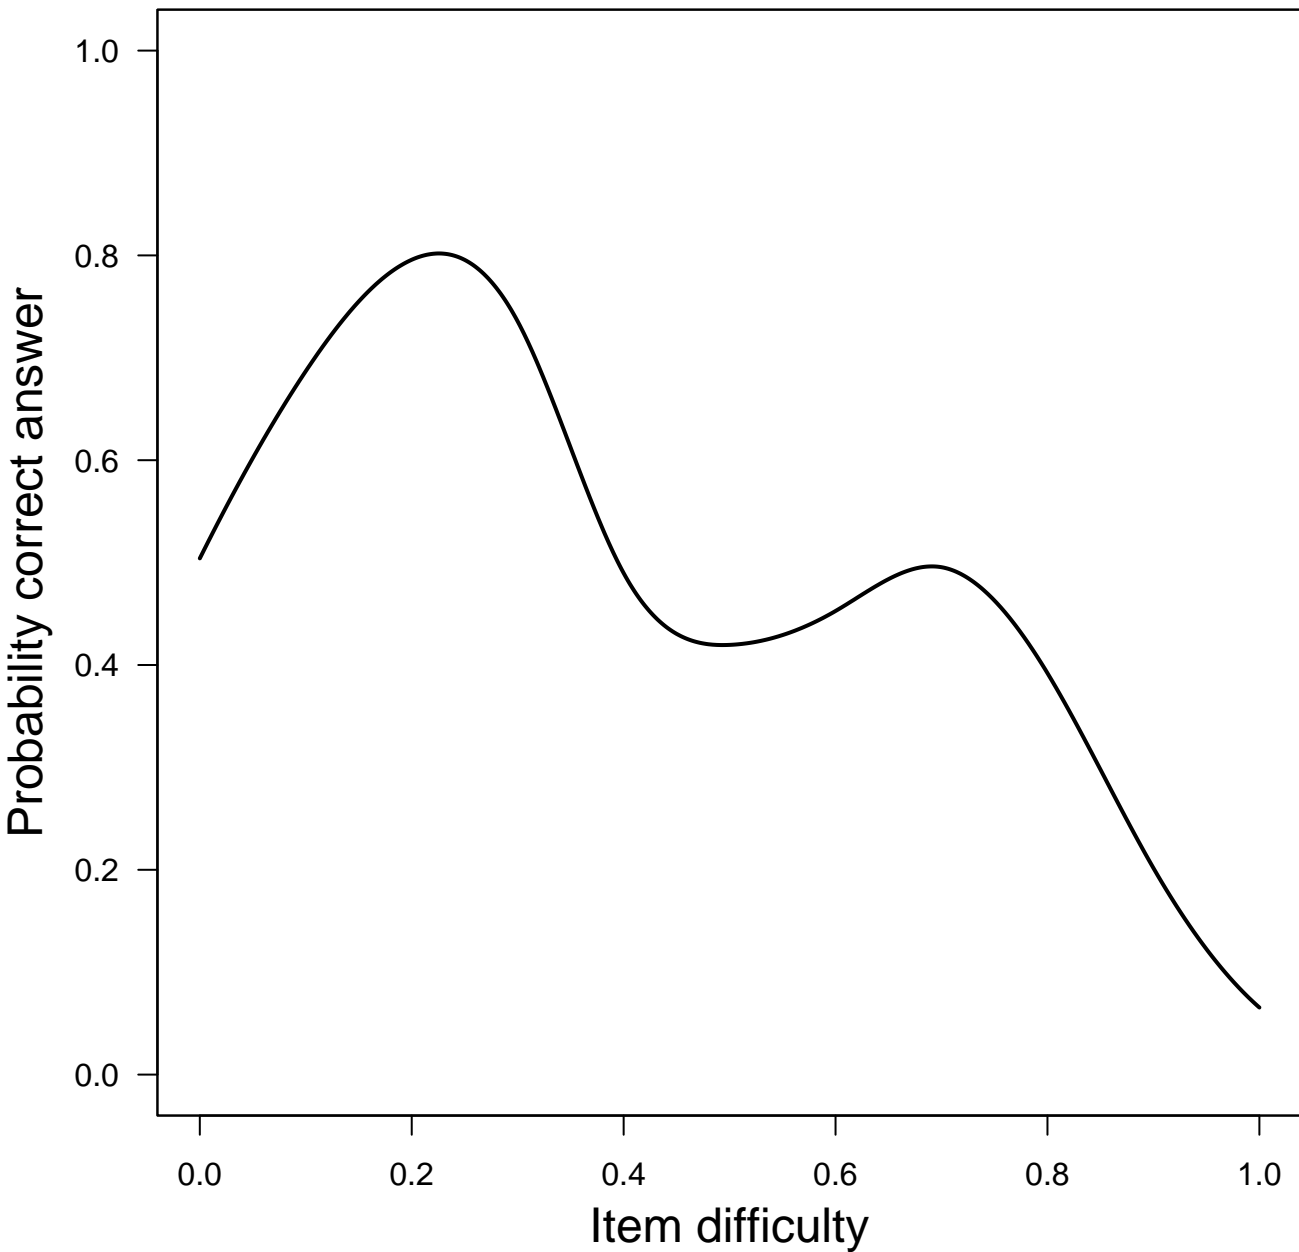

**PRF (resplD # 19)**

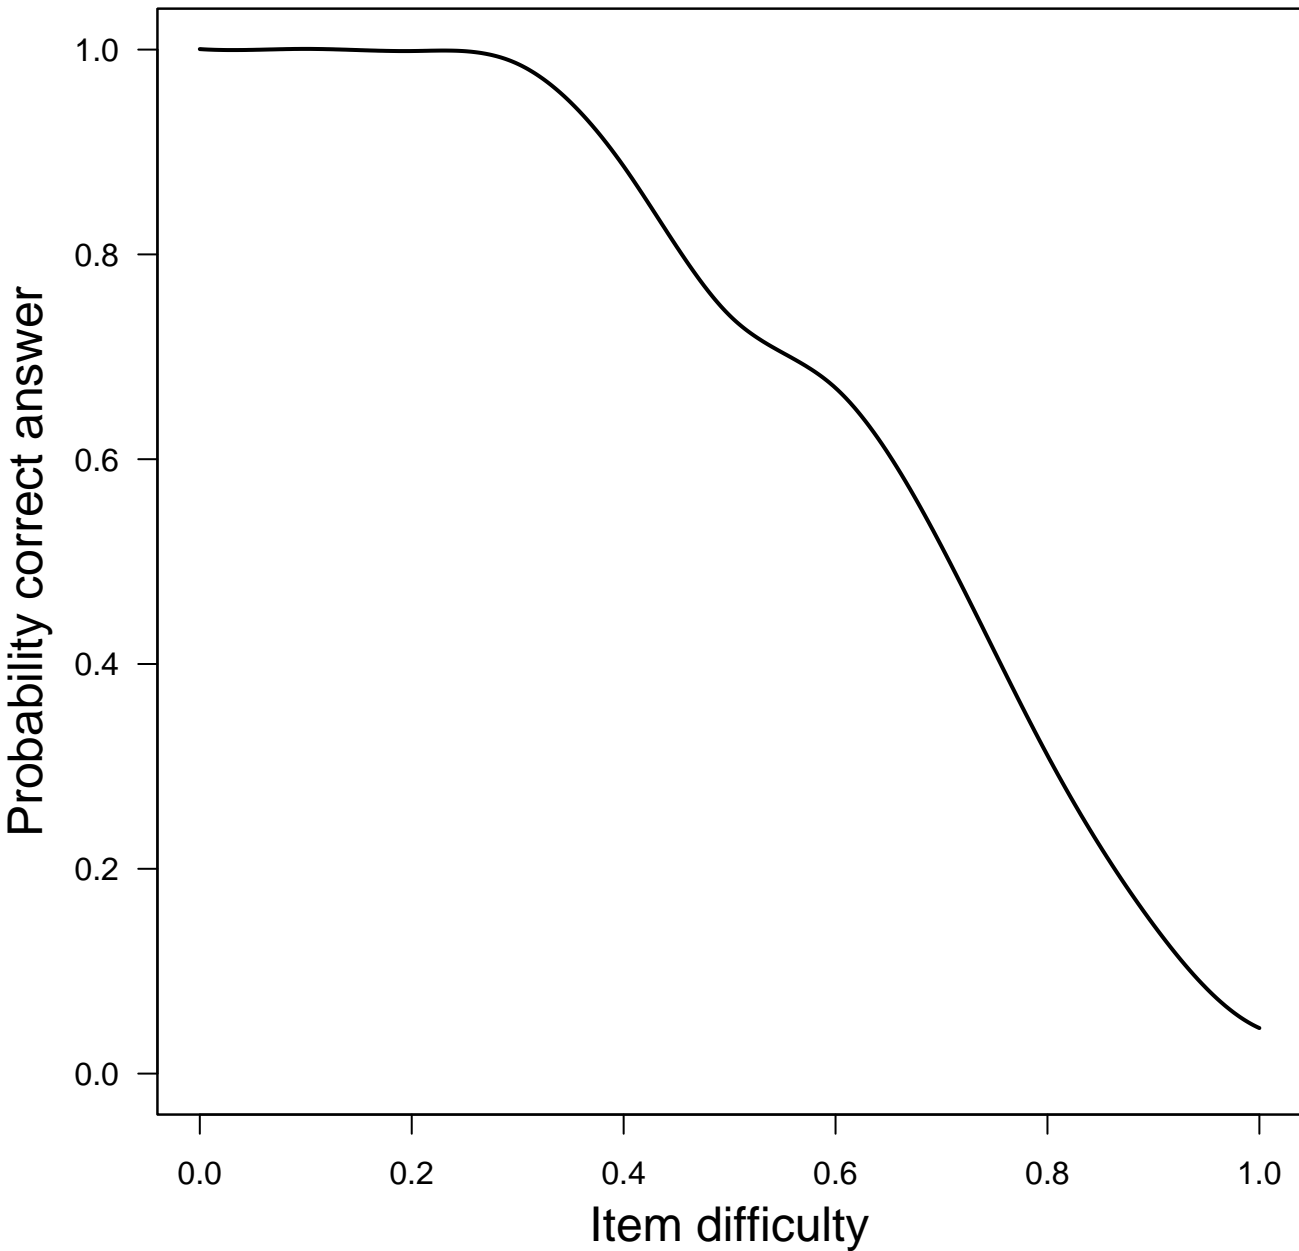

**PRF (resplD # 25)**

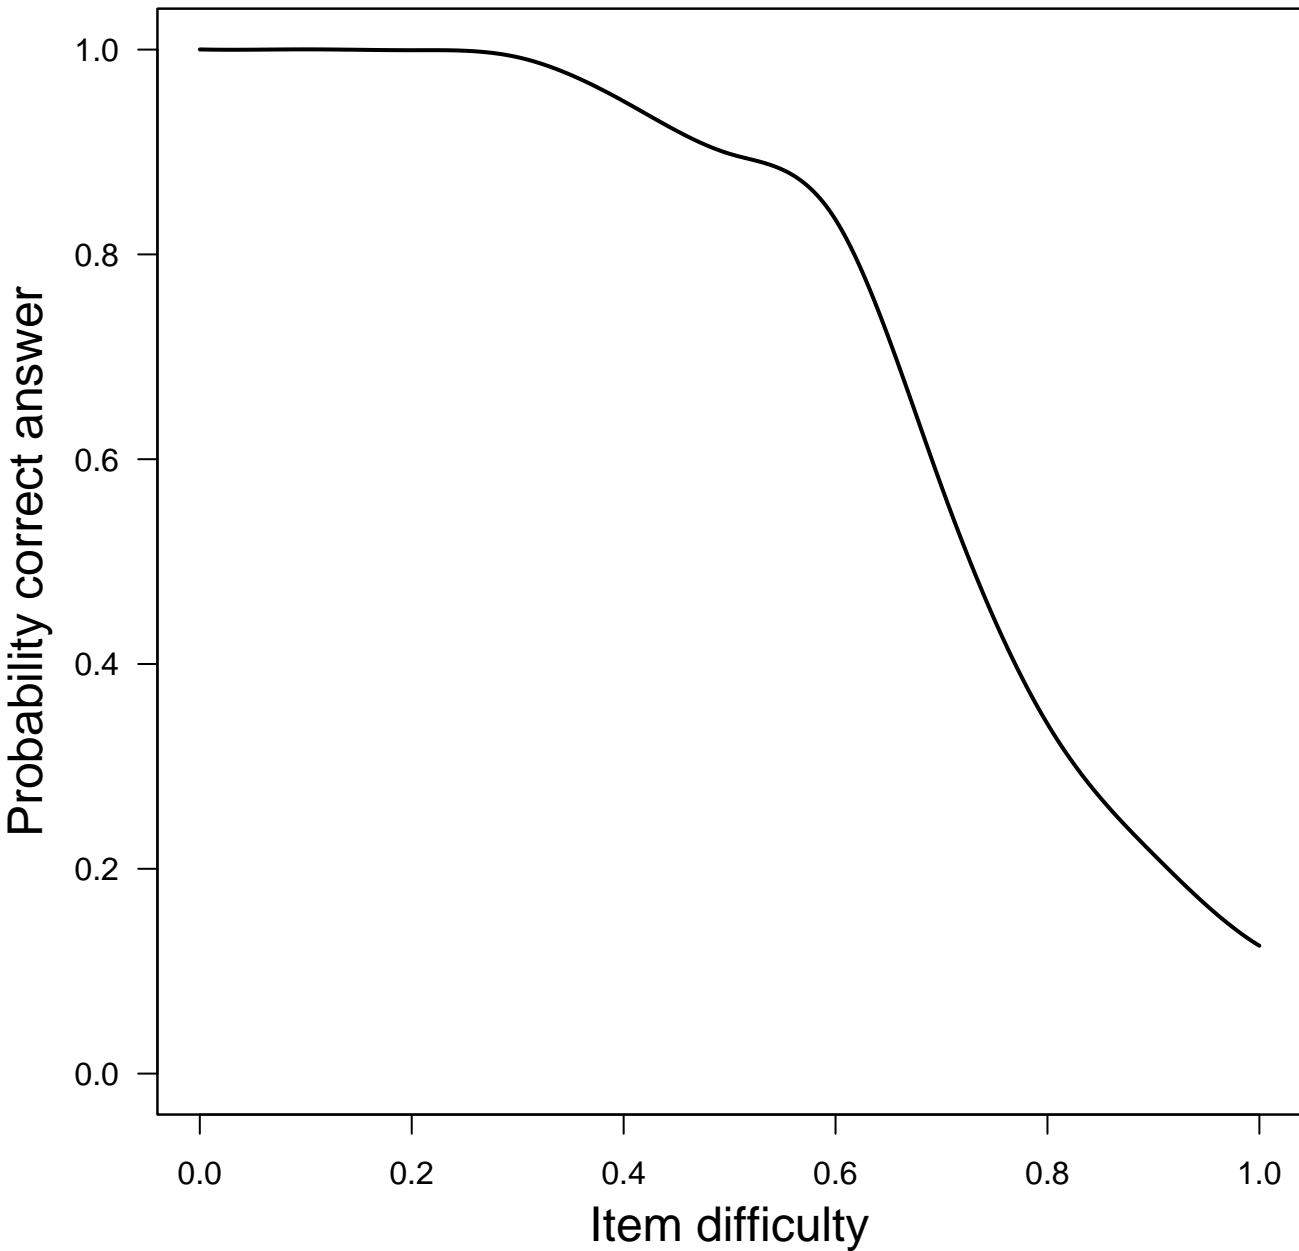

# PRF (resplD # 26)

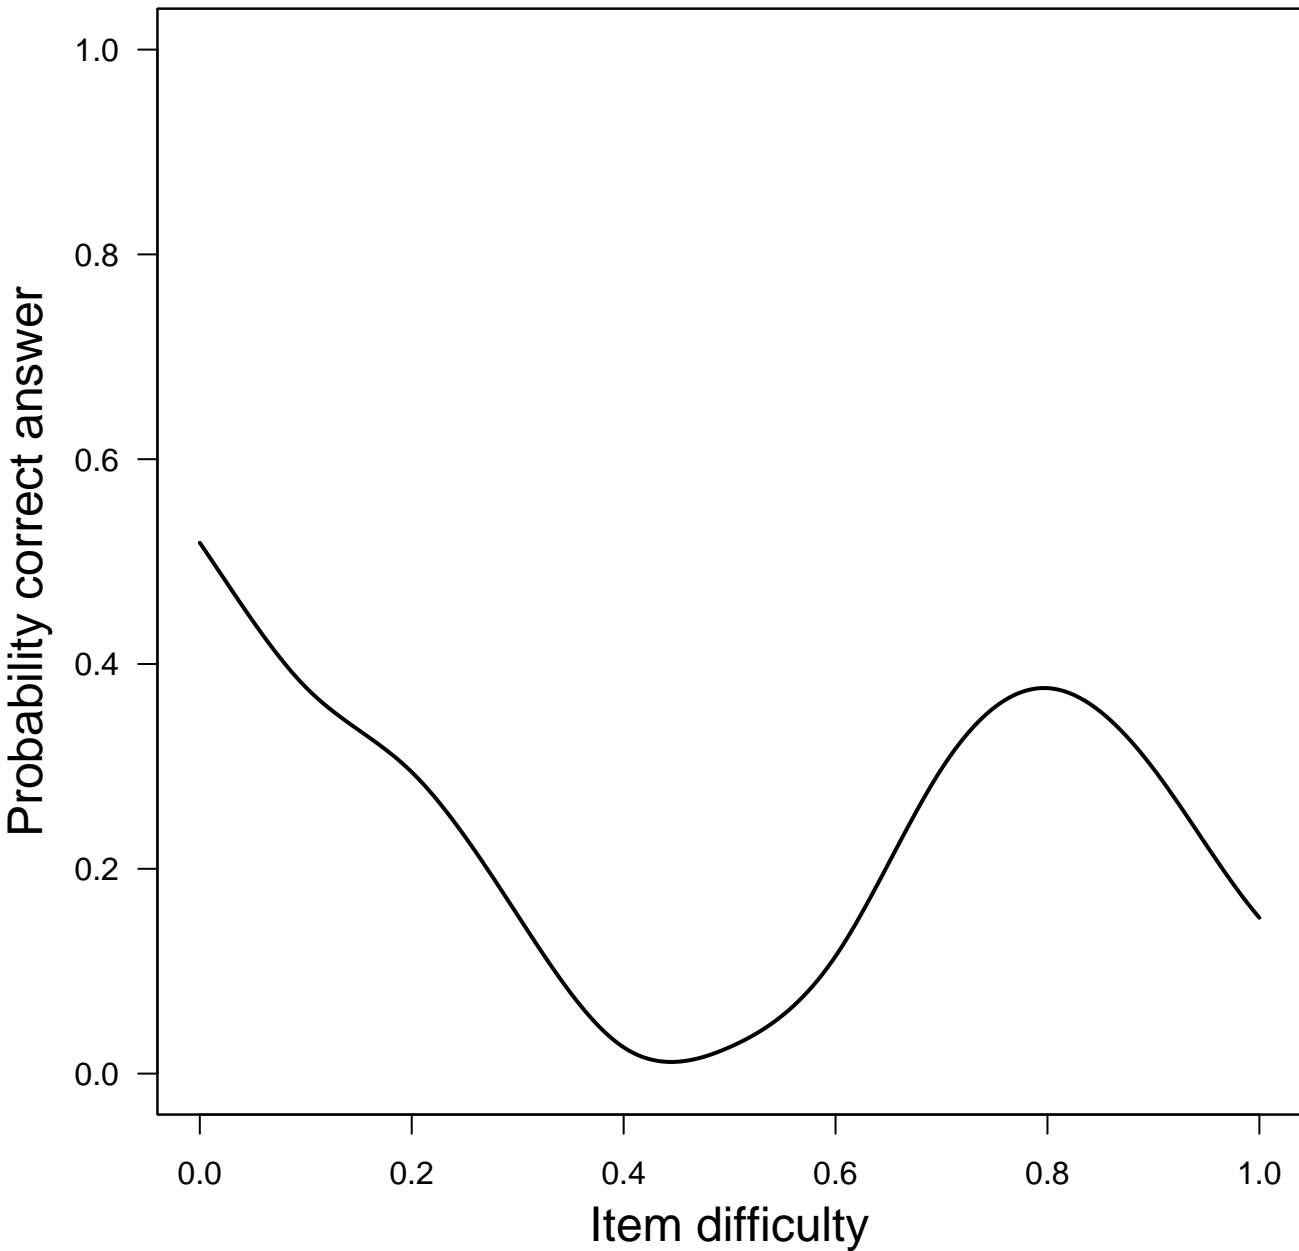

# PRF (respID # 27)

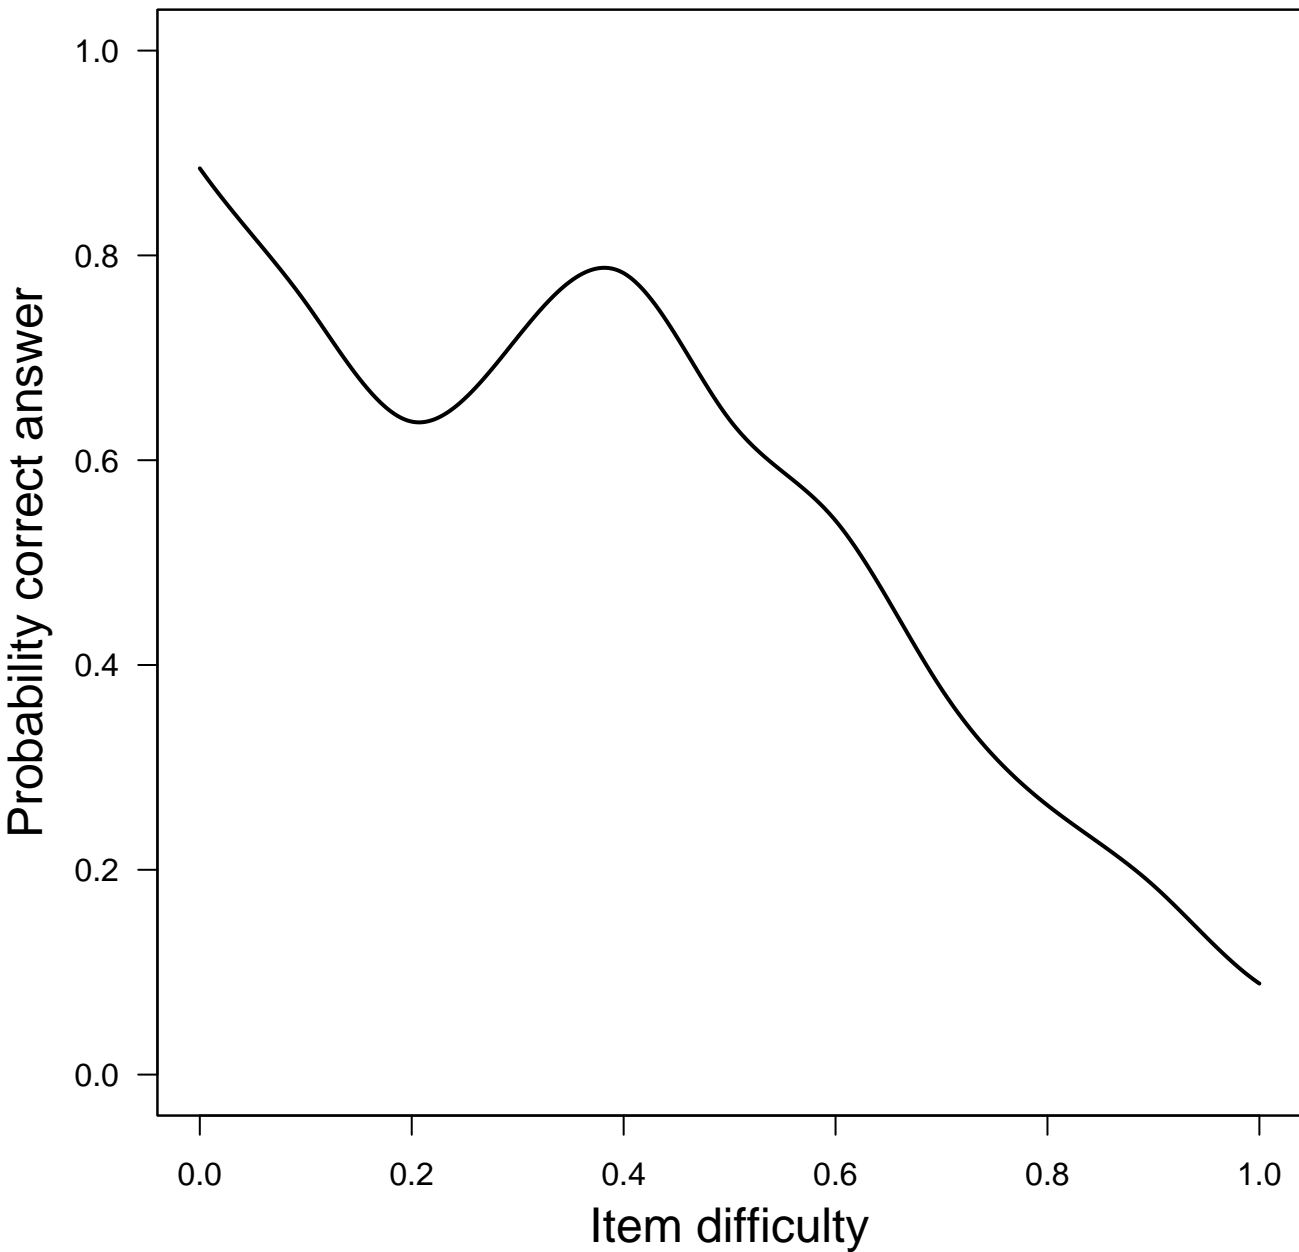

**PRF (respID # 28)**

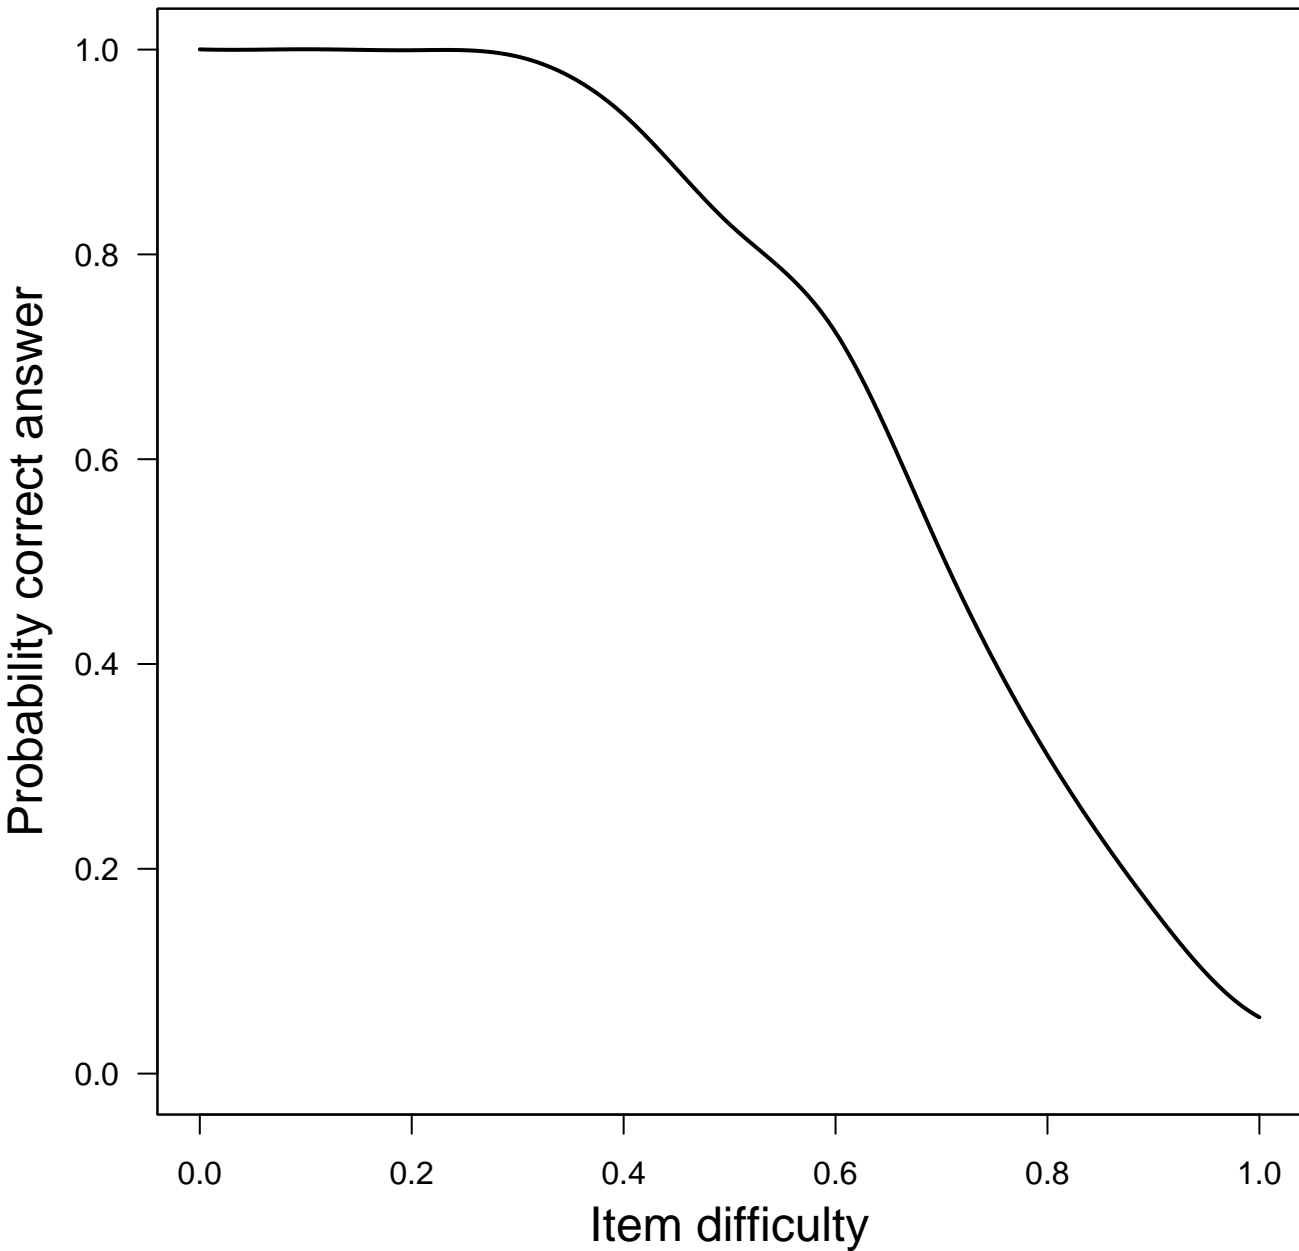

**PRF (resplD # 30)**

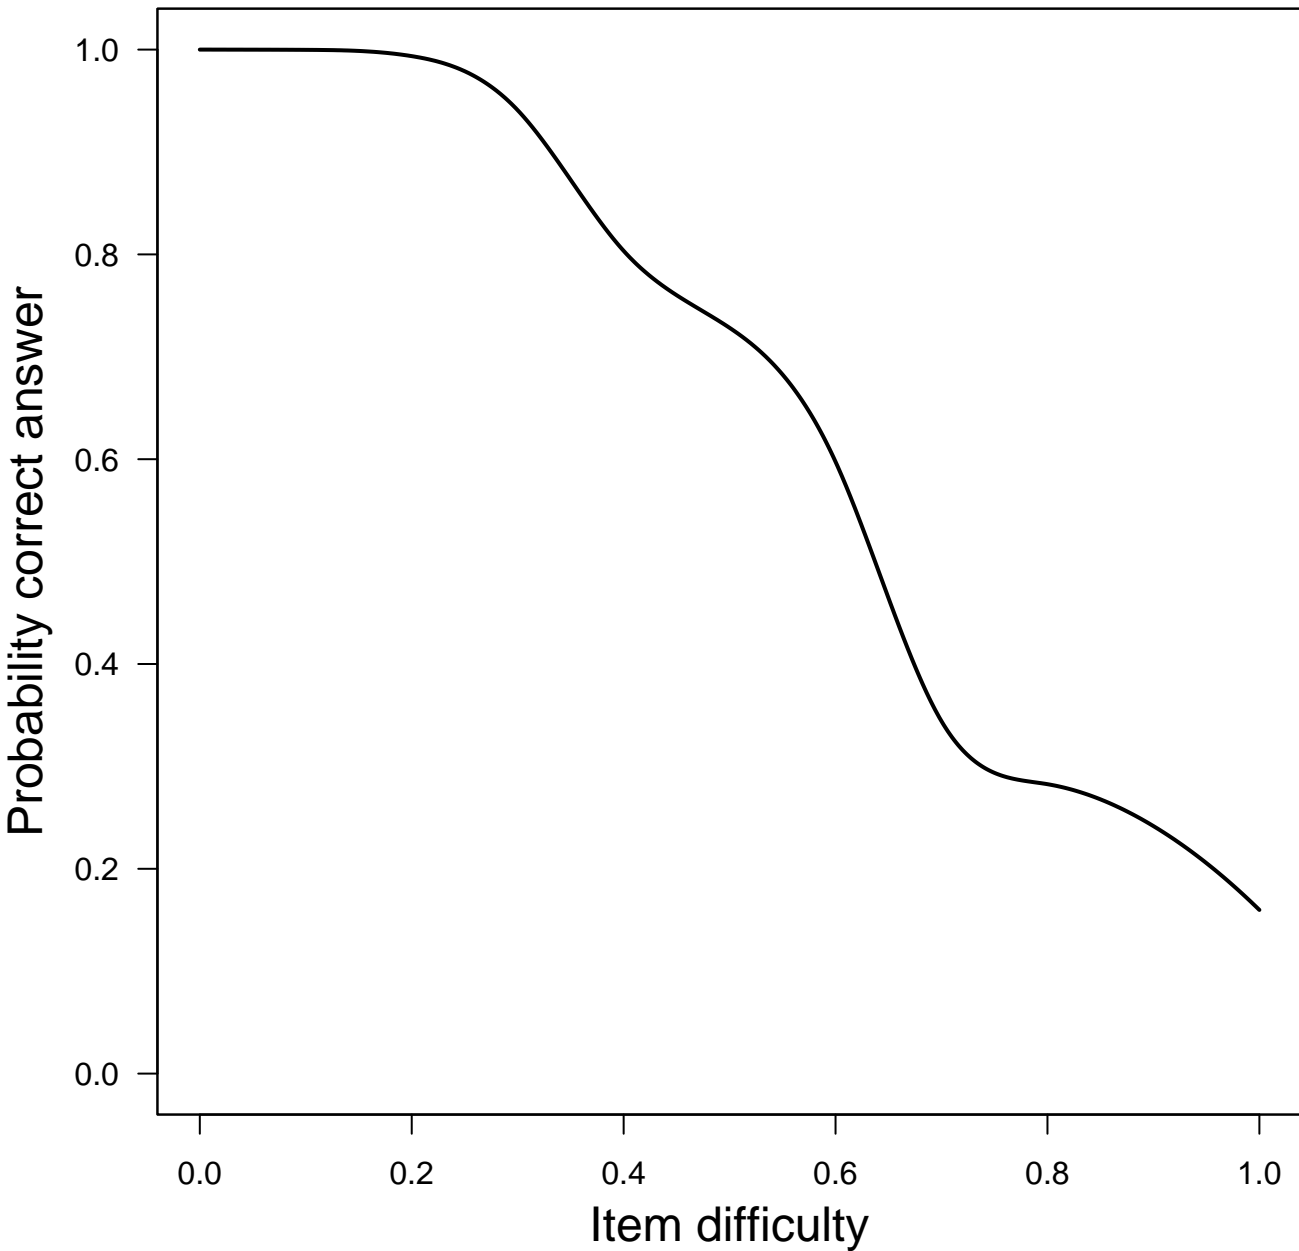

**PRF (respID # 31)**

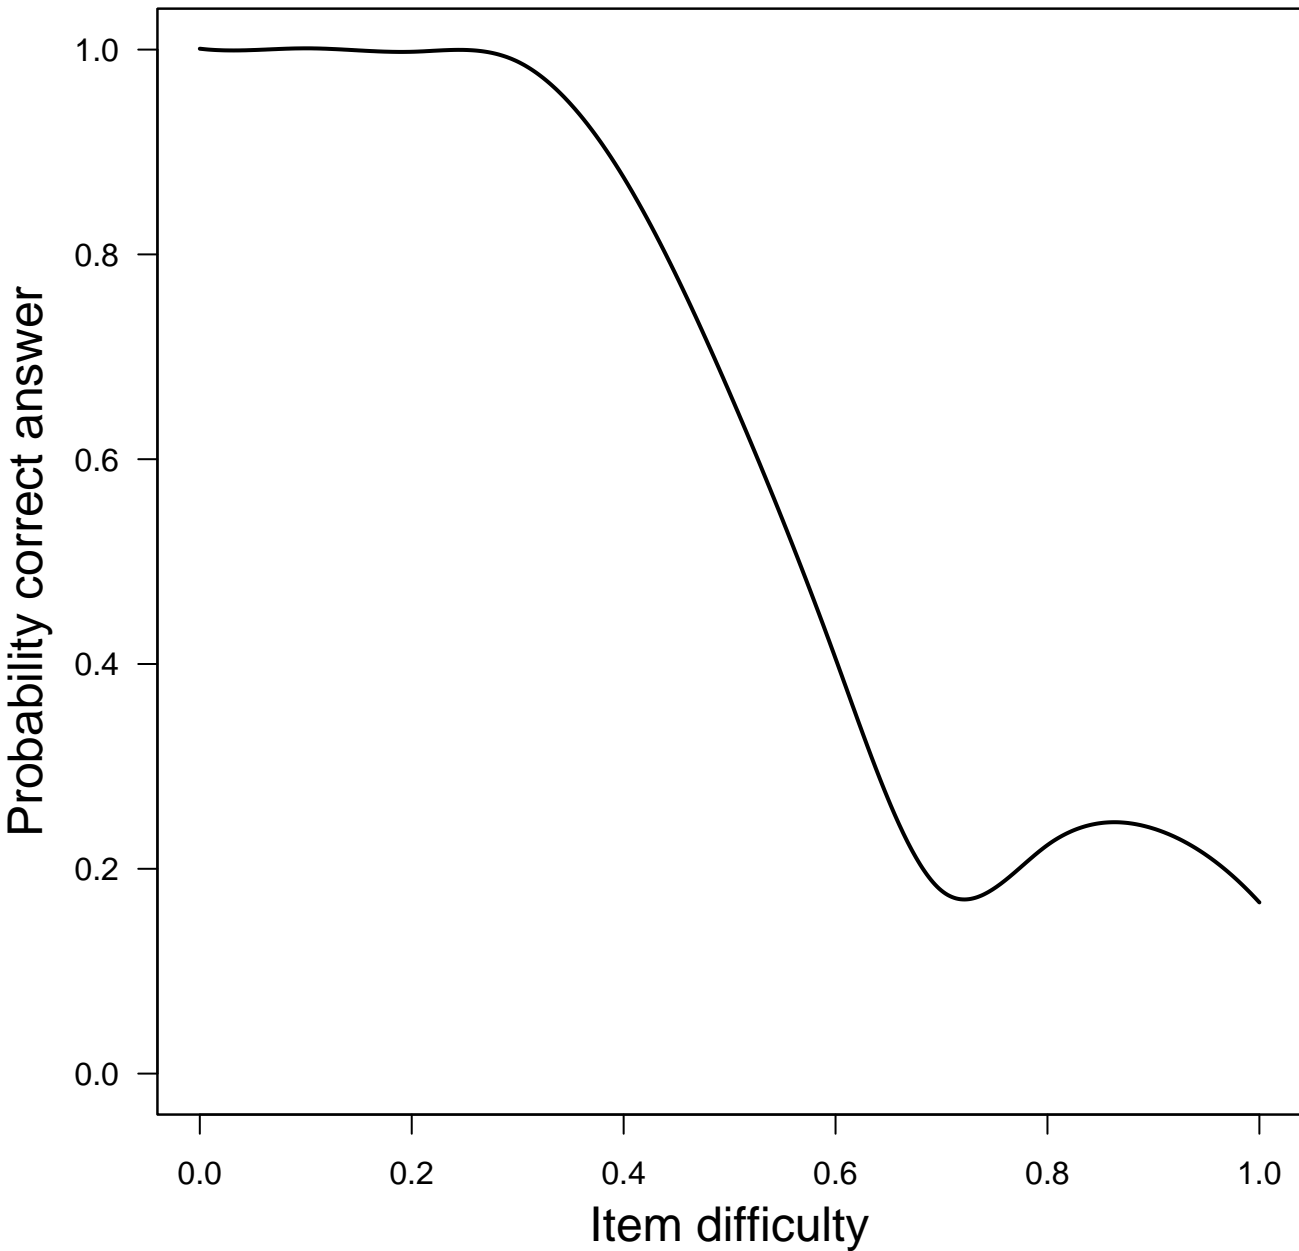



# PRF (respID # 32)

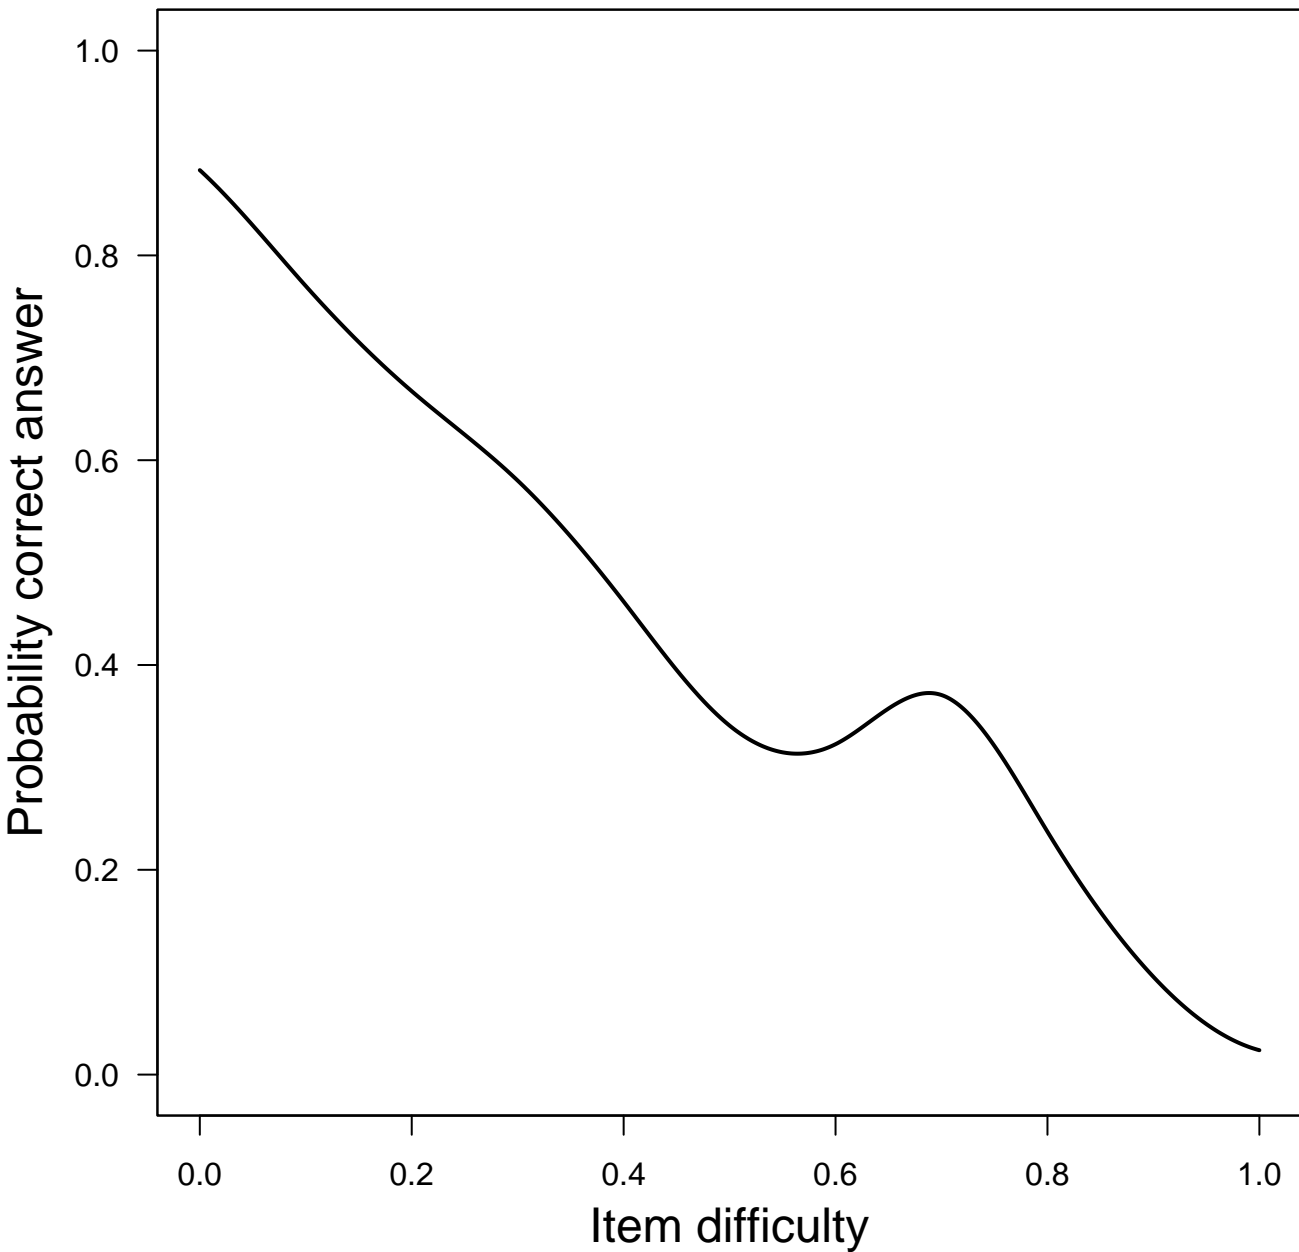

**PRF (resplD # 33)**

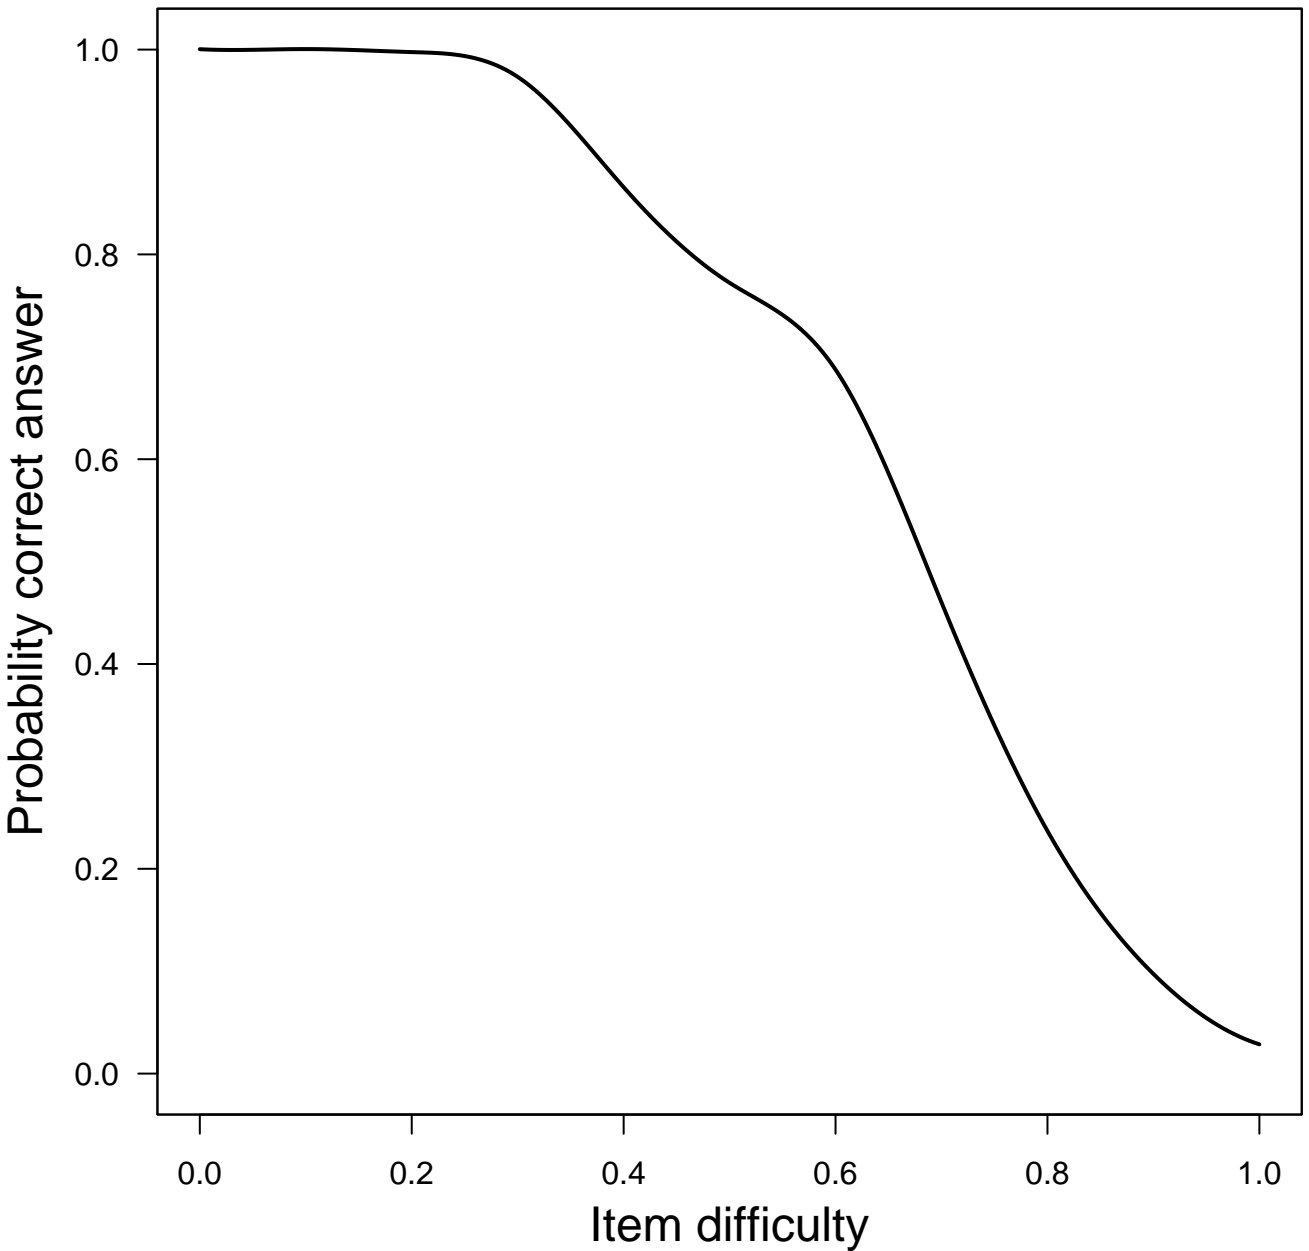

# PRF (respID # 34)

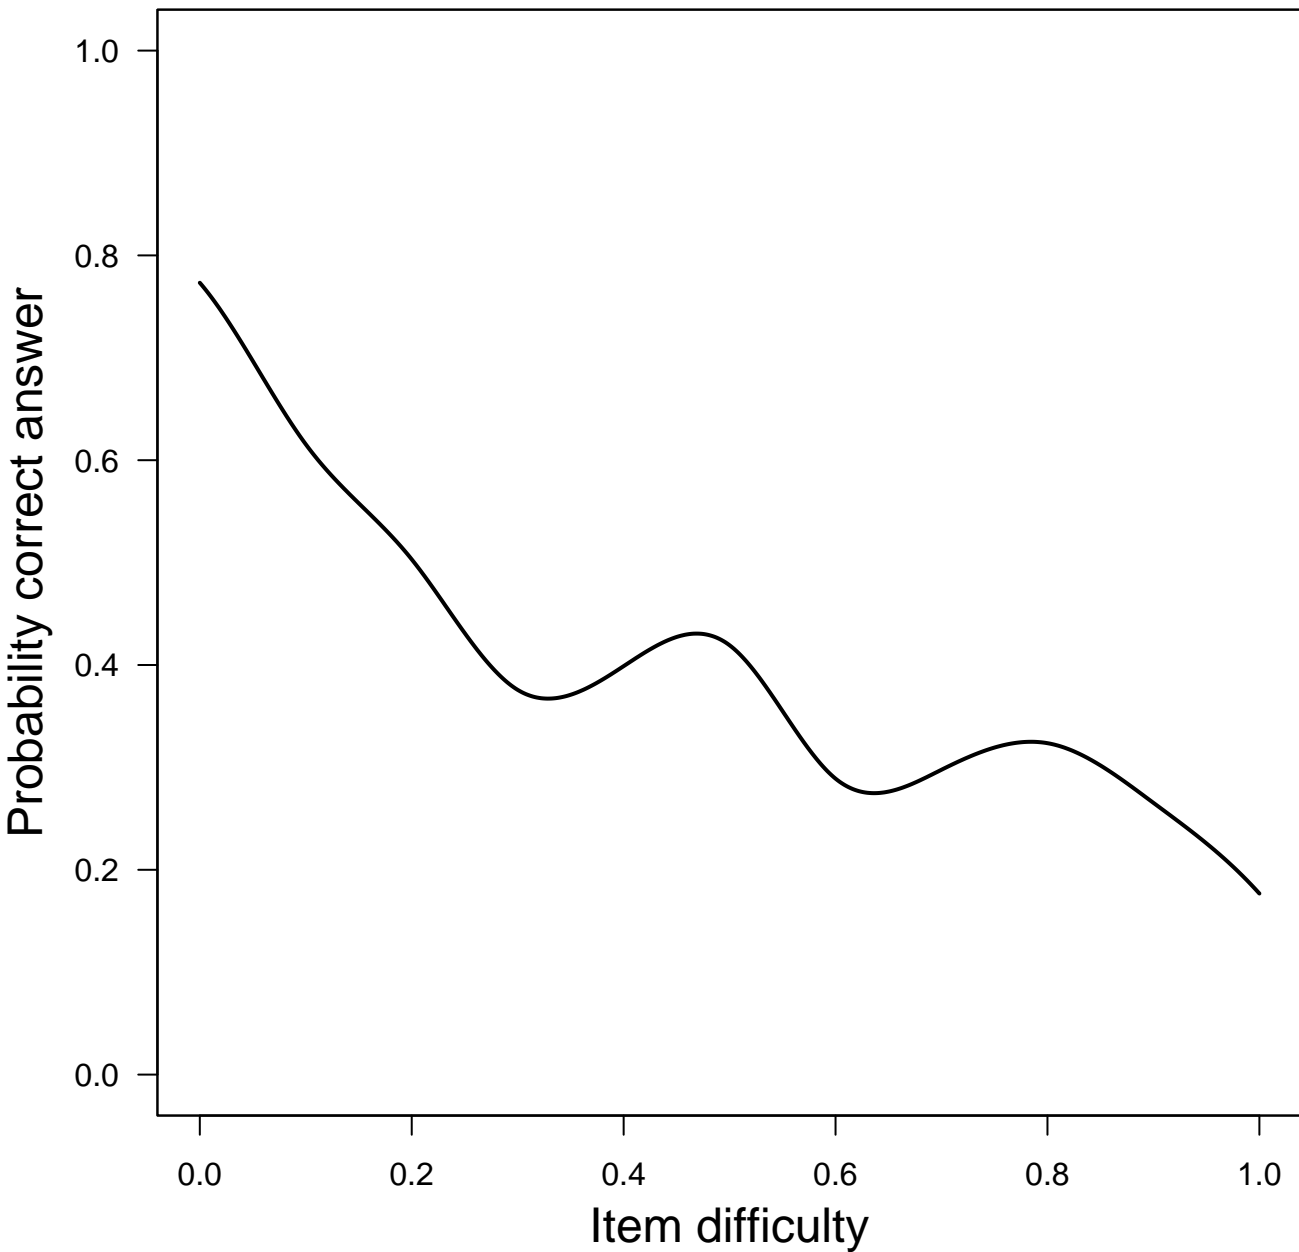

**PRF (respID # 35)**

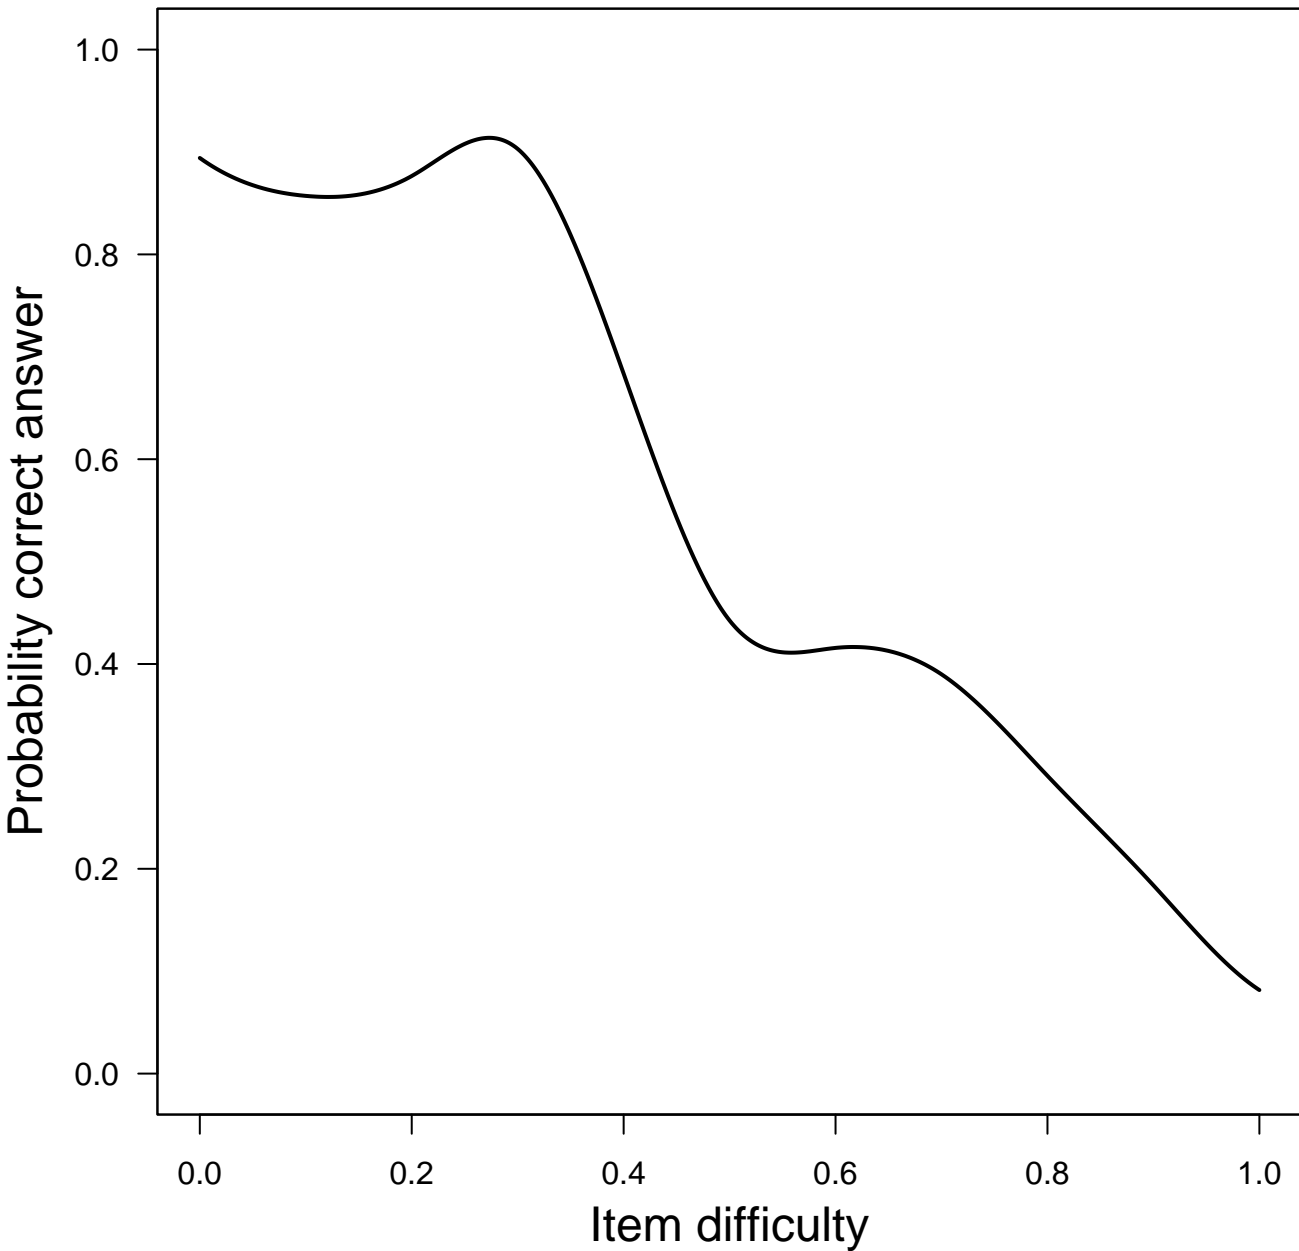

# PRF (respID # 37)

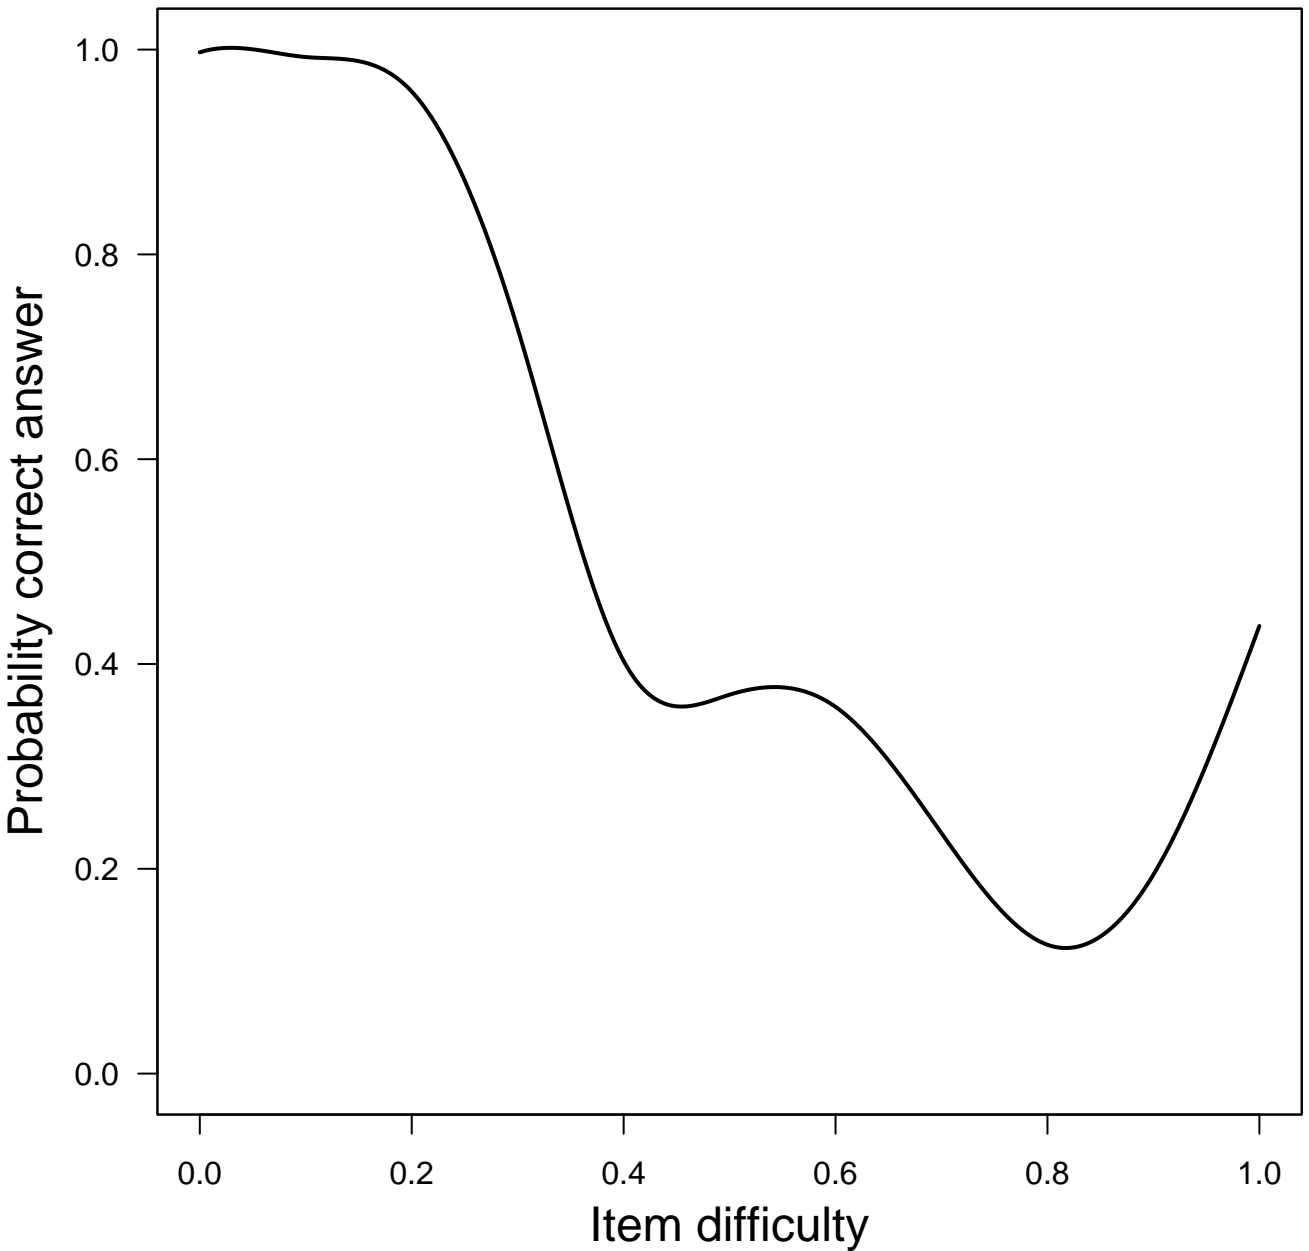

**PRF (resplD # 38)**

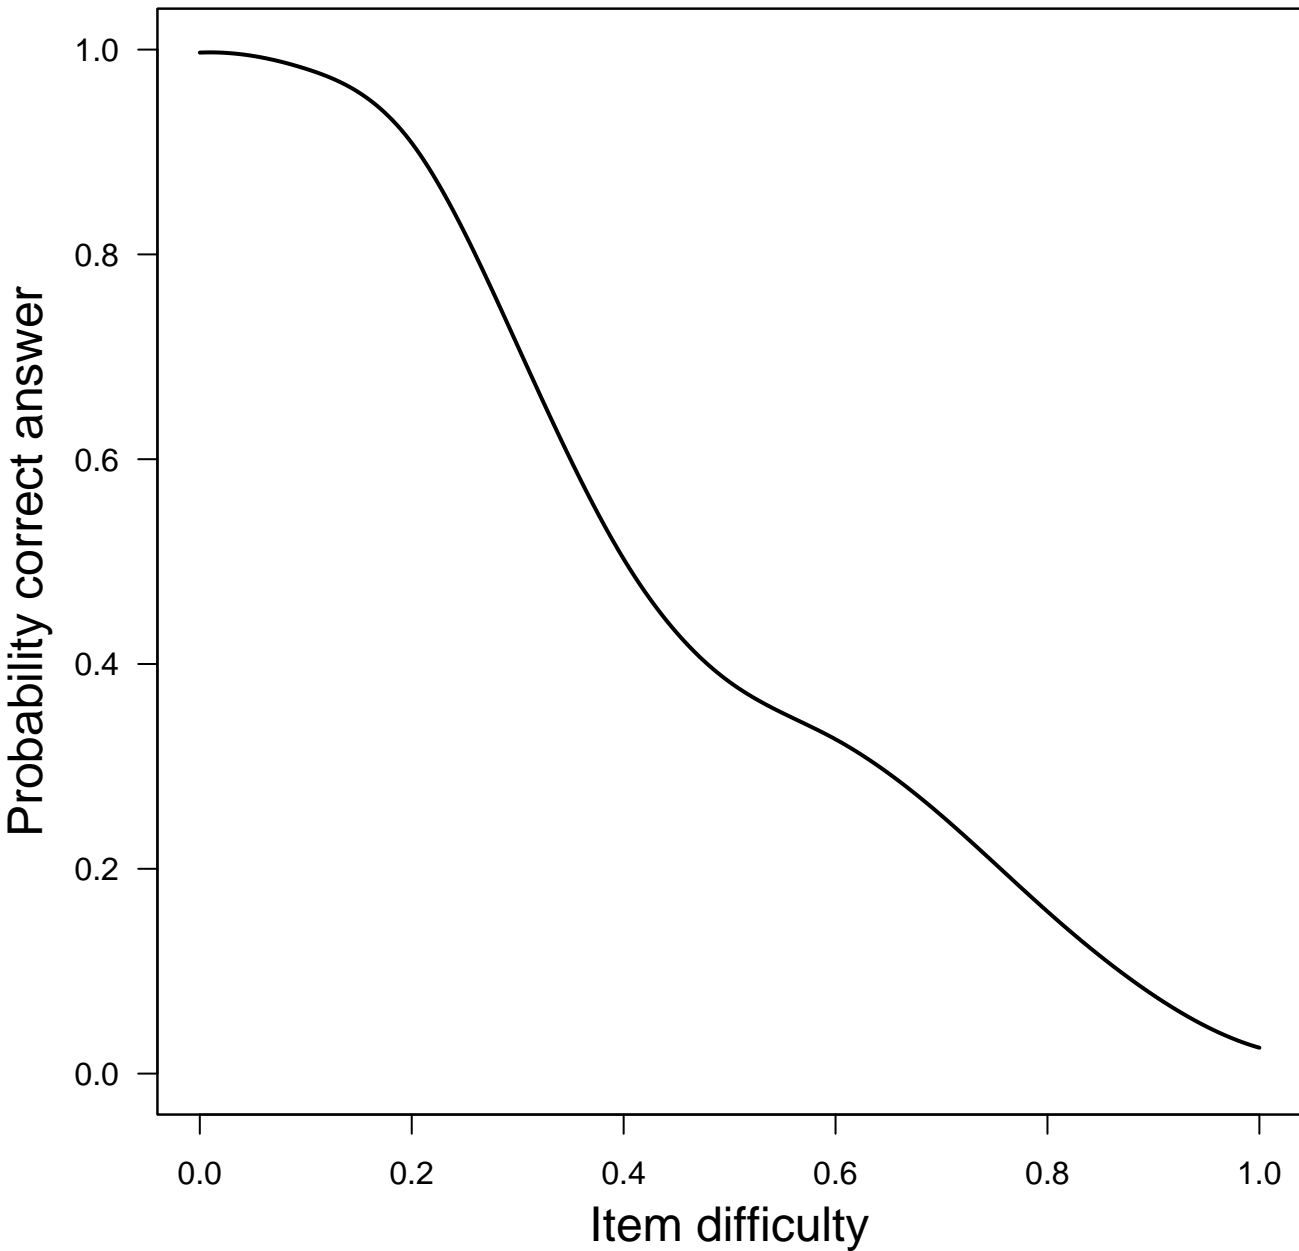

# PRF (resplD # 39)

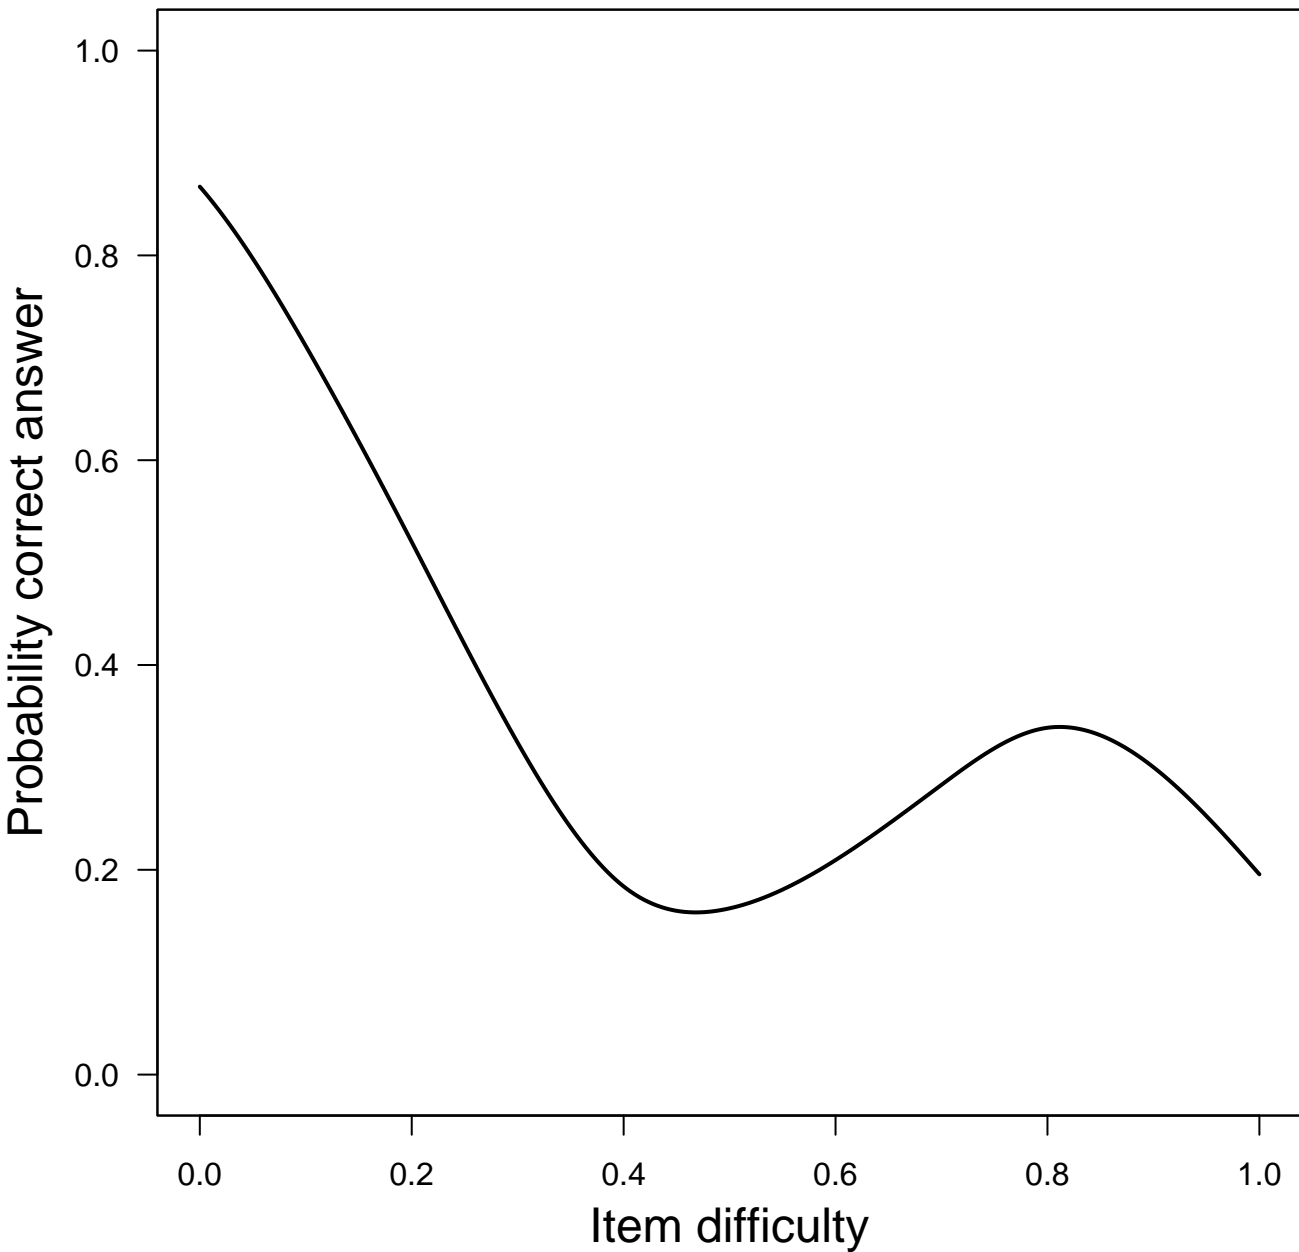

# PRF (resplD # 40)

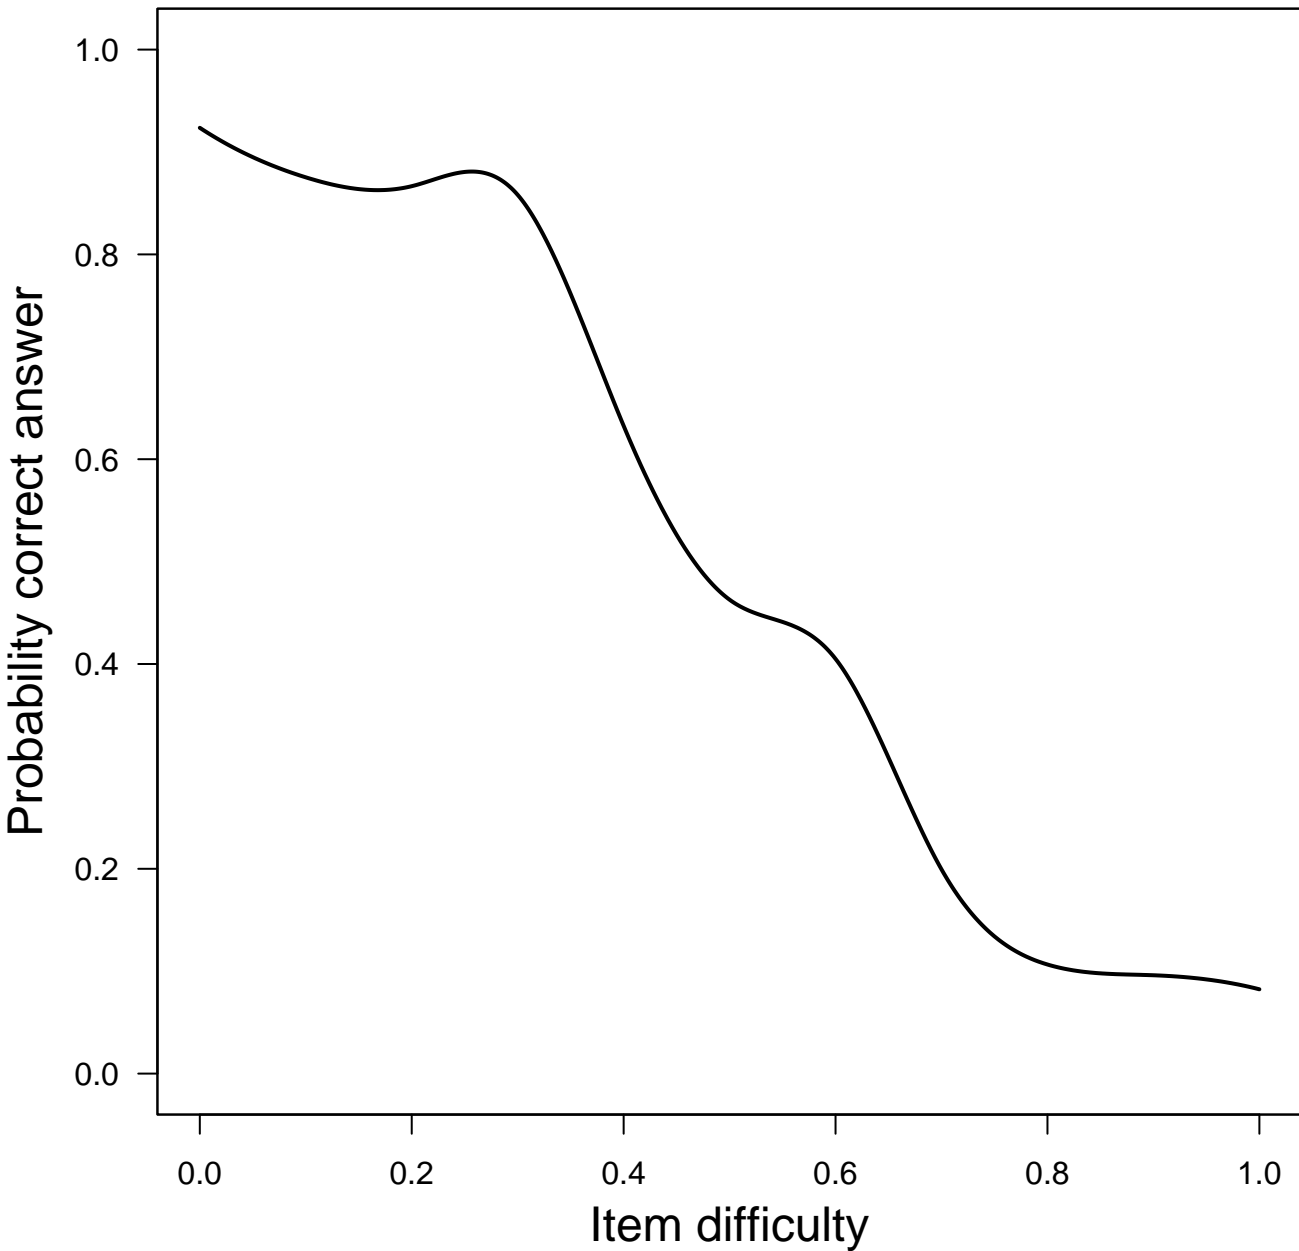



# PRF (respID # 41)

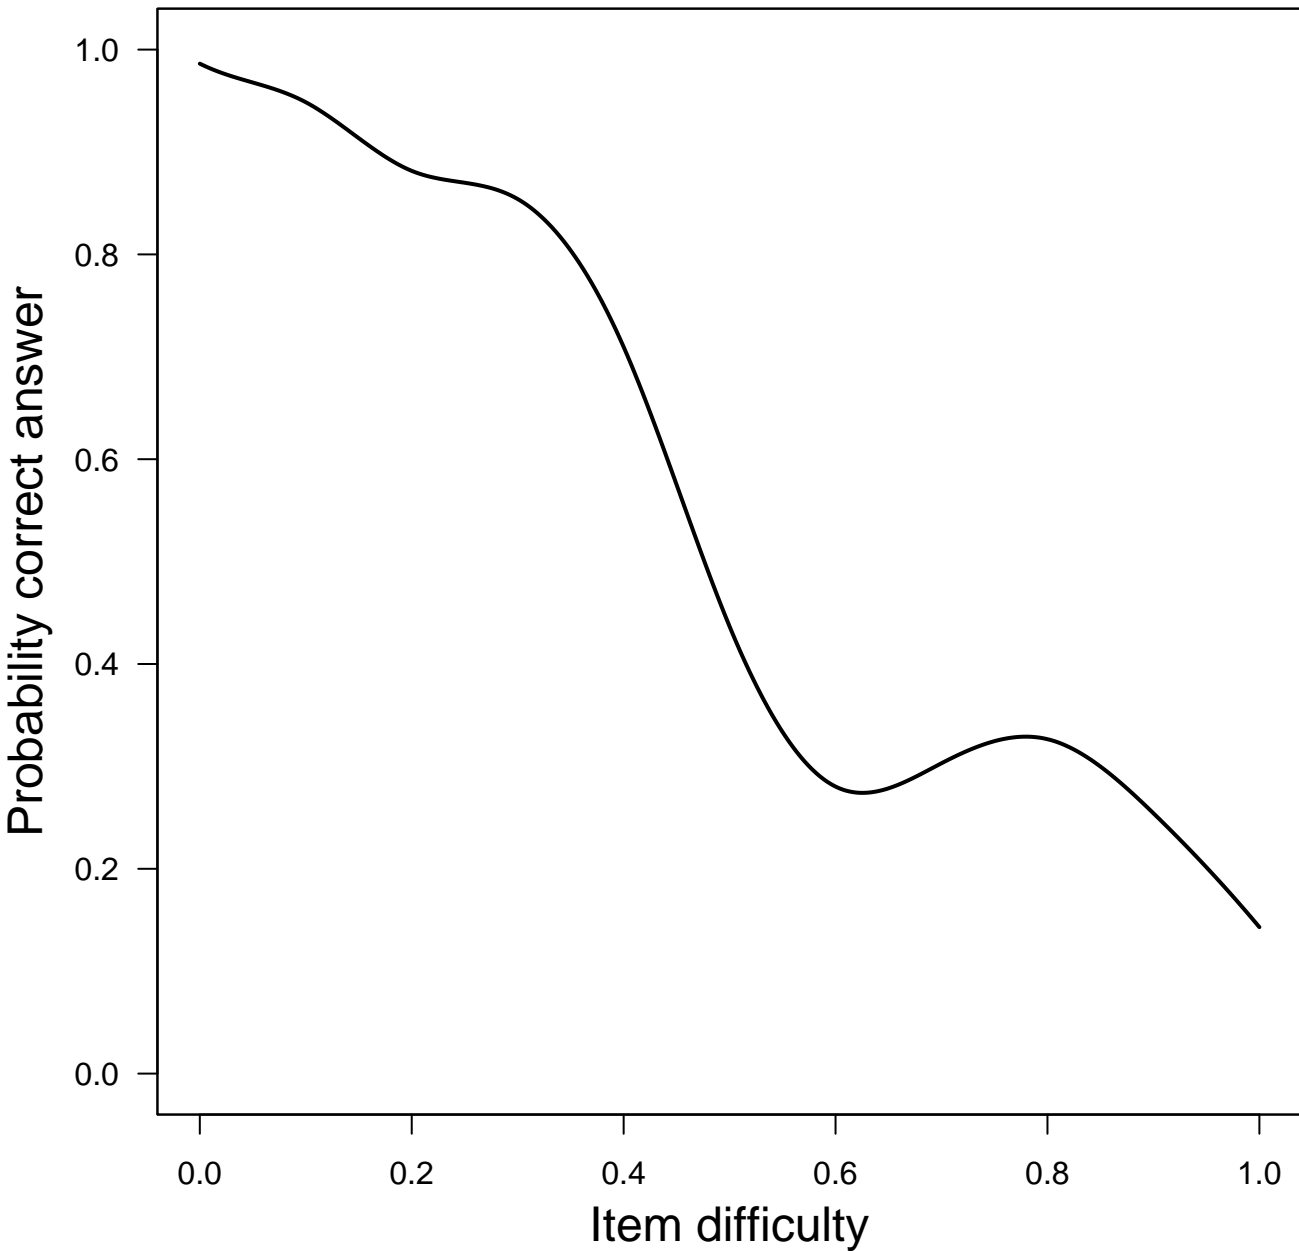

**PRF (resplD # 42)**

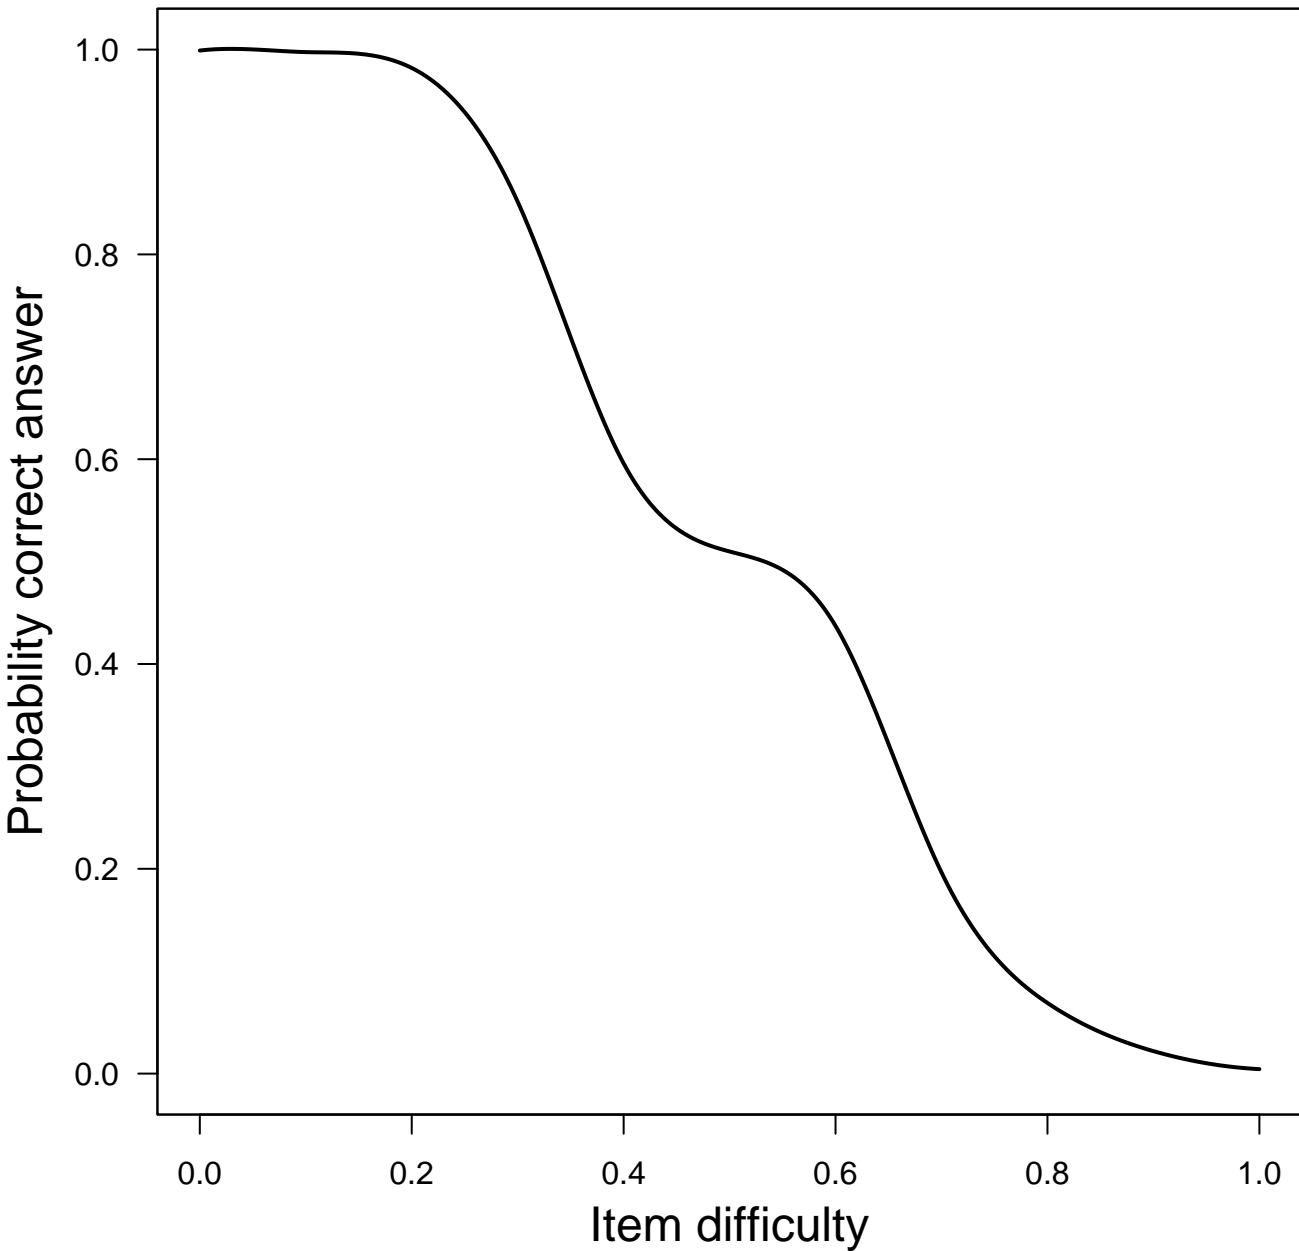

**PRF (resplD # 43)**

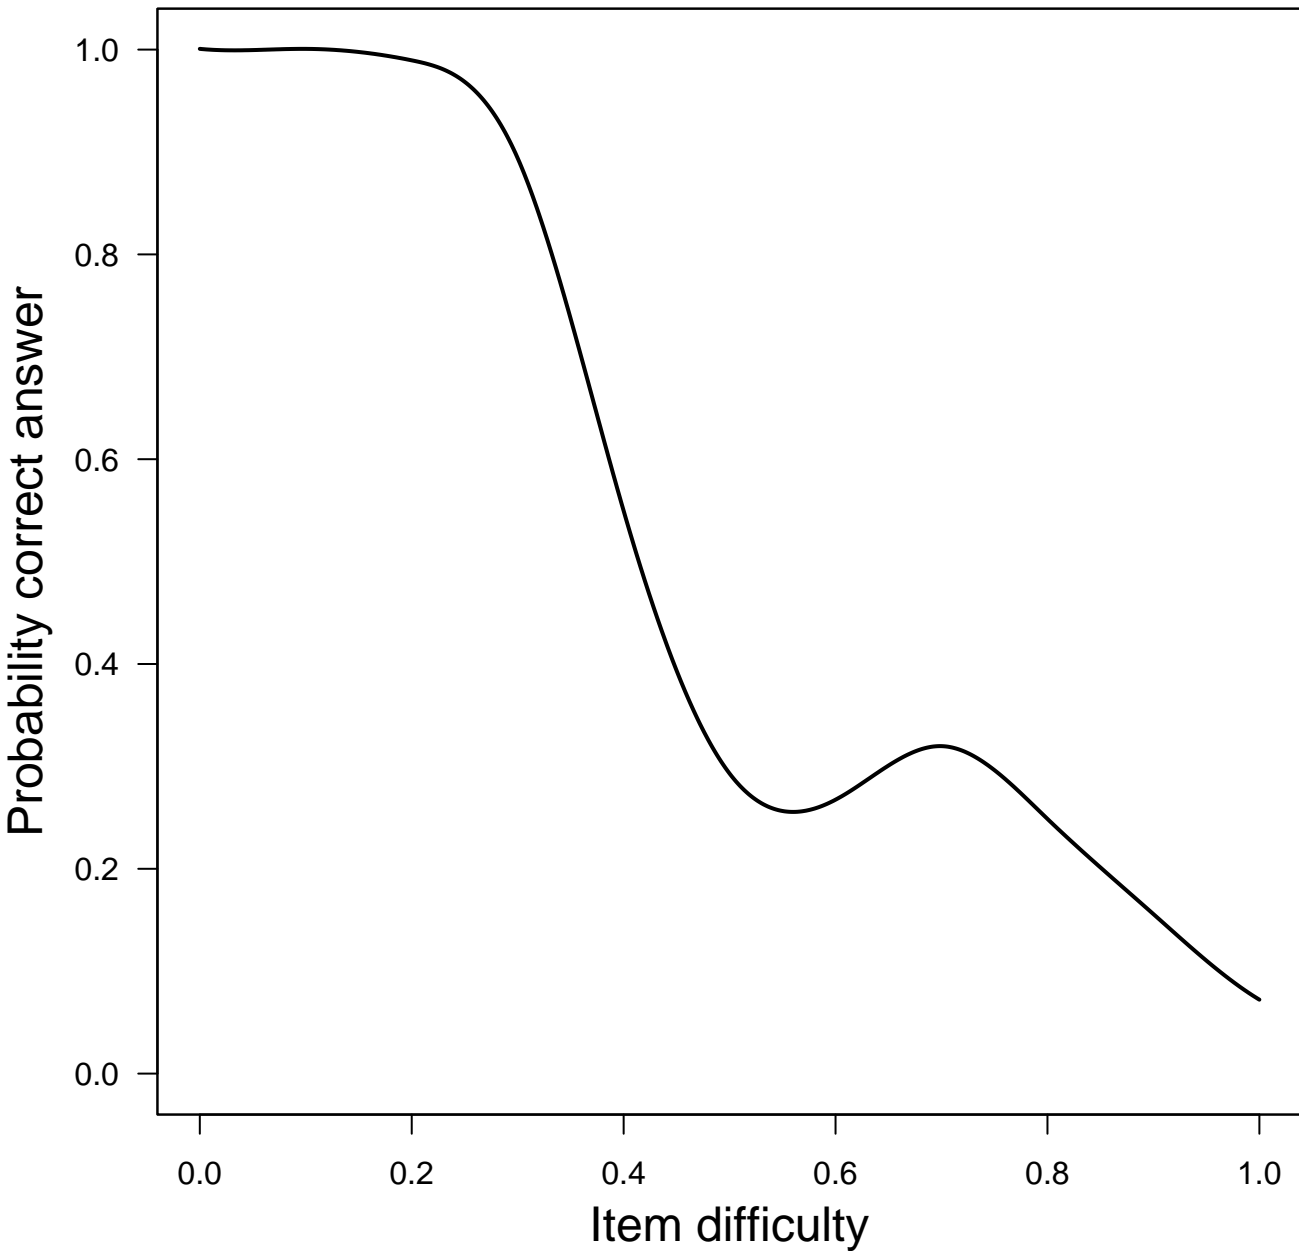

**PRF (resplD # 47)**

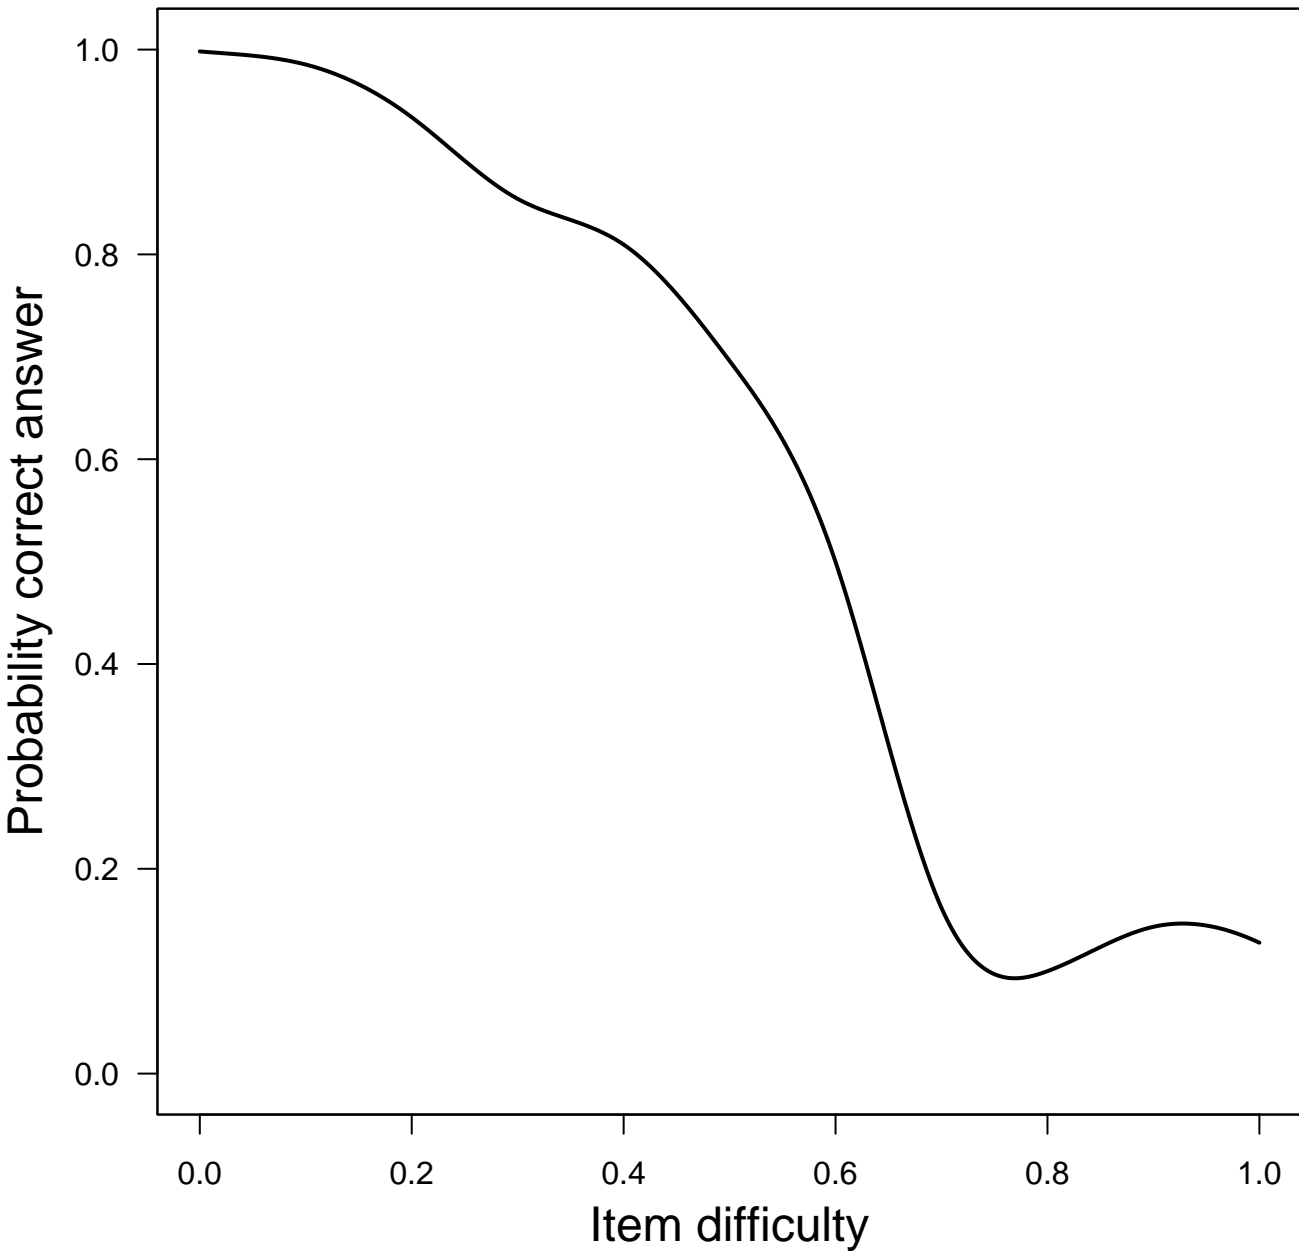

# PRF (resplD # 48)

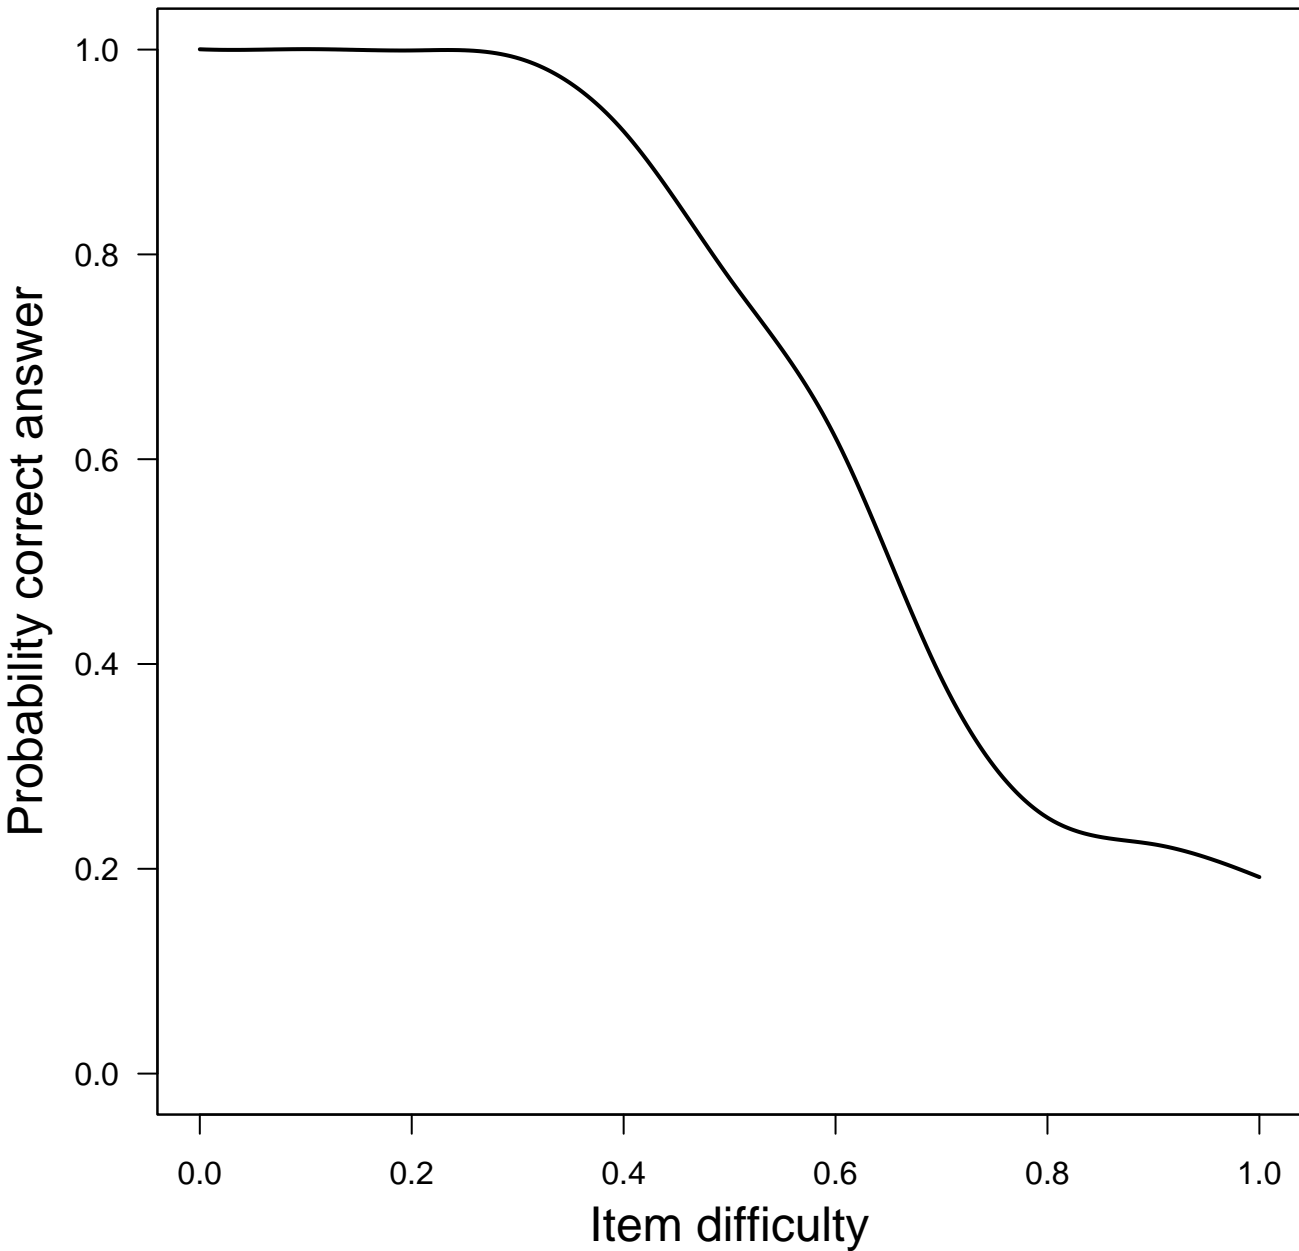

**PRF (respID # 51)**

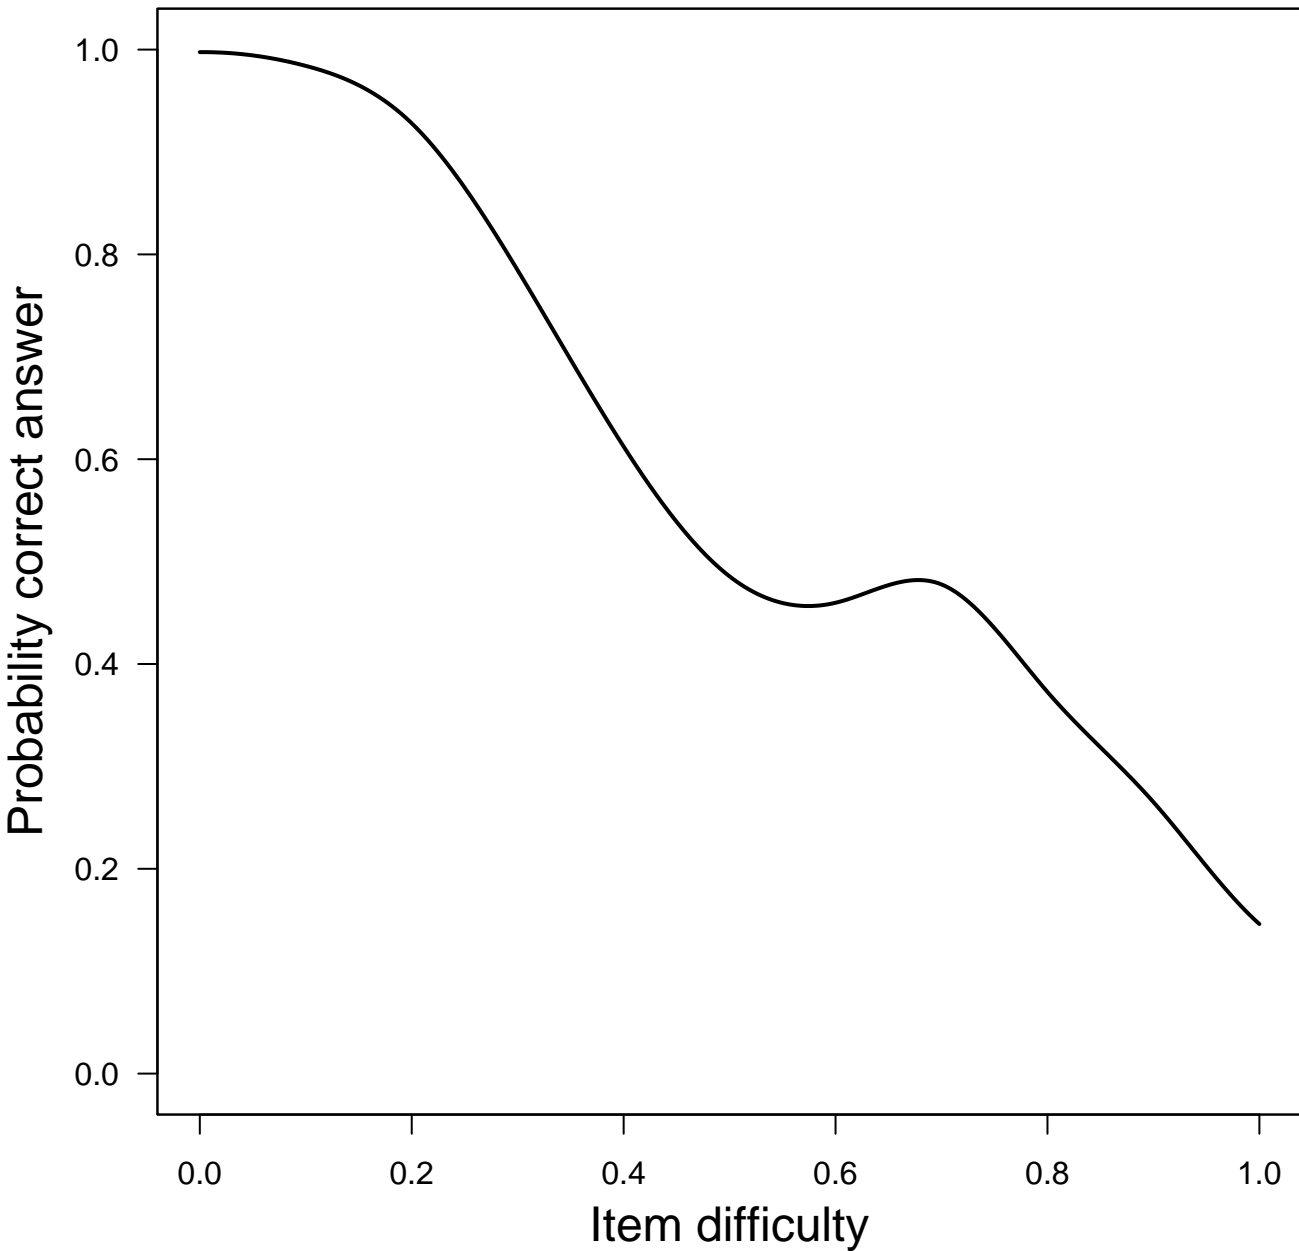

# PRF (resplD # 53)

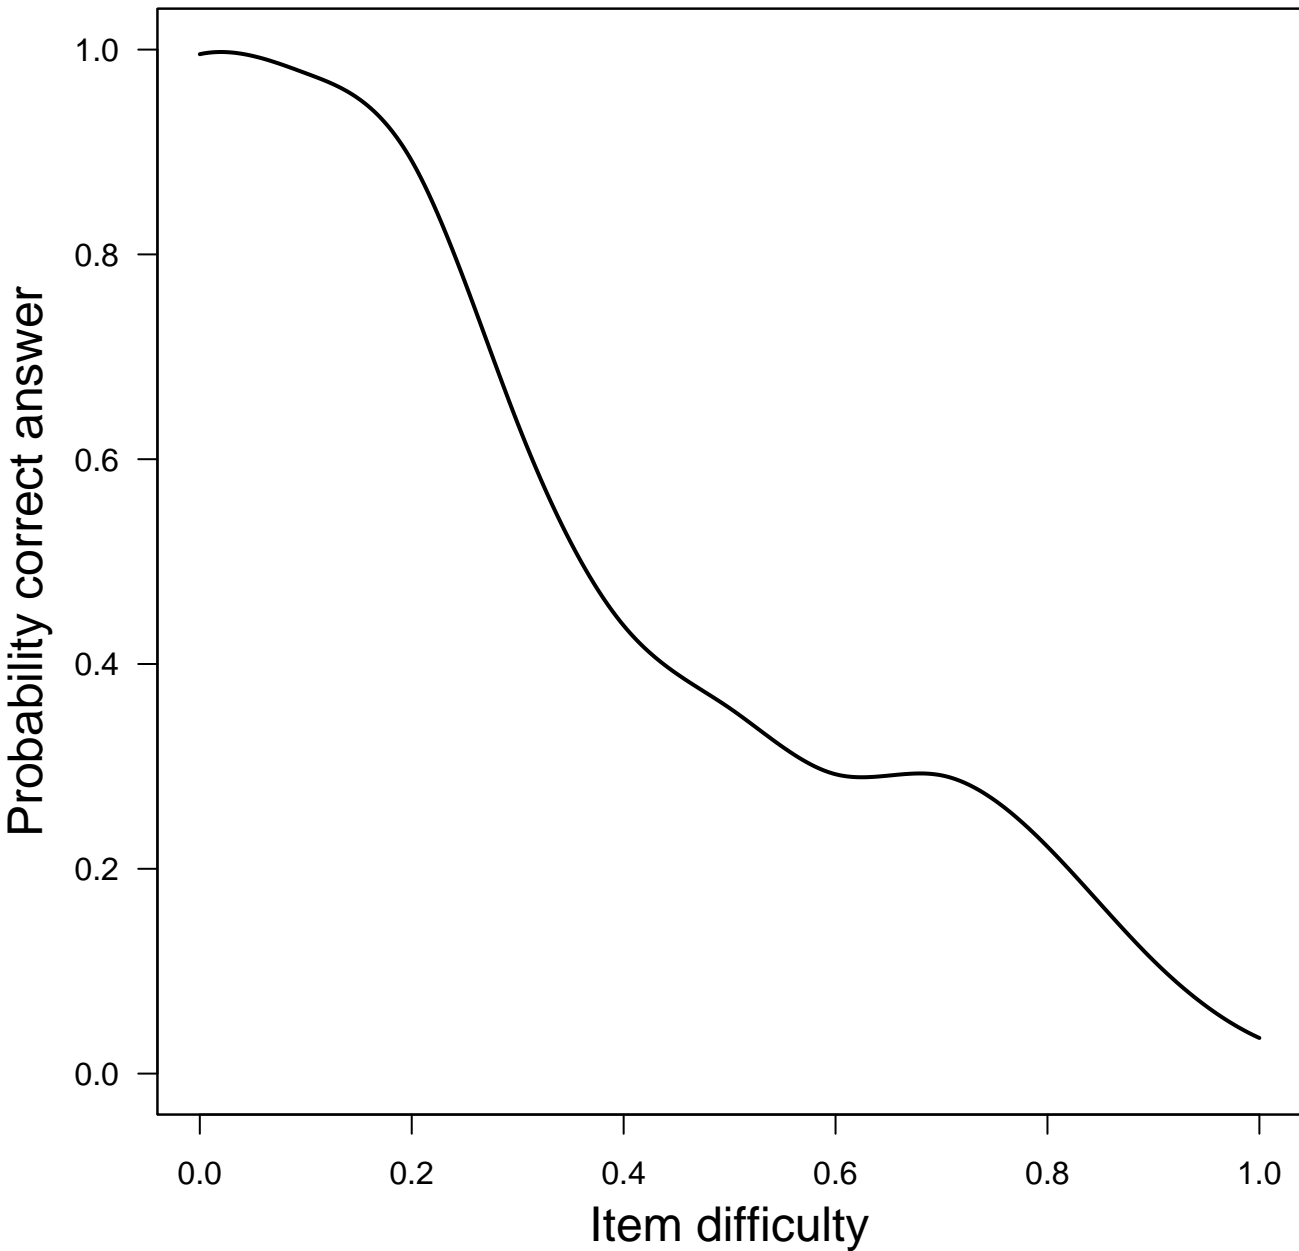

**PRF (respID # 54)**

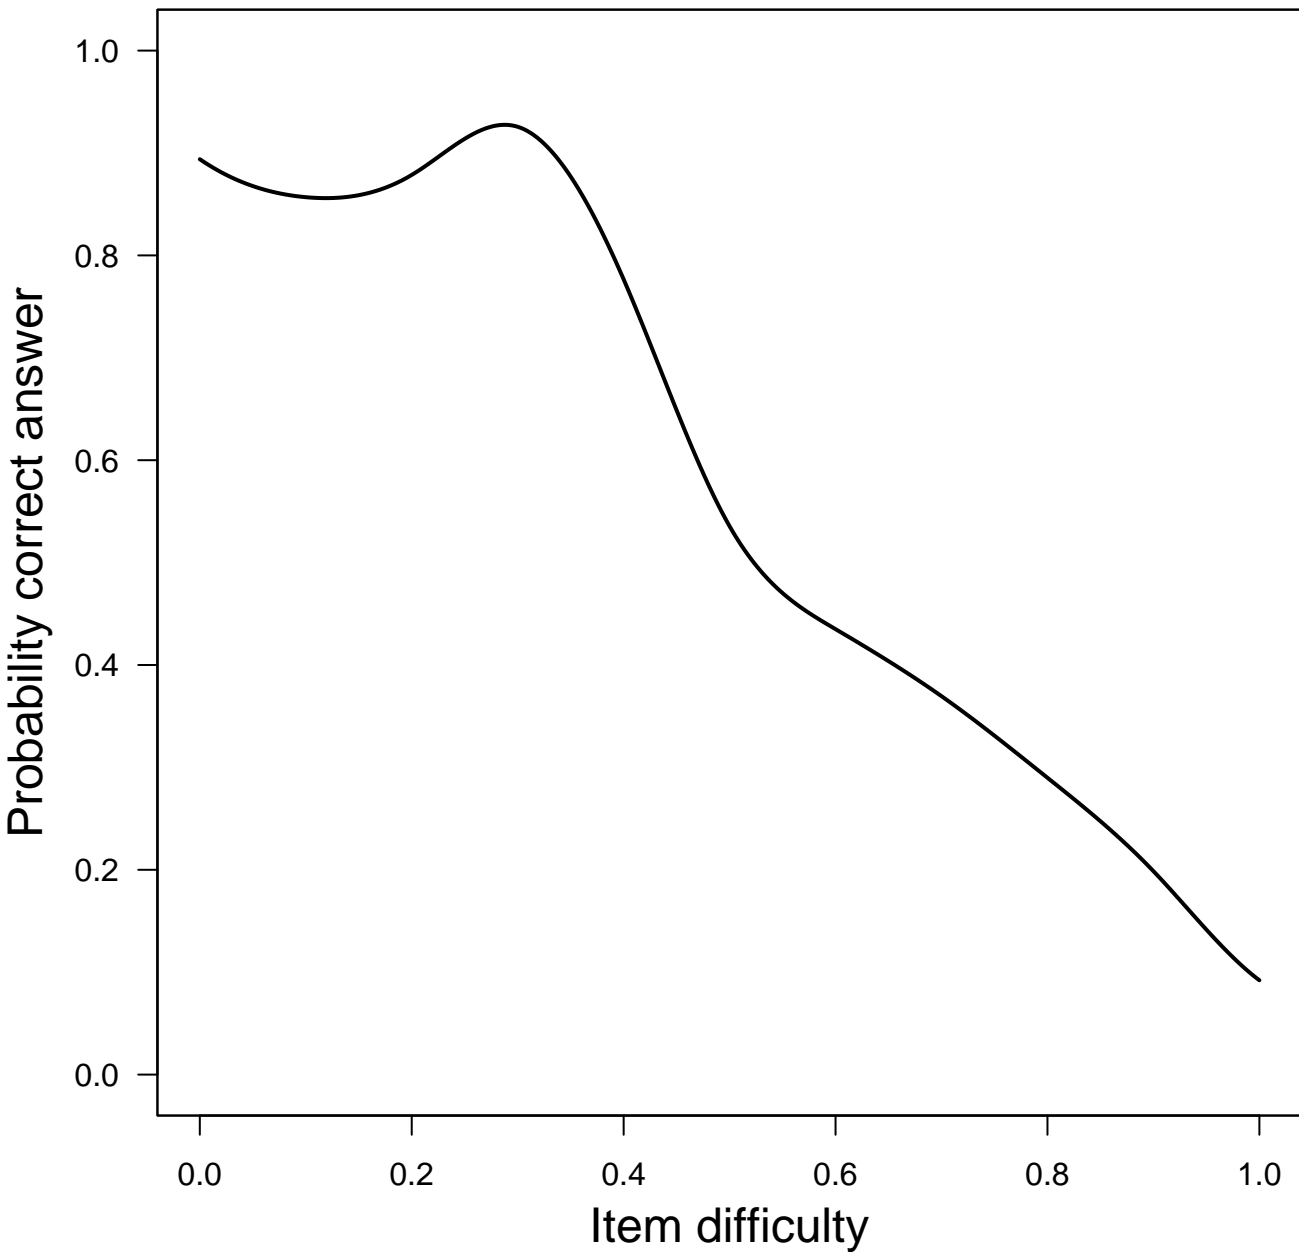



**PRF (resplD # 55)**

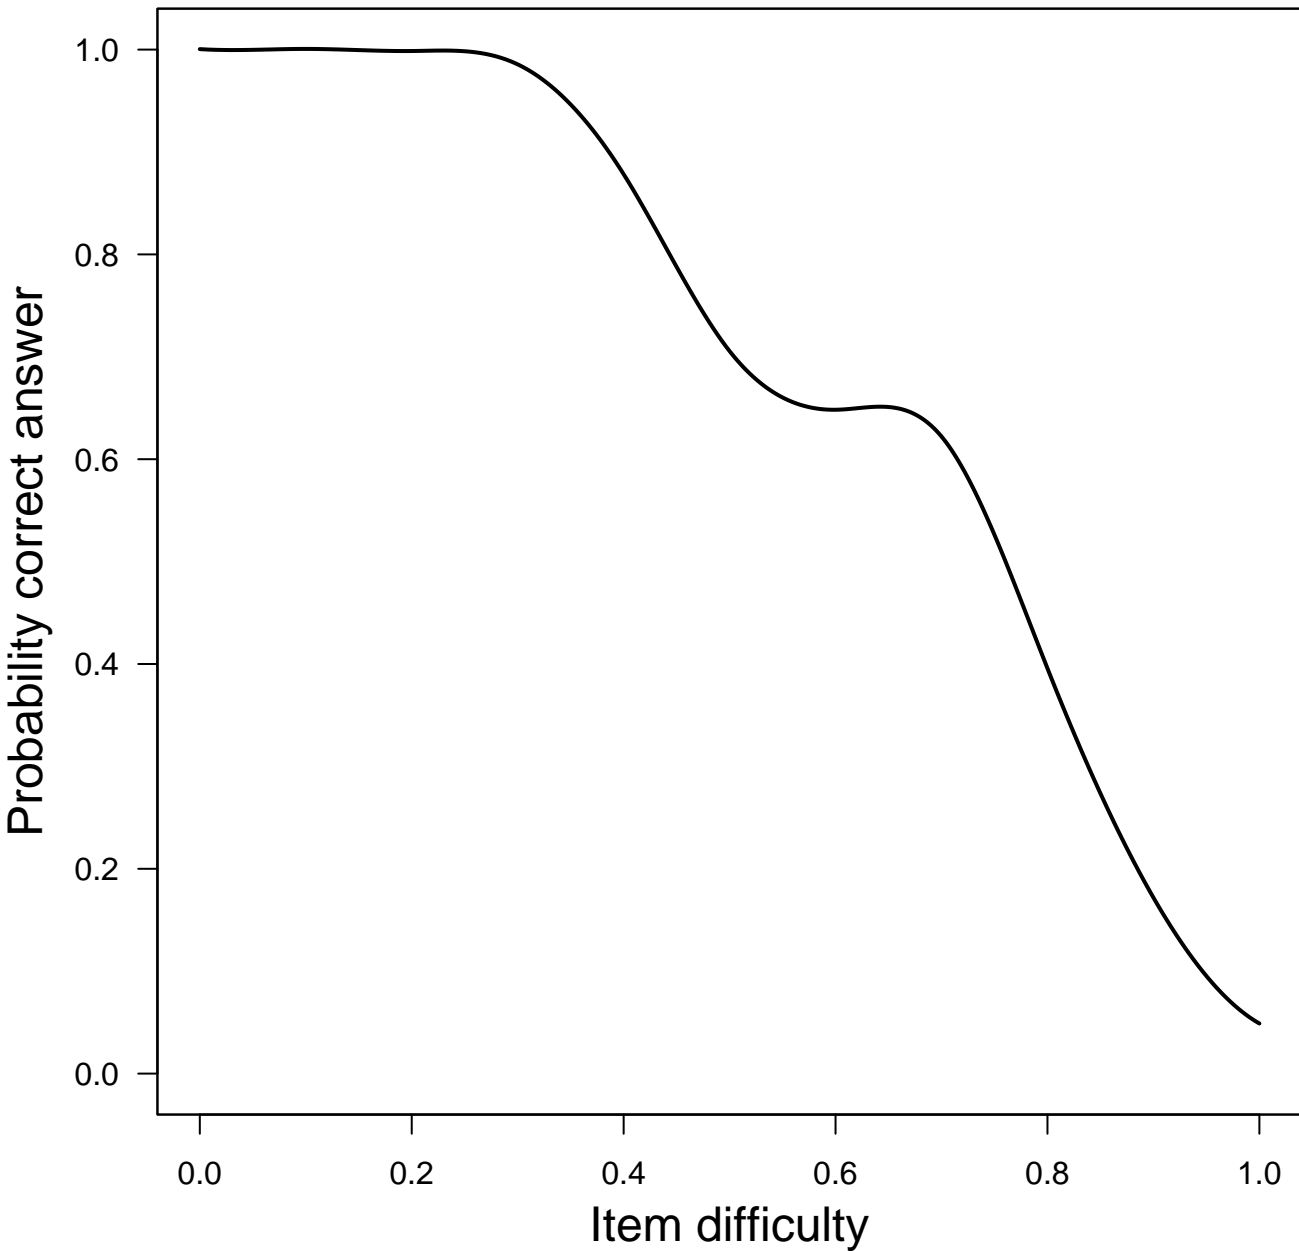

# PRF (respID # 58)

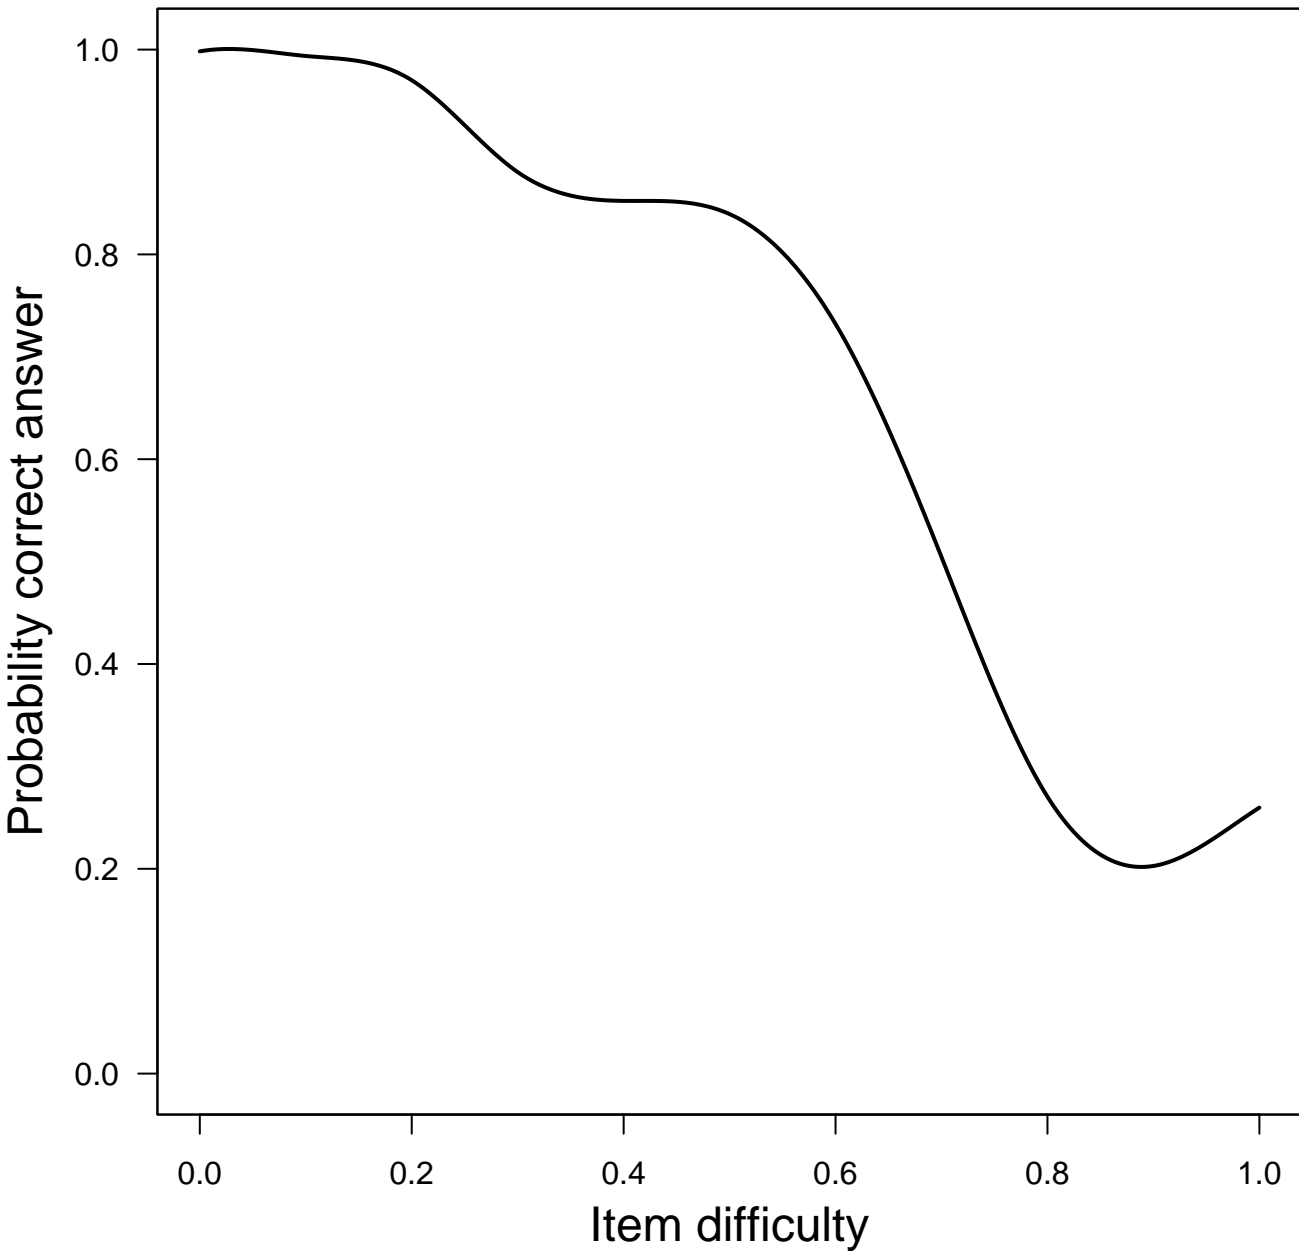

# PRF (respID # 59)

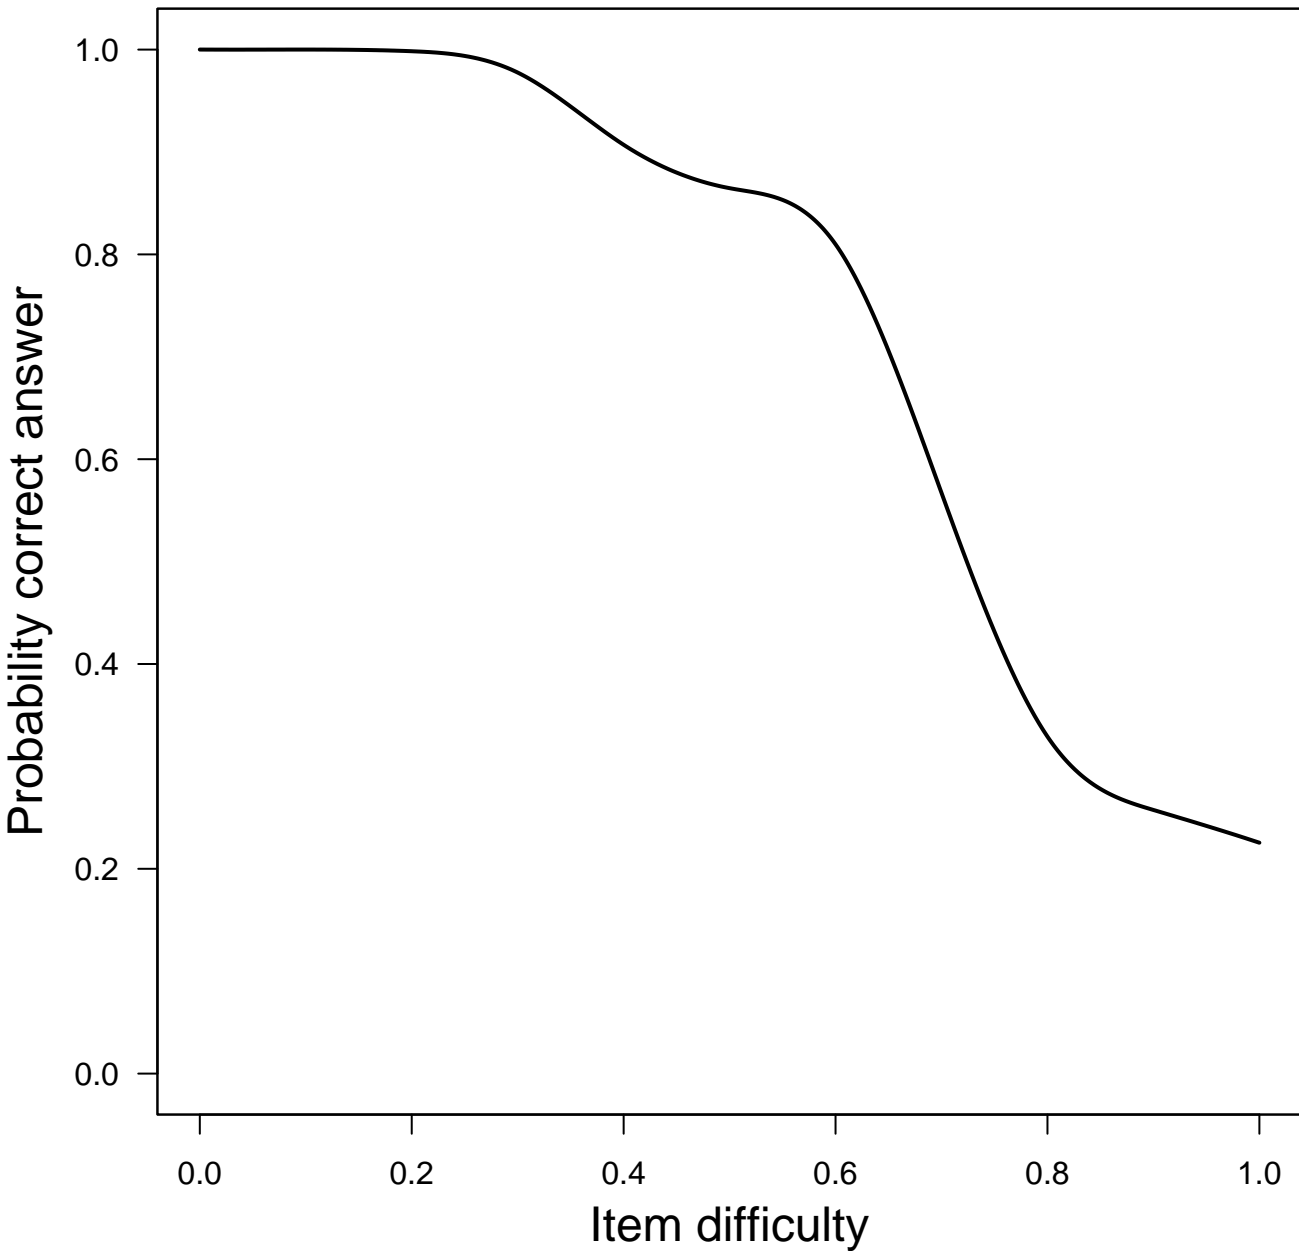

# PRF (respID # 60)

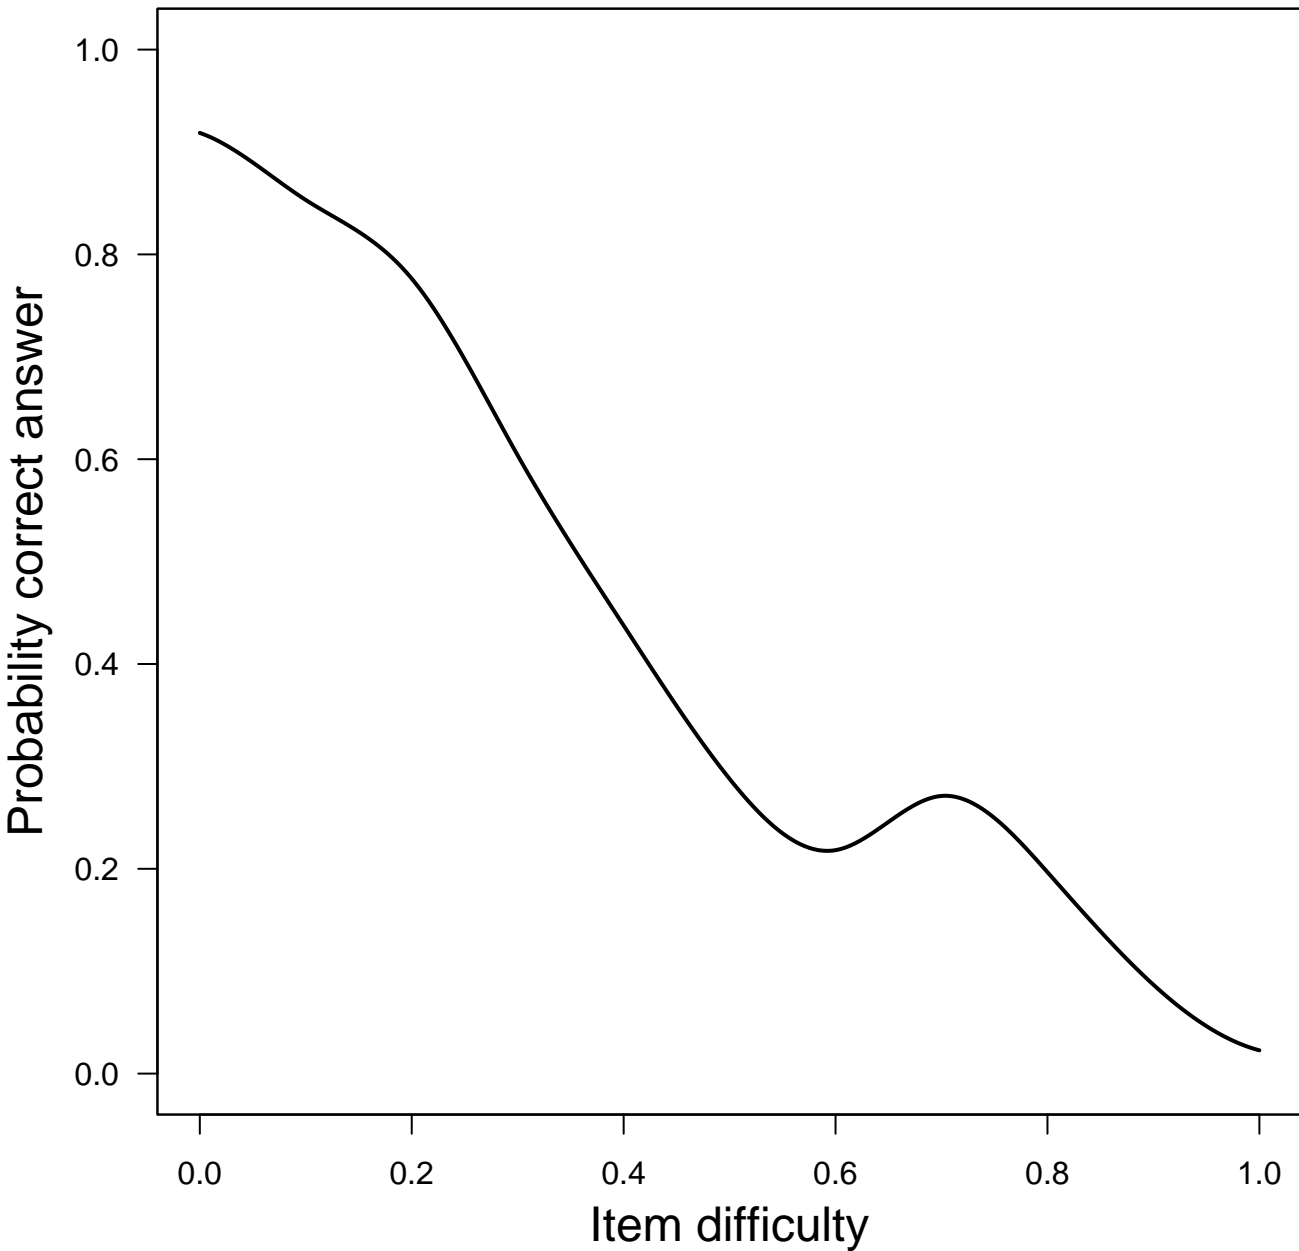

# PRF (resplD # 65)

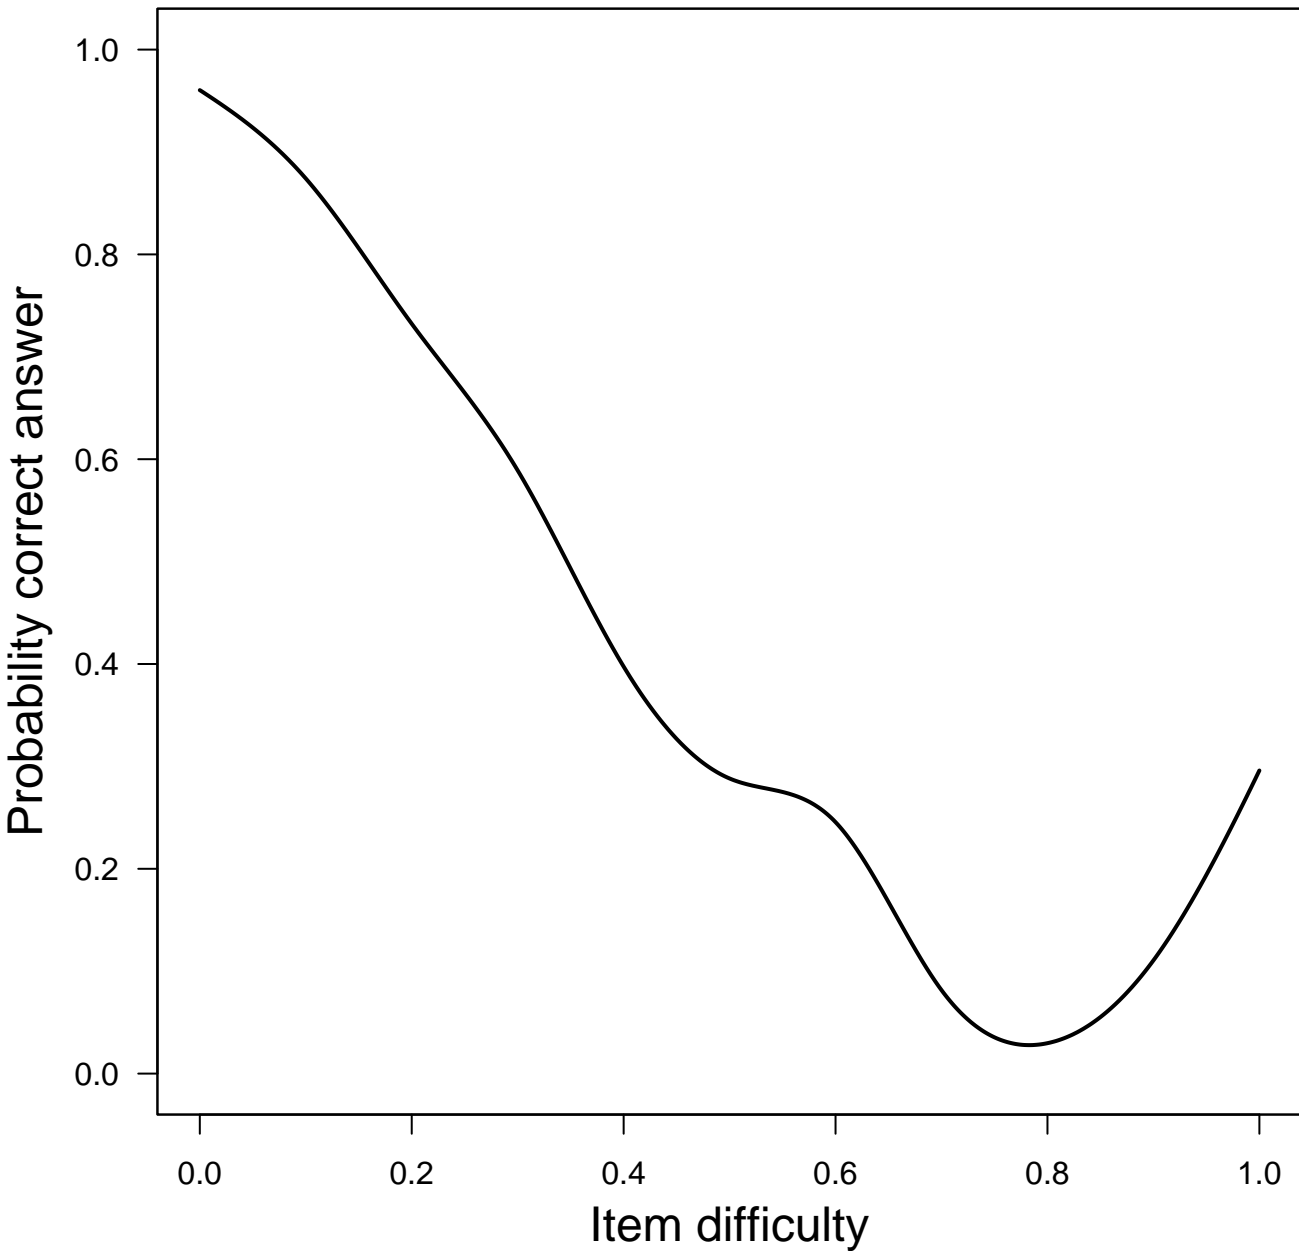

Supplement: supplementary_material [file attachment]
