# Supplementary material
Source: ML conference proceedings conference paper supplement (https://openreview.net/forum?id=Cth1PyCwZt)
Supplement: supplementary_material [file attachment]

2023 Languages and Codes

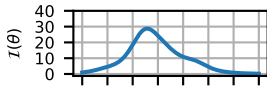

2023 Humanities

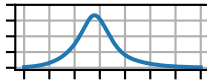

2023 Natural Sciences

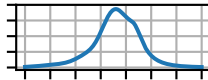

2023 Mathematics

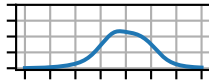

Mistral-7B Instruct

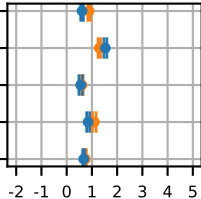

LLaMA3-8B Instruct

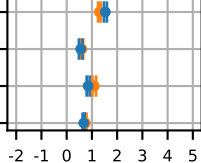

LLaMA2-7B Instruct

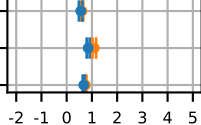

LLaMA2-13B Instruct

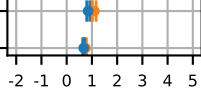

Gemma-7B Instruct

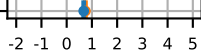IRT score ( $\theta$ )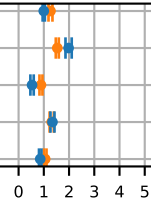IRT score ( $\theta$ )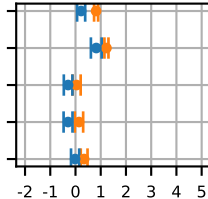IRT score ( $\theta$ )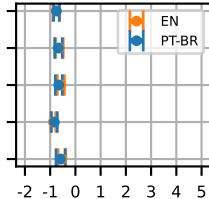IRT score ( $\theta$ )EN  
PT-BR
