# Supplementary material
Source: ML conference proceedings conference paper supplement (https://openreview.net/forum?id=Cth1PyCwZt)
Supplement: supplementary_material [file attachment]

2023 Mathematics (PT-BR)

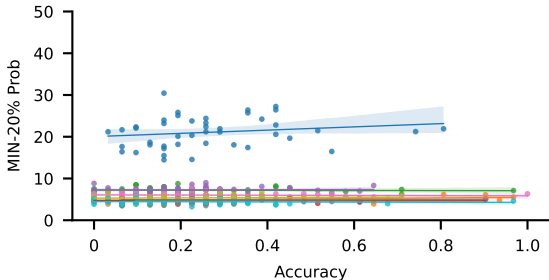

Model: Pearson r (p-value)

- Gemma-7B Instruct: 0.18 (0.24)
- Gemma-7B: 0.28 (0.06)
- LLaMA2-13B Instruct: -0.04 (0.79)
- LLaMA2-13B: -0.02 (0.90)
- LLaMA2-7B Instruct: 0.02 (0.87)
- LLaMA2-7B: -0.01 (0.96)
- LLaMA3-8B Instruct: -0.07 (0.67)
- LLaMA3-8B: 0.06 (0.71)
- Mistral-7B Instruct: 0.09 (0.56)
- Mistral-7B: -0.08 (0.60)
