# Supplementary material
Source: ML conference proceedings conference paper supplement (https://openreview.net/forum?id=Cth1PyCwZt)
Supplement: supplementary_material [file attachment]

2023 Humanities (EN)

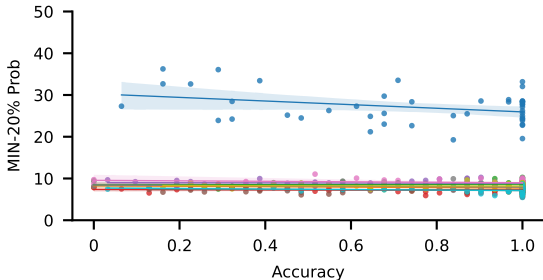

Model: Pearson r (p-value)

- Gemma-7B Instruct: -0.32 (0.03)
- Gemma-7B: -0.16 (0.30)
- LLaMA2-13B Instruct: 0.06 (0.69)
- LLaMA2-13B: -0.09 (0.56)
- LLaMA2-7B Instruct: -0.07 (0.66)
- LLaMA2-7B: -0.06 (0.72)
- LLaMA3-8B Instruct: -0.20 (0.20)
- LLaMA3-8B: -0.18 (0.23)
- Mistral-7B Instruct: -0.07 (0.65)
- Mistral-7B: -0.20 (0.18)
