# Supplementary material
Source: ML conference proceedings conference paper supplement (https://openreview.net/forum?id=Cth1PyCwZt)
Supplement: supplementary_material [file attachment]

2023 Natural Sciences (EN)

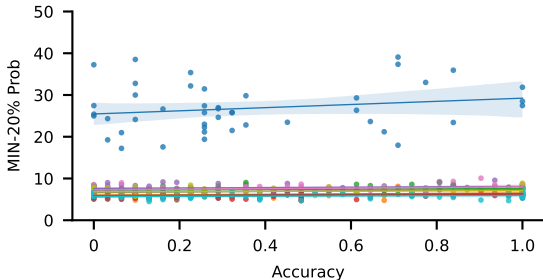

Model: Pearson r (p-value)

- Gemma-7B Instruct: 0.20 (0.19)
- Gemma-7B: 0.24 (0.11)
- LLaMA2-13B Instruct: 0.16 (0.31)
- LLaMA2-13B: 0.31 (0.04)
- LLaMA2-7B Instruct: 0.21 (0.17)
- LLaMA2-7B: 0.21 (0.17)
- LLaMA3-8B Instruct: 0.30 (0.05)
- LLaMA3-8B: 0.28 (0.06)
- Mistral-7B Instruct: 0.15 (0.34)
- Mistral-7B: 0.14 (0.35)
