# Supplementary material
Source: ML conference proceedings conference paper supplement (https://openreview.net/forum?id=Cth1PyCwZt)
Supplement: supplementary_material [file attachment]

2023 Mathematics (EN)

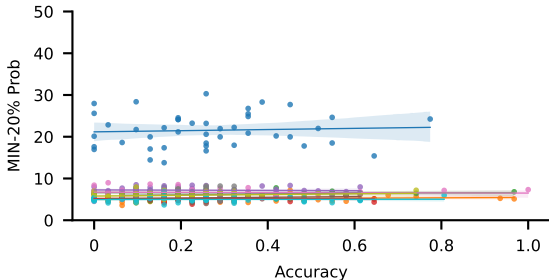

Model: Pearson r (p-value)

- Gemma-7B Instruct: 0.06 (0.68)
- Gemma-7B: 0.16 (0.32)
- LLaMA2-13B Instruct: -0.02 (0.87)
- LLaMA2-13B: -0.04 (0.82)
- LLaMA2-7B Instruct: -0.07 (0.66)
- LLaMA2-7B: 0.17 (0.28)
- LLaMA3-8B Instruct: -0.05 (0.75)
- LLaMA3-8B: 0.15 (0.35)
- Mistral-7B Instruct: 0.19 (0.21)
- Mistral-7B: 0.03 (0.85)
