# Supplementary material
Source: ML conference proceedings conference paper supplement (https://openreview.net/forum?id=Cth1PyCwZt)
Supplement: supplementary_material [file attachment]

2022 Languages and Codes

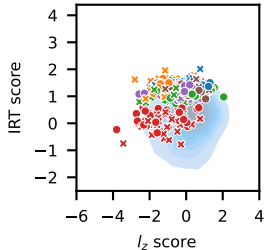

2022 Humanities

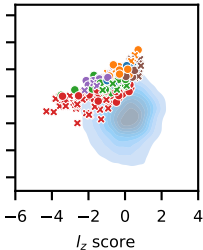

2022 Natural Sciences

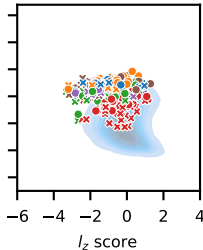

2022 Mathematics

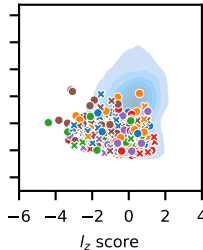

MODEL

● ChatGPT-3.5

● Gemma-7B

● LLaMA2-13B

● LLaMA2-7B

● LLaMA3-8B

● Mistral-7B

LANGUAGE

● EN

× PT-BR
