# Supplementary material
Source: ML conference proceedings conference paper supplement (https://openreview.net/forum?id=Cth1PyCwZt)
Supplement: supplementary_material [file attachment]

2023 Humanities (PT-BR)

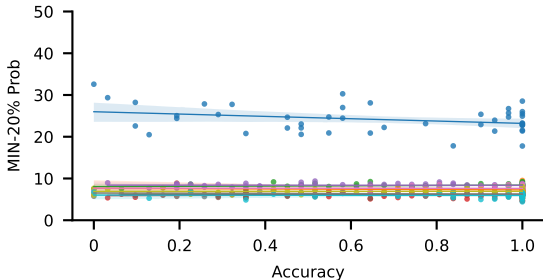

Model: Pearson r (p-value)

- Gemma-7B Instruct: -0.30 (0.05)
- Gemma-7B: -0.09 (0.55)
- LLaMA2-13B Instruct: 0.18 (0.25)
- LLaMA2-13B: 0.09 (0.58)
- LLaMA2-7B Instruct: -0.02 (0.92)
- LLaMA2-7B: -0.00 (1.00)
- LLaMA3-8B Instruct: -0.02 (0.90)
- LLaMA3-8B: -0.11 (0.46)
- Mistral-7B Instruct: 0.01 (0.96)
- Mistral-7B: -0.04 (0.77)
