# Supplementary material
Source: ML conference proceedings conference paper supplement (https://openreview.net/forum?id=Cth1PyCwZt)
Supplement: supplementary_material [file attachment]

2023 Languages and Codes

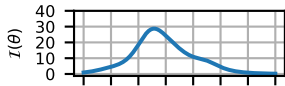

2023 Humanities

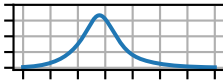

2023 Natural Sciences

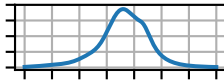

2023 Mathematics

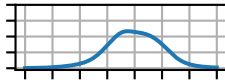

Mistral-7B

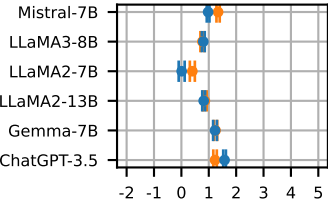

LLaMA3-8B

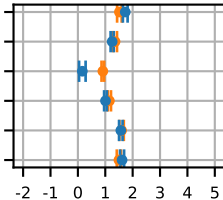

LLaMA2-7B

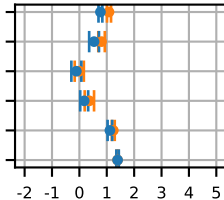

LLaMA2-13B

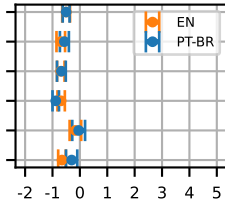

Gemma-7B

EN  
PT-BR

ChatGPT-3.5

IRT score ( $\theta$ )IRT score ( $\theta$ )IRT score ( $\theta$ )IRT score ( $\theta$ )
