# Supplementary material
Source: ML conference proceedings conference paper supplement (https://openreview.net/forum?id=Cth1PyCwZt)
Supplement: supplementary_material [file attachment]

2022 Languages and Codes (EN)

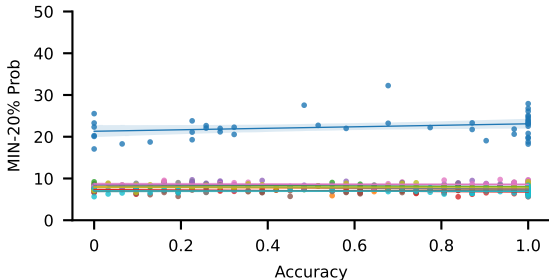

Model: Pearson r (p-value)

- Gemma-7B Instruct: 0.24 (0.11)
- Gemma-7B: -0.22 (0.15)
- LLaMA2-13B Instruct: -0.27 (0.07)
- LLaMA2-13B: -0.34 (0.02)
- LLaMA2-7B Instruct: 0.02 (0.89)
- LLaMA2-7B: 0.14 (0.35)
- LLaMA3-8B Instruct: -0.07 (0.65)
- LLaMA3-8B: -0.36 (0.02)
- Mistral-7B Instruct: -0.00 (1.00)
- Mistral-7B: -0.05 (0.76)
