# Supplementary material
Source: ML conference proceedings conference paper supplement (https://openreview.net/forum?id=Cth1PyCwZt)
Supplement: supplementary_material [file attachment]

2022 Mathematics (PT-BR)

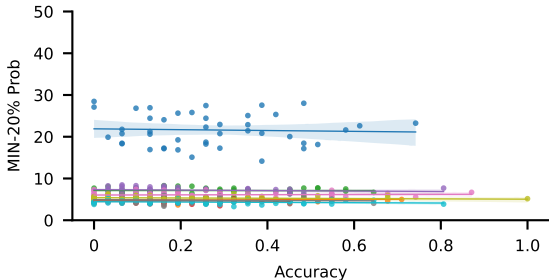

Model: Pearson r (p-value)

- Gemma-7B Instruct: -0.05 (0.76)
- Gemma-7B: 0.12 (0.42)
- LLaMA2-13B Instruct: -0.02 (0.91)
- LLaMA2-13B: 0.12 (0.44)
- LLaMA2-7B Instruct: -0.15 (0.34)
- LLaMA2-7B: -0.17 (0.26)
- LLaMA3-8B Instruct: 0.07 (0.66)
- LLaMA3-8B: -0.08 (0.59)
- Mistral-7B Instruct: -0.14 (0.35)
- Mistral-7B: -0.18 (0.23)
