# Supplementary material
Source: ML conference proceedings conference paper supplement (https://openreview.net/forum?id=Cth1PyCwZt)
Supplement: supplementary_material [file attachment]

2023 Languages and Codes

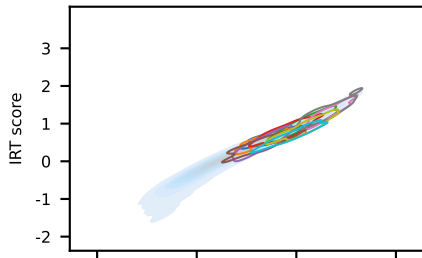

2023 Humanities

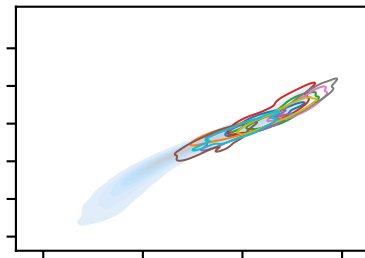

2023 Natural Sciences

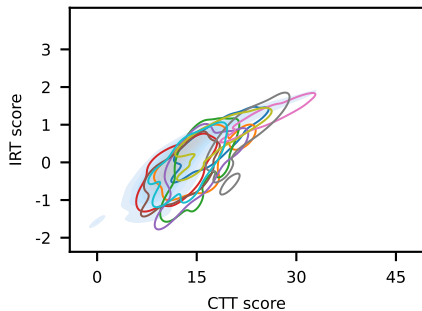

2023 Mathematics

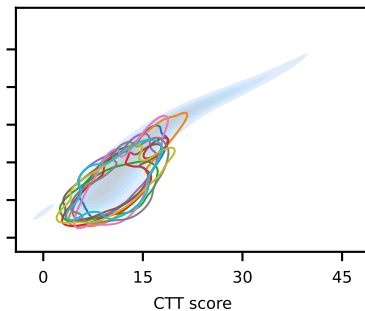

- Gemma-7B Instruct (EN)
- Gemma-7B Instruct (PT-BR)
- LLaMA2-13B Instruct (EN)
- LLaMA2-13B Instruct (PT-BR)
- LLaMA2-7B Instruct (EN)
- LLaMA2-7B Instruct (PT-BR)
- LLaMA3-8B Instruct (EN)
- LLaMA3-8B Instruct (PT-BR)
- Mistral-7B Instruct (EN)
- Mistral-7B Instruct (PT-BR)
