# Supplementary material
Source: ML conference proceedings conference paper supplement (https://openreview.net/forum?id=Cth1PyCwZt)
Supplement: supplementary_material [file attachment]

2022 Languages and Codes

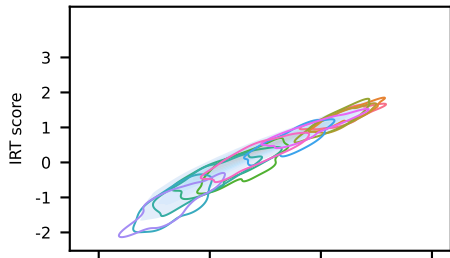

2022 Humanities

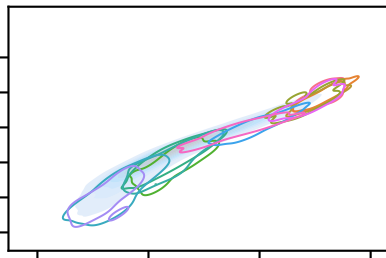

2022 Natural Sciences

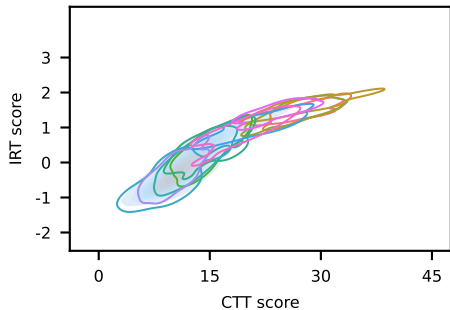

2022 Mathematics

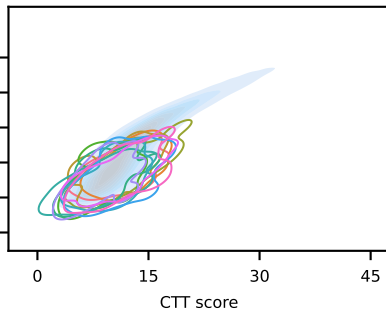

- ChatGPT-3.5 (EN)
- ChatGPT-3.5 (PT-BR)
- Gemma-7B (EN)
- Gemma-7B (PT-BR)
- LLaMA2-13B (EN)
- LLaMA2-13B (PT-BR)
- LLaMA2-7B (EN)
- LLaMA2-7B (PT-BR)
- LLaMA3-8B (EN)
- LLaMA3-8B (PT-BR)
- Mistral-7B (EN)
- Mistral-7B (PT-BR)
