# Supplementary material
Source: ML conference proceedings conference paper supplement (https://openreview.net/forum?id=Cth1PyCwZt)
Supplement: supplementary_material [file attachment]

2023 Natural Sciences (PT-BR)

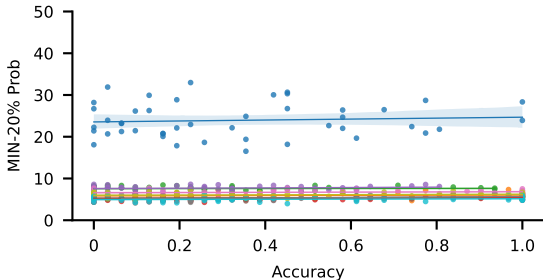

Model: Pearson r (p-value)

- Gemma-7B Instruct: 0.08 (0.61)
- Gemma-7B: 0.13 (0.41)
- LLaMA2-13B Instruct: 0.04 (0.82)
- LLaMA2-13B: 0.25 (0.10)
- LLaMA2-7B Instruct: 0.17 (0.26)
- LLaMA2-7B: 0.11 (0.49)
- LLaMA3-8B Instruct: 0.14 (0.37)
- LLaMA3-8B: 0.36 (0.01)
- Mistral-7B Instruct: 0.14 (0.35)
- Mistral-7B: 0.15 (0.32)
