# Supplementary material
Source: ML conference proceedings conference paper supplement (https://openreview.net/forum?id=Cth1PyCwZt)
Supplement: supplementary_material [file attachment]

2022 Natural Sciences (EN)

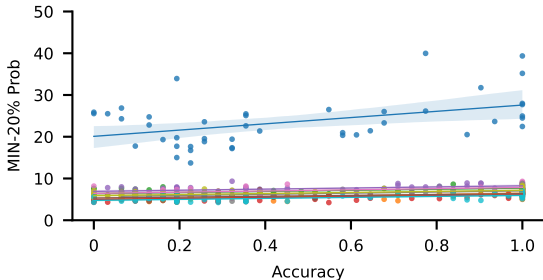

Model: Pearson r (p-value)

- Gemma-7B Instruct: 0.44 (0.00)
- Gemma-7B: 0.65 (0.00)
- LLaMA2-13B Instruct: 0.56 (0.00)
- LLaMA2-13B: 0.58 (0.00)
- LLaMA2-7B Instruct: 0.52 (0.00)
- LLaMA2-7B: 0.45 (0.00)
- LLaMA3-8B Instruct: 0.57 (0.00)
- LLaMA3-8B: 0.58 (0.00)
- Mistral-7B Instruct: 0.59 (0.00)
- Mistral-7B: 0.62 (0.00)
