# Supplementary material
Source: ML conference proceedings conference paper supplement (https://openreview.net/forum?id=Cth1PyCwZt)
Supplement: supplementary_material [file attachment]

2022 Mathematics (EN)

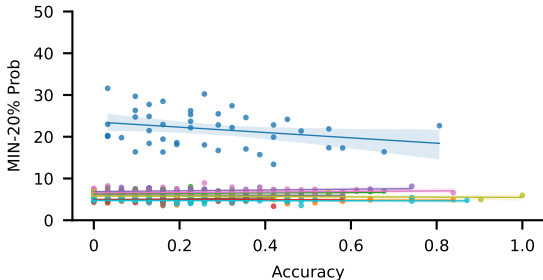

Model: Pearson r (p-value)

- Gemma-7B Instruct: -0.27 (0.07)
- Gemma-7B: -0.03 (0.86)
- LLaMA2-13B Instruct: 0.11 (0.48)
- LLaMA2-13B: -0.04 (0.81)
- LLaMA2-7B Instruct: 0.27 (0.07)
- LLaMA2-7B: 0.23 (0.13)
- LLaMA3-8B Instruct: 0.14 (0.36)
- LLaMA3-8B: -0.05 (0.75)
- Mistral-7B Instruct: -0.13 (0.42)
- Mistral-7B: -0.04 (0.80)
