# Supplementary material
Source: ML conference proceedings conference paper supplement (https://openreview.net/forum?id=Cth1PyCwZt)
Supplement: supplementary_material [file attachment]

2022 Humanities (EN)

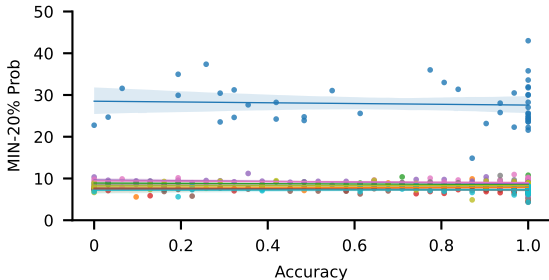

Model: Pearson r (p-value)

- Gemma-7B Instruct: -0.06 (0.69)
- Gemma-7B: 0.06 (0.70)
- LLaMA2-13B Instruct: -0.16 (0.30)
- LLaMA2-13B: -0.06 (0.68)
- LLaMA2-7B Instruct: -0.36 (0.02)
- LLaMA2-7B: -0.14 (0.36)
- LLaMA3-8B Instruct: -0.15 (0.32)
- LLaMA3-8B: -0.08 (0.62)
- Mistral-7B Instruct: 0.04 (0.78)
- Mistral-7B: 0.02 (0.87)
