# Supplementary material
Source: ML conference proceedings conference paper supplement (https://openreview.net/forum?id=Cth1PyCwZt)
Supplement: supplementary_material [file attachment]

2022 Languages and Codes

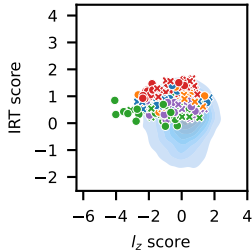

2022 Humanities

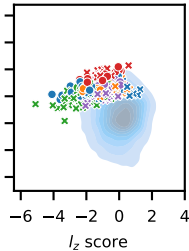

2022 Natural Sciences

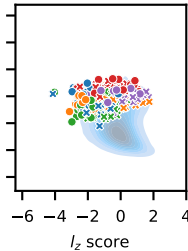

2022 Mathematics

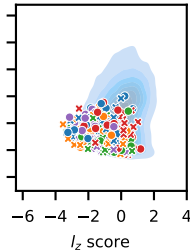

MODEL

- Gemma-7B Instruct
- LLaMA2-13B Instruct
- LLaMA2-7B Instruct
- LLaMA3-8B Instruct
- Mistral-7B Instruct

LANGUAGE

- EN
- PT-BR
