# Supplementary material
Source: ML conference proceedings conference paper supplement (https://openreview.net/forum?id=Cth1PyCwZt)
Supplement: supplementary_material [file attachment]

2022 Humanities (PT-BR)

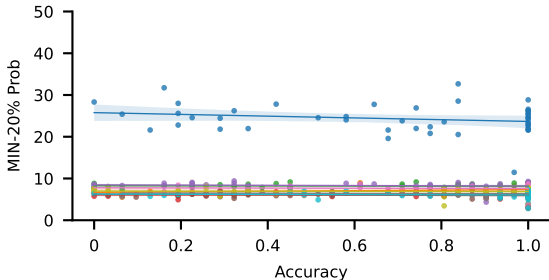

Model: Pearson r (p-value)

- Gemma-7B Instruct: -0.20 (0.18)
- Gemma-7B: 0.18 (0.24)
- LLaMA2-13B Instruct: -0.05 (0.73)
- LLaMA2-13B: -0.06 (0.70)
- LLaMA2-7B Instruct: -0.12 (0.43)
- LLaMA2-7B: -0.09 (0.56)
- LLaMA3-8B Instruct: -0.07 (0.65)
- LLaMA3-8B: -0.05 (0.74)
- Mistral-7B Instruct: -0.06 (0.69)
- Mistral-7B: -0.09 (0.56)
