# Supplementary material
Source: ML conference proceedings conference paper supplement (https://openreview.net/forum?id=Cth1PyCwZt)
Supplement: supplementary_material [file attachment]

2023 Languages and Codes (EN)

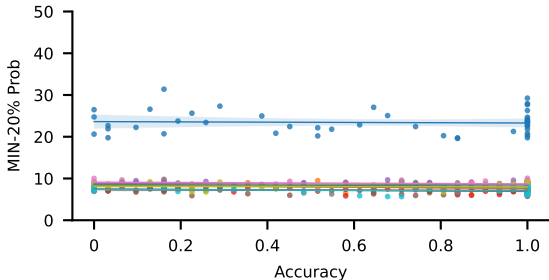

Model: Pearson r (p-value)

- Gemma-7B Instruct: -0.05 (0.76)
- Gemma-7B: -0.32 (0.03)
- LLaMA2-13B Instruct: -0.24 (0.12)
- LLaMA2-13B: -0.31 (0.04)
- LLaMA2-7B Instruct: -0.22 (0.15)
- LLaMA2-7B: -0.06 (0.67)
- LLaMA3-8B Instruct: -0.21 (0.17)
- LLaMA3-8B: -0.30 (0.04)
- Mistral-7B Instruct: -0.08 (0.61)
- Mistral-7B: -0.18 (0.23)
