# Supplementary material
Source: ML conference proceedings conference paper supplement (https://openreview.net/forum?id=Cth1PyCwZt)
Supplement: supplementary_material [file attachment]

2022 Natural Sciences (PT-BR)

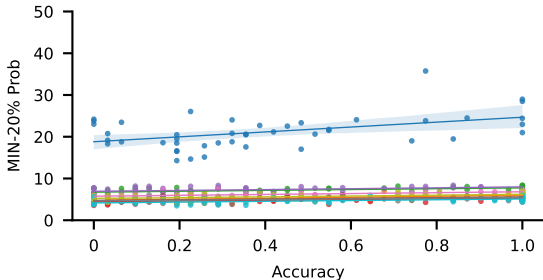

Model: Pearson r (p-value)

- Gemma-7B Instruct: 0.46 (0.00)
- Gemma-7B: 0.58 (0.00)
- LLaMA2-13B Instruct: 0.48 (0.00)
- LLaMA2-13B: 0.49 (0.00)
- LLaMA2-7B Instruct: 0.42 (0.00)
- LLaMA2-7B: 0.41 (0.01)
- LLaMA3-8B Instruct: 0.57 (0.00)
- LLaMA3-8B: 0.52 (0.00)
- Mistral-7B Instruct: 0.52 (0.00)
- Mistral-7B: 0.53 (0.00)
