# Supplementary material
Source: ML conference proceedings conference paper supplement (https://openreview.net/forum?id=Cth1PyCwZt)
Supplement: supplementary_material [file attachment]

2023 Languages and Codes (PT-BR)

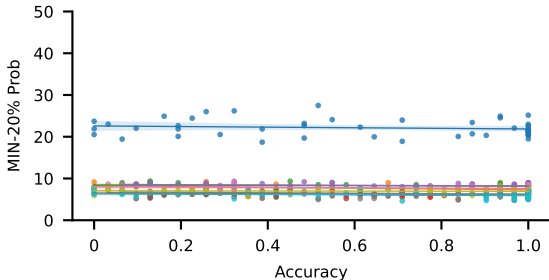

Model: Pearson r (p-value)

- Gemma-7B Instruct: -0.13 (0.40)
- Gemma-7B: -0.36 (0.02)
- LLaMA2-13B Instruct: -0.17 (0.26)
- LLaMA2-13B: -0.27 (0.07)
- LLaMA2-7B Instruct: -0.23 (0.13)
- LLaMA2-7B: -0.21 (0.16)
- LLaMA3-8B Instruct: -0.20 (0.18)
- LLaMA3-8B: -0.24 (0.11)
- Mistral-7B Instruct: -0.10 (0.53)
- Mistral-7B: -0.18 (0.23)
