# Supplementary material
Source: ML conference proceedings conference paper supplement (https://openreview.net/forum?id=Cth1PyCwZt)
Supplement: supplementary_material [file attachment]

2022 Languages and Codes

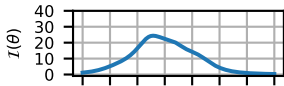

2022 Humanities

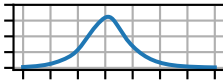

2022 Natural Sciences

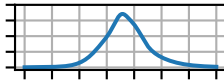

2022 Mathematics

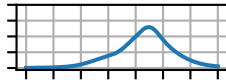

Mistral-7B

LLaMA3-8B

LLaMA2-7B

LLaMA2-13B

Gemma-7B

ChatGPT-3.5

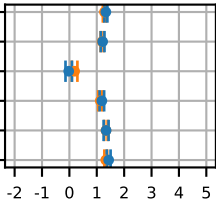IRT score ( $\theta$ )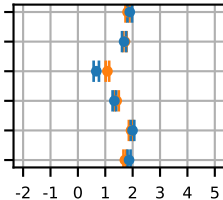IRT score ( $\theta$ )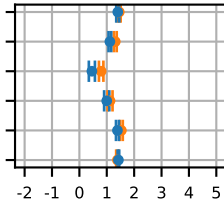IRT score ( $\theta$ )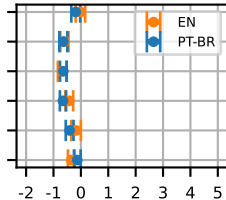IRT score ( $\theta$ )EN  
PT-BR
