# Supplementary material
Source: ML conference proceedings conference paper supplement (https://openreview.net/forum?id=Cth1PyCwZt)
Supplement: supplementary_material [file attachment]

2022 Languages and Codes (PT-BR)

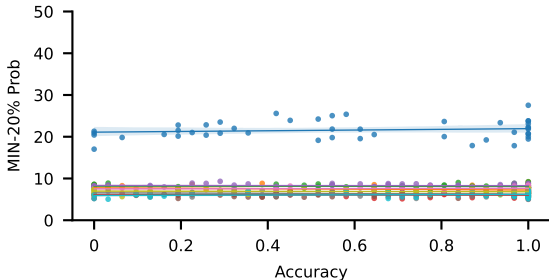

Model: Pearson r (p-value)

- Gemma-7B Instruct: 0.14 (0.37)
- Gemma-7B: -0.21 (0.16)
- LLaMA2-13B Instruct: -0.05 (0.73)
- LLaMA2-13B: -0.06 (0.67)
- LLaMA2-7B Instruct: -0.02 (0.88)
- LLaMA2-7B: 0.10 (0.53)
- LLaMA3-8B Instruct: 0.08 (0.61)
- LLaMA3-8B: -0.20 (0.20)
- Mistral-7B Instruct: -0.09 (0.56)
- Mistral-7B: 0.14 (0.35)
