# Supplementary material
Source: ML conference proceedings conference paper supplement (https://openreview.net/forum?id=Cth1PyCwZt)

2022 Languages and Codes

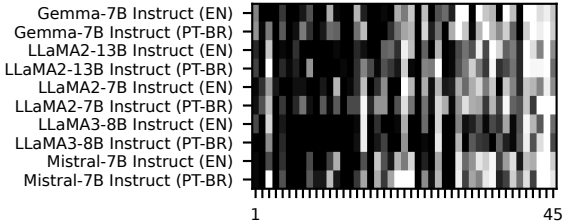

2022 Natural Sciences

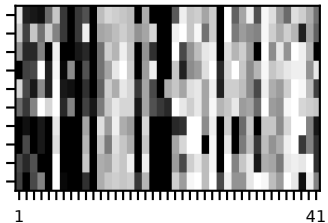

2022 Humanities

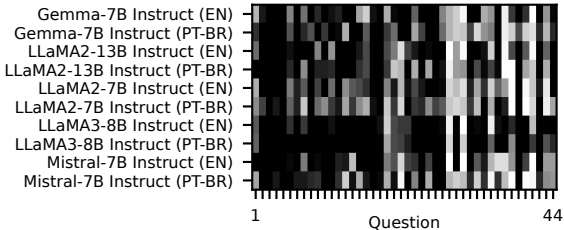

2022 Mathematics

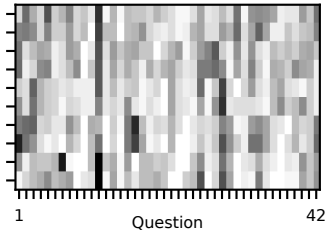

Supplement: supplementary_material [file attachment]

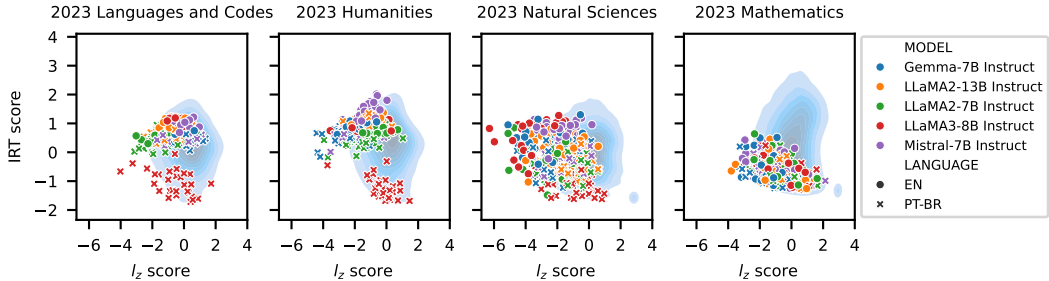

Supplement: supplementary_material [file attachment]

2022 Languages and Codes

2022 Natural Sciences

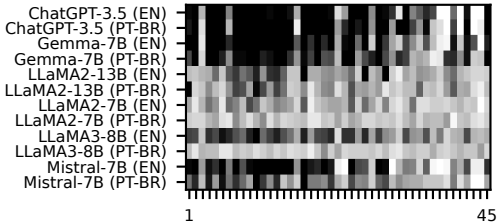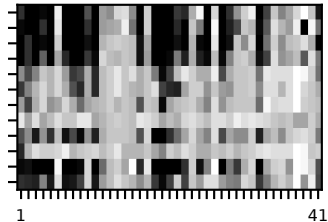

2022 Humanities

2022 Mathematics

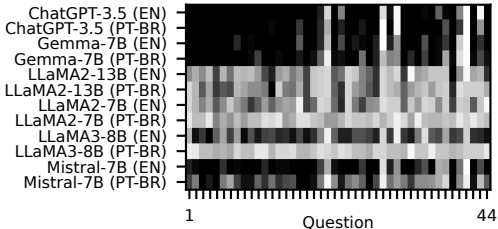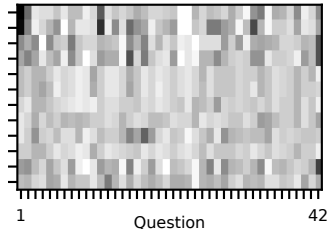

Supplement: supplementary_material [file attachment]

2022 Languages and Codes

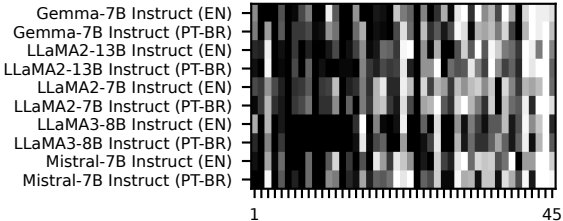

2022 Natural Sciences

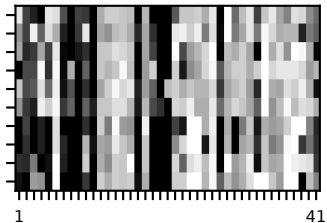

2022 Humanities

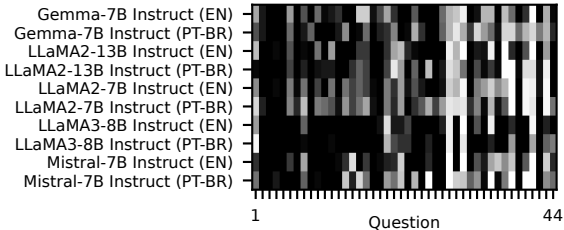

2022 Mathematics

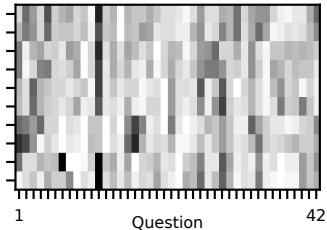

Supplement: supplementary_material [file attachment]

2022 Languages and Codes

2022 Natural Sciences

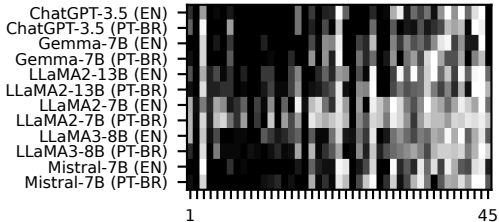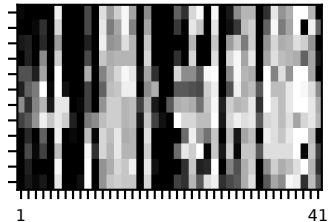

2022 Humanities

2022 Mathematics

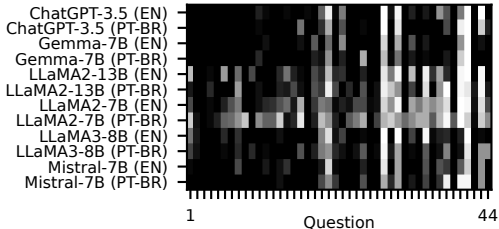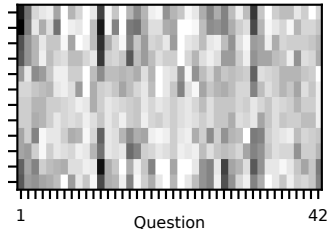

Supplement: supplementary_material [file attachment]

2023 Languages and Codes

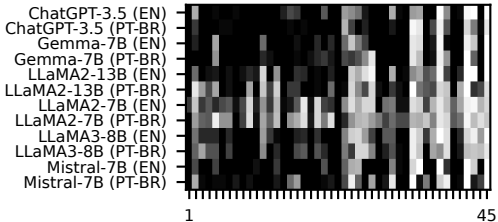

2023 Natural Sciences

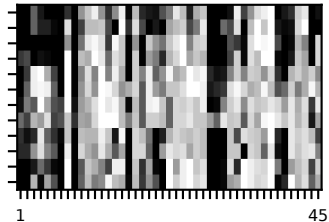

2023 Humanities

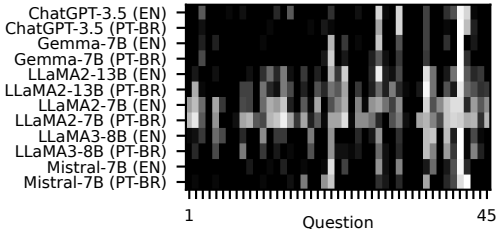

2023 Mathematics

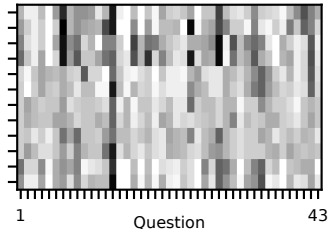

Supplement: supplementary_material [file attachment]

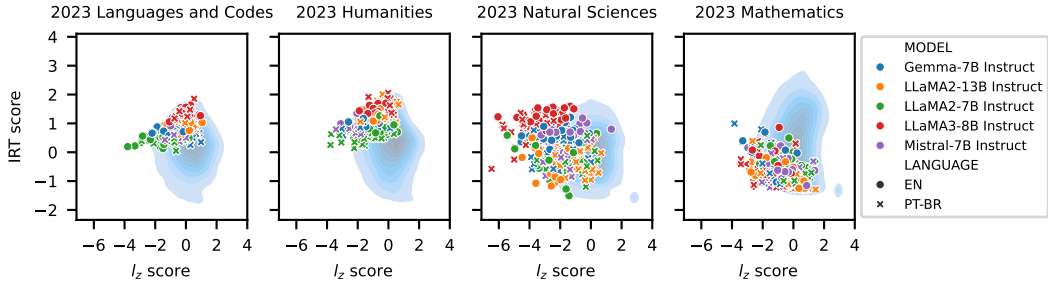

Supplement: supplementary_material [file attachment]

2023 Languages and Codes

2023 Natural Sciences

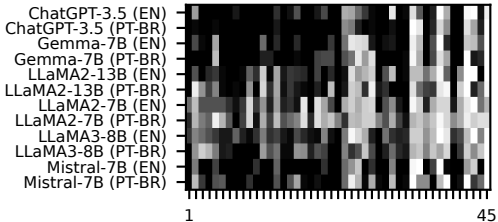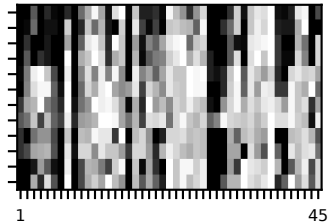

2023 Humanities

2023 Mathematics

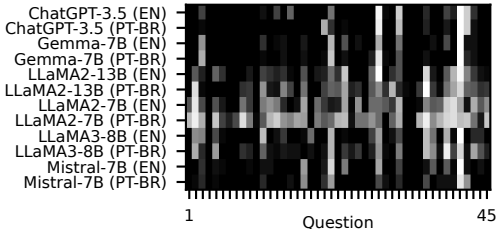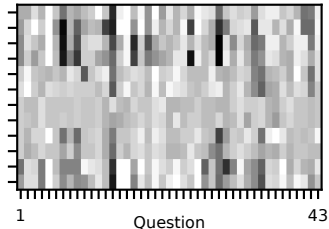

Supplement: supplementary_material [file attachment]

2023 Languages and Codes

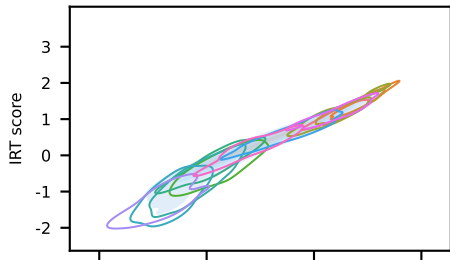

2023 Humanities

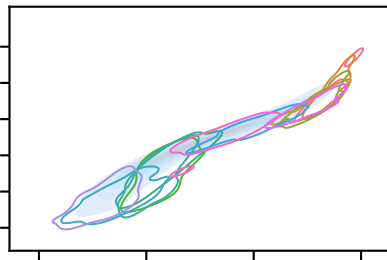

2023 Natural Sciences

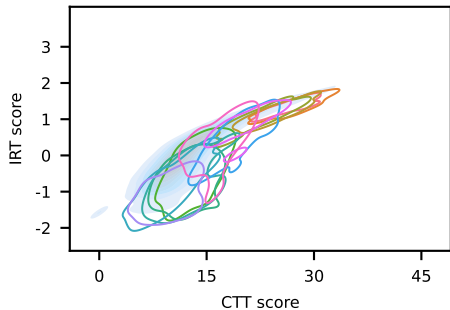

2023 Mathematics

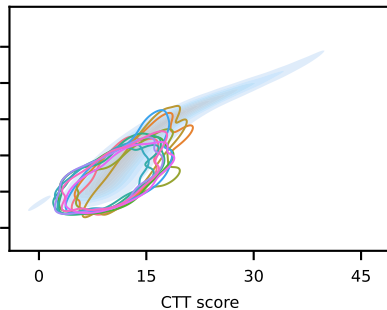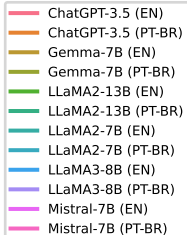

Supplement: supplementary_material [file attachment]

2022 Languages and Codes

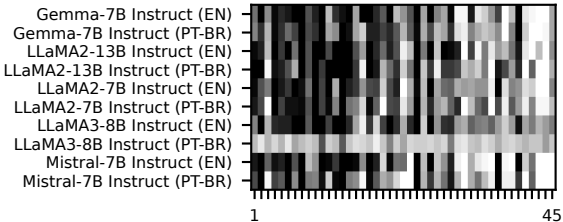

2022 Natural Sciences

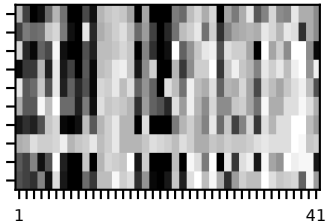

2022 Humanities

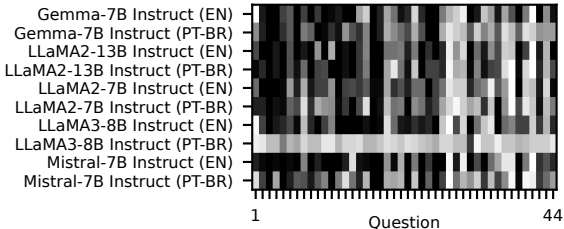

2022 Mathematics

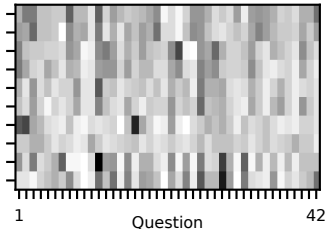

Supplement: supplementary_material [file attachment]

2023 Languages and Codes

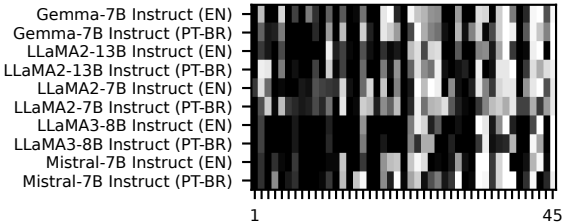

2023 Natural Sciences

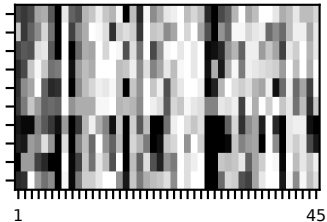

2023 Humanities

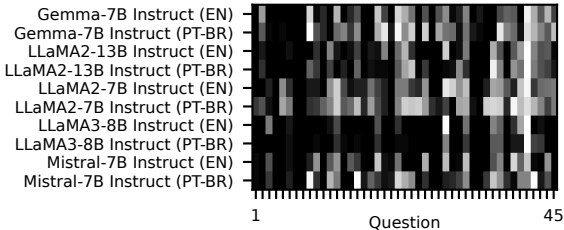

2023 Mathematics

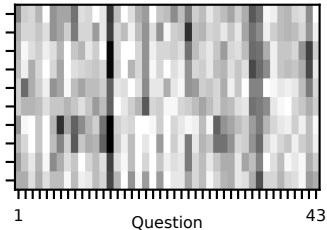

Supplement: supplementary_material [file attachment]

2023 Languages and Codes

2023 Natural Sciences

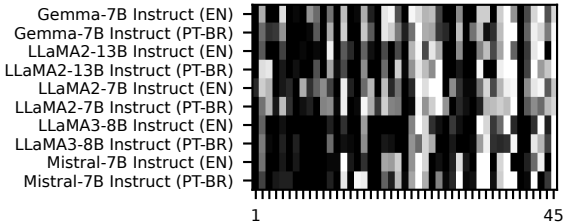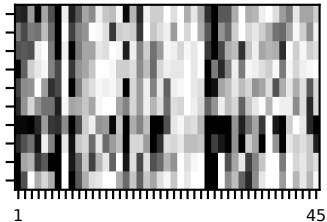

2023 Humanities

2023 Mathematics

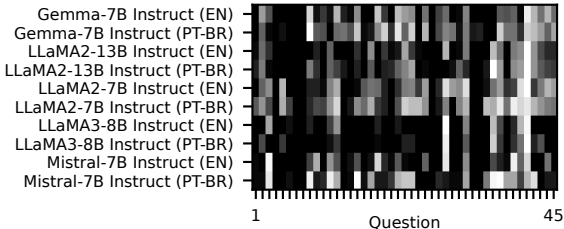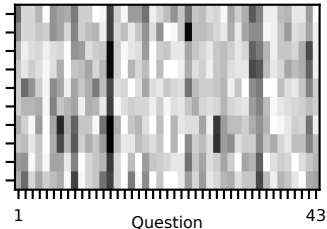

Supplement: supplementary_material [file attachment]

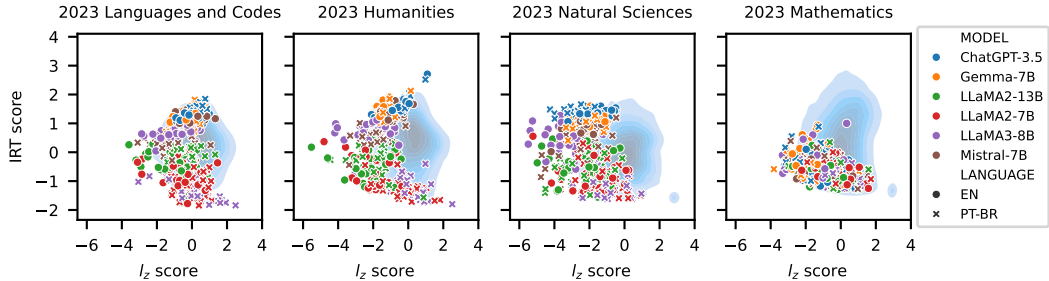

Supplement: supplementary_material [file attachment]

Humans (2023)

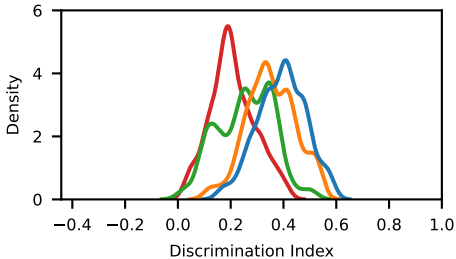

LLMs (2023)

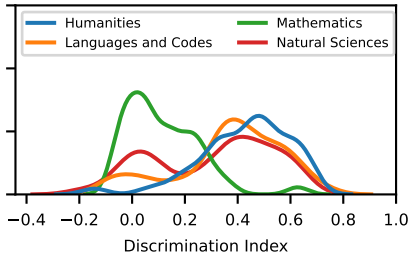

Supplement: supplementary_material [file attachment]

2023 Languages and Codes

2023 Natural Sciences

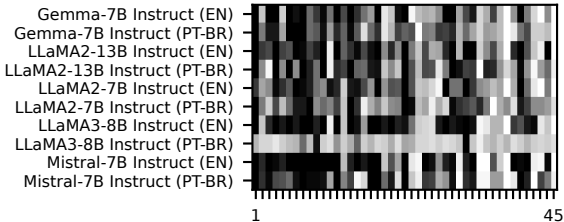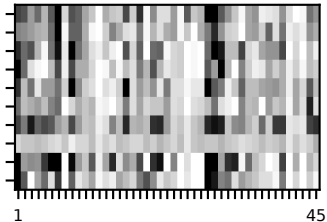

2023 Humanities

2023 Mathematics

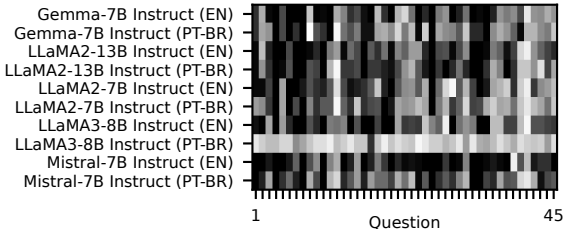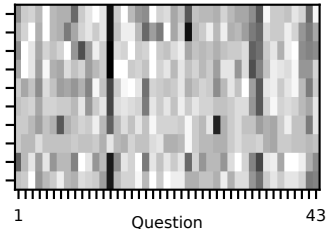

Supplement: supplementary_material [file attachment]

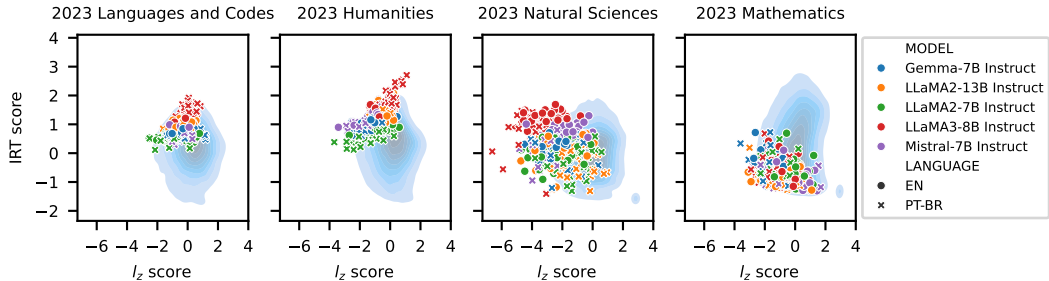

Supplement: supplementary_material [file attachment]

2022 Languages and Codes

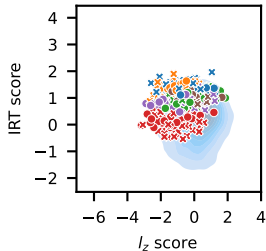

2022 Humanities

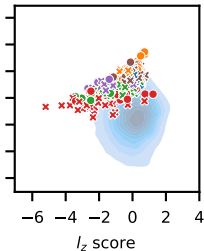

2022 Natural Sciences

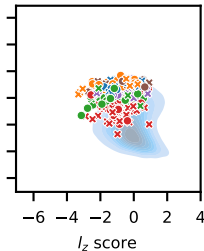

2022 Mathematics

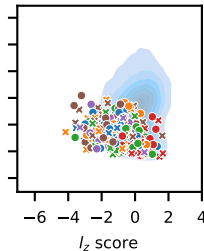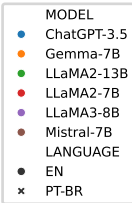

Supplement: supplementary_material [file attachment]

2022 Languages and Codes

2022 Natural Sciences

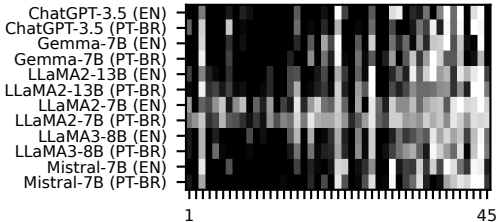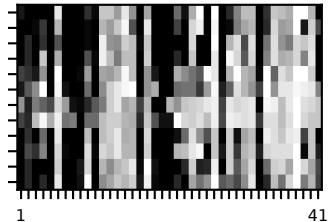

2022 Humanities

2022 Mathematics

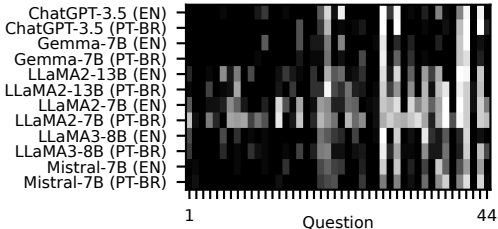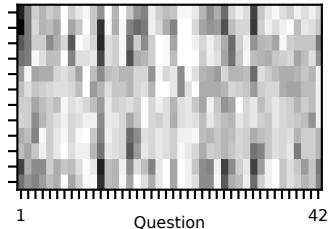

Supplement: supplementary_material [file attachment]

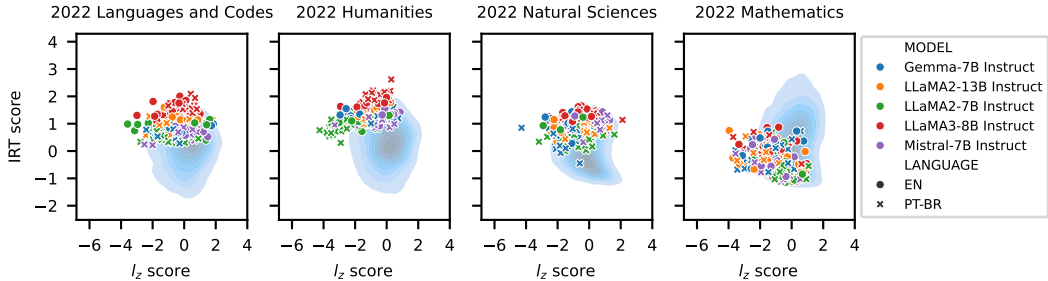

Supplement: supplementary_material [file attachment]

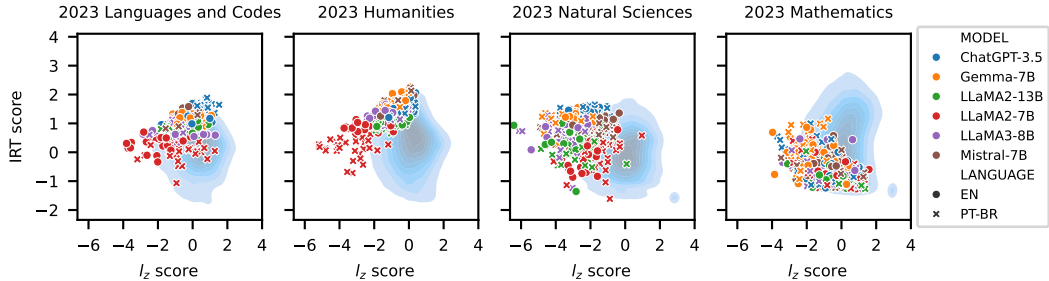

Supplement: supplementary_material [file attachment]

Humans (2022)

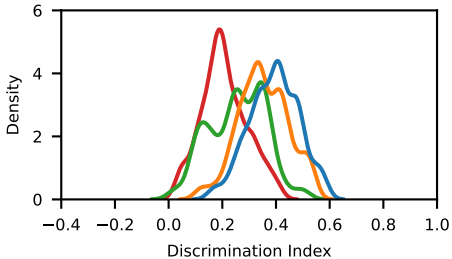

LLMs (2022)

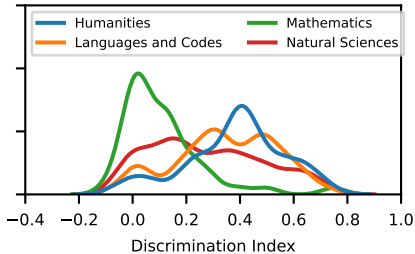

Supplement: supplementary_material [file attachment]

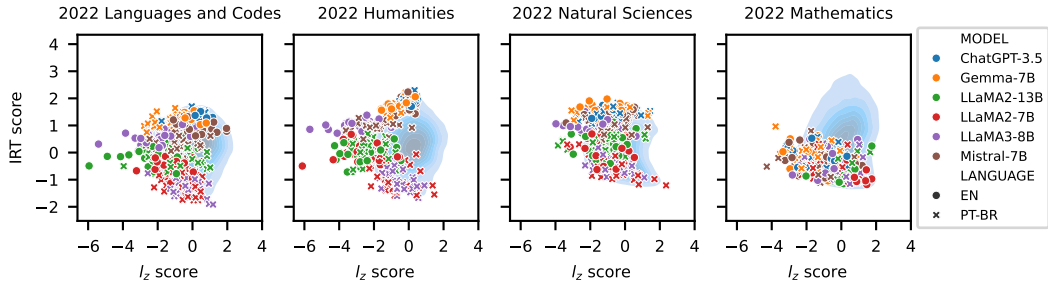

Supplement: supplementary_material [file attachment]

2023 Languages and Codes

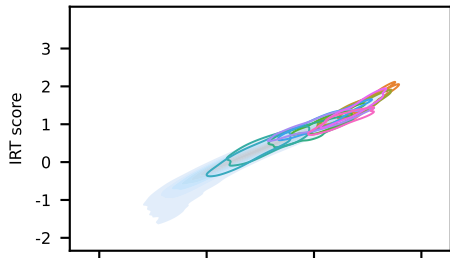

2023 Humanities

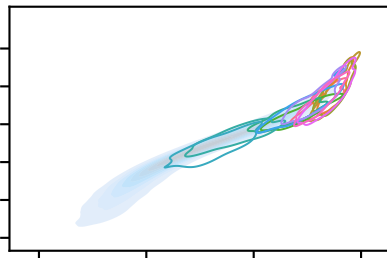

2023 Natural Sciences

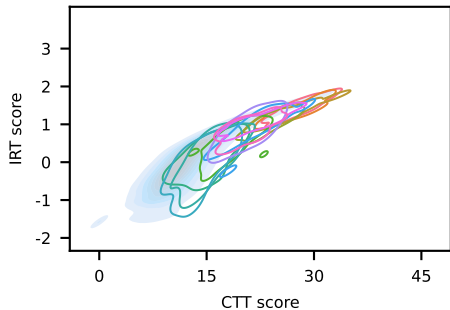

2023 Mathematics

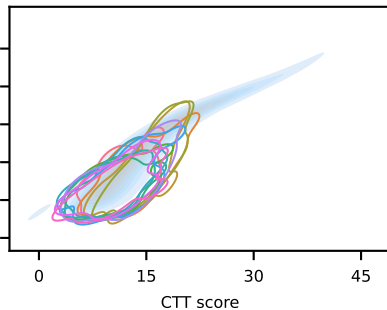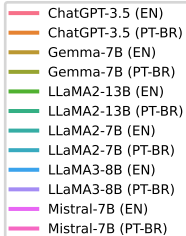

Supplement: supplementary_material [file attachment]

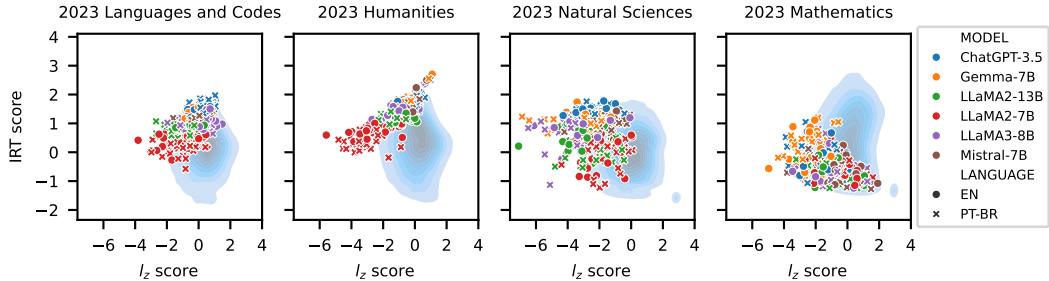

Supplement: supplementary_material [file attachment]

2023 Languages and Codes

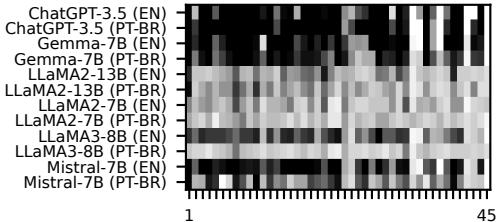

2023 Natural Sciences

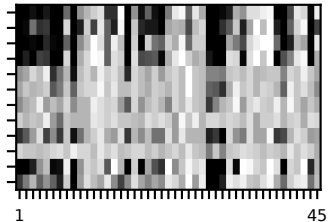

2023 Humanities

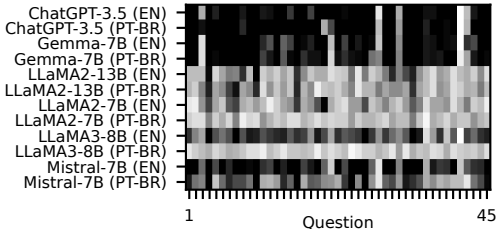

2023 Mathematics

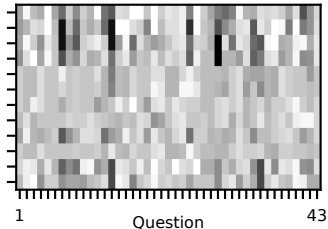

Supplement: supplementary_material [file attachment]
